# Supplementary material for: Probing the structure and dynamics of the heterocyclic PAH xanthene and its water complexes with infrared and microwave spectroscopy
Source: Royal Society of Chemistry journal article supplement (doi:10.1039/d4cp03030c), 2024-01-01
Supplement: d4cp03030c1.pdf [file d4cp03030c1.pdf]

**Supplementary information:**

**Probing the structure and dynamics of the  
heterocyclic PAH xanthene and its water  
complexes with infrared and microwave  
spectroscopy**

Donatella Loru,<sup>\*,†</sup> Wenhao Sun,<sup>†</sup> Hugo Nootebos,<sup>‡</sup> Amanda Steber,<sup>¶</sup> Piero  
Ferrari,<sup>‡</sup> and Melanie Schnell<sup>\*,†,§</sup>

<sup>†</sup>*Deutsches Elektronen-Synchrotron DESY, Notkestr. 85, 22607 Hamburg, Germany*

<sup>‡</sup>*Radboud University, Institute of Molecules and Materials, FELIX Laboratory,  
Toernooiveld 7, 6525 ED Nijmegen, The Netherlands*

<sup>¶</sup>*Department of Physical and Inorganic Chemistry, Faculty of Science, University of  
Valladolid, 47011 Valladolid, Spain*

<sup>§</sup>*Institute of Physical Chemistry, Christian-Albrechts-Universität zu Kiel, Max-Eyth-Str. 1,  
24118 Kiel, Germany*

E-mail: donatella.loru@desy.de; melanie.schnell@desy.de

# Contents

|          |                                                                                           |           |
|----------|-------------------------------------------------------------------------------------------|-----------|
| <b>1</b> | <b>Supplementary theoretical and experimental results</b>                                 | <b>3</b>  |
| 1.1      | Monomer . . . . .                                                                         | 3         |
| 1.2      | Xanthene-H <sub>2</sub> O . . . . .                                                       | 7         |
| 1.3      | Xanthene-(H <sub>2</sub> O) <sub>2</sub> . . . . .                                        | 12        |
| 1.4      | Xanthene-(H <sub>2</sub> O) <sub>3</sub> . . . . .                                        | 14        |
| 1.5      | Xanthene-(H <sub>2</sub> O) <sub>4</sub> . . . . .                                        | 17        |
| 1.6      | Non-Covalent interactions analysis . . . . .                                              | 19        |
| <b>2</b> | <b>Cartesian coordinates of molecular geometries</b>                                      | <b>20</b> |
| 2.1      | Cartesian coordinates of the xanthene monomer . . . . .                                   | 20        |
| 2.2      | Cartesian coordinates of the xanthene-H <sub>2</sub> O complexes . . . . .                | 21        |
| 2.3      | Cartesian coordinates of the xanthene-(H <sub>2</sub> O) <sub>2</sub> complexes . . . . . | 26        |
| 2.4      | Cartesian coordinates of the xanthene-(H <sub>2</sub> O) <sub>3</sub> complexes . . . . . | 31        |
| 2.5      | Cartesian coordinates of the xanthene-(H <sub>2</sub> O) <sub>4</sub> complexes . . . . . | 37        |
| <b>3</b> | <b>Measured rotational transitions</b>                                                    | <b>43</b> |
| 3.1      | Frequency lists of the xanthene monomer . . . . .                                         | 43        |
| 3.2      | Frequency lists of the xanthene-H <sub>2</sub> O complexes . . . . .                      | 56        |
| 3.3      | Frequency list of the xanthene-(H <sub>2</sub> O) <sub>2</sub> complex . . . . .          | 84        |
| 3.4      | Frequency list of the xanthene-(H <sub>2</sub> O) <sub>3</sub> complex . . . . .          | 89        |
| 3.5      | Frequency list of the xanthene-(H <sub>2</sub> O) <sub>4</sub> complex . . . . .          | 91        |

# 1 Supplementary theoretical and experimental results

## 1.1 Monomer

Table S1: Experimental spectroscopic parameters for the parent species and seven  $^{13}\text{C}$  singly-substituted isotopologues of xanthene, including rotational constants ( $A$ ,  $B$ , and  $C$ ), centrifugal distortion constants ( $D_J$ ,  $D_{JK}$ , and  $D_K$ ), number of lines in total (N), and root-mean-square (RMS) deviation.  $0^+$  and  $0^-$  denote the two tunneling states. The fittings were performed with Watson's  $S$ -reduced Hamiltonian in its  $I'$  representation using Pickett's SP-FIT program. Note that limited by number of observed transitions, the  $0^+$  state of  $^{13}\text{C}_1$  and  $^{13}\text{C}_7$  were excluded from the fit.

| Parameters | Units | parent        |               | $^{13}\text{C}_1$ |               |
|------------|-------|---------------|---------------|-------------------|---------------|
|            |       | $0^+$         | $0^-$         | $0^+$             | $0^-$         |
| $A$        | MHz   | 2031.0404(12) | 2032.1108(11) |                   | 2017.0066(10) |
| $B$        | MHz   | 466.05932(60) | 465.95043(44) |                   | 463.30596(36) |
| $C$        | MHz   | 385.25282(60) | 385.12537(40) |                   | 382.78050(24) |
| $D_J$      | kHz   | 0.1180(49)    | 0.0192(29)    |                   | [0.0192]      |
| $D_{JK}$   | kHz   | -0.258(23)    | -0.298(18)    |                   | [-0.298]      |
| $D_K$      | kHz   | 1.17(15)      | 1.38(14)      |                   | [1.38]        |
| N          |       |               | 68            |                   | 18            |
| RMS        | kHz   |               | 7.3           |                   | 9.4           |

  

| Parameters | Units | $^{13}\text{C}_2$ |                | $^{13}\text{C}_3$ |               |
|------------|-------|-------------------|----------------|-------------------|---------------|
|            |       | $0^+$             | $0^-$          | $0^+$             | $0^-$         |
| $A$        | MHz   | 2026.0773(10)     | 2027.13468(83) | 2027.7780(17)     | 2028.8402(11) |
| $B$        | MHz   | 465.40538(60)     | 465.29873(36)  | 465.46580(90)     | 465.35884(45) |
| $C$        | MHz   | 384.64404(62)     | 384.51648(24)  | 384.74787(70)     | 384.61783(29) |
| $D_J$      | kHz   | [0.1180]          | [0.0192]       | [0.1180]          | [0.0192]      |
| $D_{JK}$   | kHz   | [-0.258]          | [-0.298]       | [-0.258]          | [-0.298]      |
| $D_K$      | kHz   | [1.17]            | [1.38]         | [1.17]            | [1.38]        |

|                       |       |                   |                |                   |                |
|-----------------------|-------|-------------------|----------------|-------------------|----------------|
| N                     |       | 36                |                | 31                |                |
| RMS                   | kHz   | 8.5               |                | 9.6               |                |
|                       |       | $^{13}\text{C}_4$ |                | $^{13}\text{C}_5$ |                |
| Parameters            | Units | 0 <sup>+</sup>    | 0 <sup>-</sup> | 0 <sup>+</sup>    | 0 <sup>-</sup> |
| <i>A</i>              | MHz   | 2015.2048(36)     | 2016.2135(11)  | 2025.6235(11)     | 2026.68632(88) |
| <i>B</i>              | MHz   | 463.7431(11)      | 463.65542(58)  | 460.69034(39)     | 460.58401(38)  |
| <i>C</i>              | MHz   | 383.06776(92)     | 382.98255(42)  | 381.41548(44)     | 381.28854(25)  |
| <i>D<sub>J</sub></i>  | kHz   | [0.1180]          | [0.0192]       | [0.1180]          | [0.0192]       |
| <i>D<sub>JK</sub></i> | kHz   | [-0.258]          | [-0.298]       | [-0.258]          | [-0.298]       |
| <i>D<sub>K</sub></i>  | kHz   | [1.17]            | [1.38]         | [1.17]            | [1.38]         |
| N                     |       | 23                |                | 42                |                |
| RMS                   | kHz   | 9.1               |                | 8.3               |                |
|                       |       | $^{13}\text{C}_6$ |                | $^{13}\text{C}_7$ |                |
| Parameters            | Units | 0 <sup>+</sup>    | 0 <sup>-</sup> | 0 <sup>+</sup>    | 0 <sup>-</sup> |
| <i>A</i>              | MHz   | 2027.5799(13)     | 2028.6343(10)  |                   | 2010.5640(15)  |
| <i>B</i>              | MHz   | 460.41980(49)     | 460.31357(33)  |                   | 465.92388(45)  |
| <i>C</i>              | MHz   | 381.31012(55)     | 381.18595(22)  |                   | 384.42183(29)  |
| <i>D<sub>J</sub></i>  | kHz   | [0.1180]          | [0.0192]       |                   | [0.0192(34)]   |
| <i>D<sub>JK</sub></i> | kHz   | [-0.258]          | [-0.298]       |                   | [-0.298(21)]   |
| <i>D<sub>K</sub></i>  | kHz   | [1.17]            | [1.38]         |                   | [1.38(16)]     |
| N                     |       | 31                |                |                   | 19             |
| RMS                   | kHz   | 7.6               |                |                   | 9.8            |

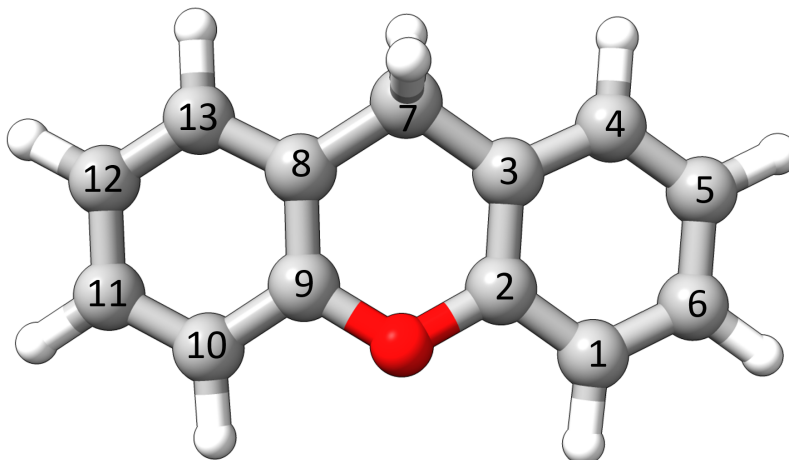

Figure S1: Theoretical structure of the xanthenone monomer calculated at the B3LYP-D3BJ/def2-TZVP level of theory. The numbering of the carbon atoms, which was used for the identification of the  $^{13}\text{C}$  isotopologues, is provided.

Table S2: Kraitchman coordinates (in  $\text{\AA}$ ) and the estimated uncertainties for the substituted structure ( $r_s$ ) of the xanthenone monomer, obtained with rotational constants of the parent species and seven  $^{13}\text{C}$  isotopologues in the  $0^-$  state.

| Atoms                           | a( $\Delta a$ ) | b( $\Delta b$ ) | c( $\Delta c$ ) |
|---------------------------------|-----------------|-----------------|-----------------|
| C <sub>1</sub> /C <sub>10</sub> | 2.48657(65)     | 1.3685(12)      | 0.086(19)       |
| C <sub>2</sub> /C <sub>9</sub>  | 1.2231(13)      | 0.7657(21)      | 0.1638(99)      |
| C <sub>3</sub> /C <sub>8</sub>  | 1.1640(14)      | 0.6158(26)      | 0.150(10)       |
| C <sub>4</sub> /C <sub>13</sub> | 2.31810(69)     | 1.4082(11)      | 0.0             |
| C <sub>5</sub> /C <sub>12</sub> | 3.55040(45)     | 0.7916(20)      | 0.2248(72)      |
| C <sub>6</sub> /C <sub>11</sub> | 3.63745(44)     | 0.5982(27)      | 0.2756(59)      |
| C <sub>7</sub>                  | 0.0             | 1.5830(10)      | 0.4060(40)      |

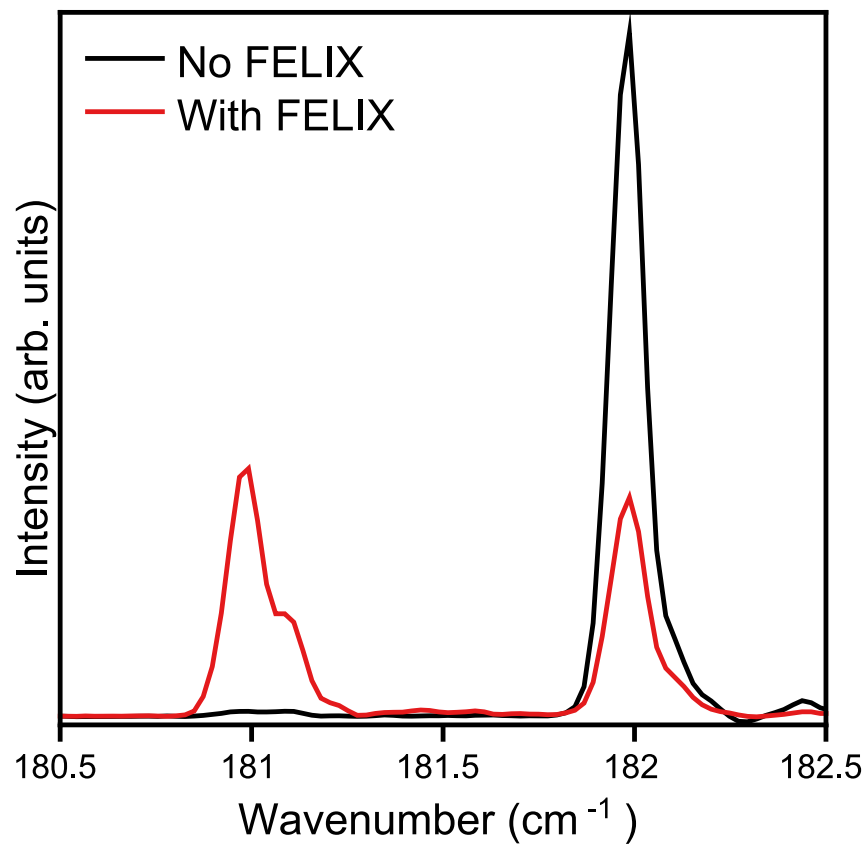

Figure S2: Mass spectra of xanthene ( $m/z = 182$ ) recorded with (red trace) and without (black trace) FELIX. The comparison between the two mass spectra shows the depletion in the signal of xanthene and signal in-growth in its dissociation channel induced by FELIX.

## 1.2 Xanthene-H<sub>2</sub>O

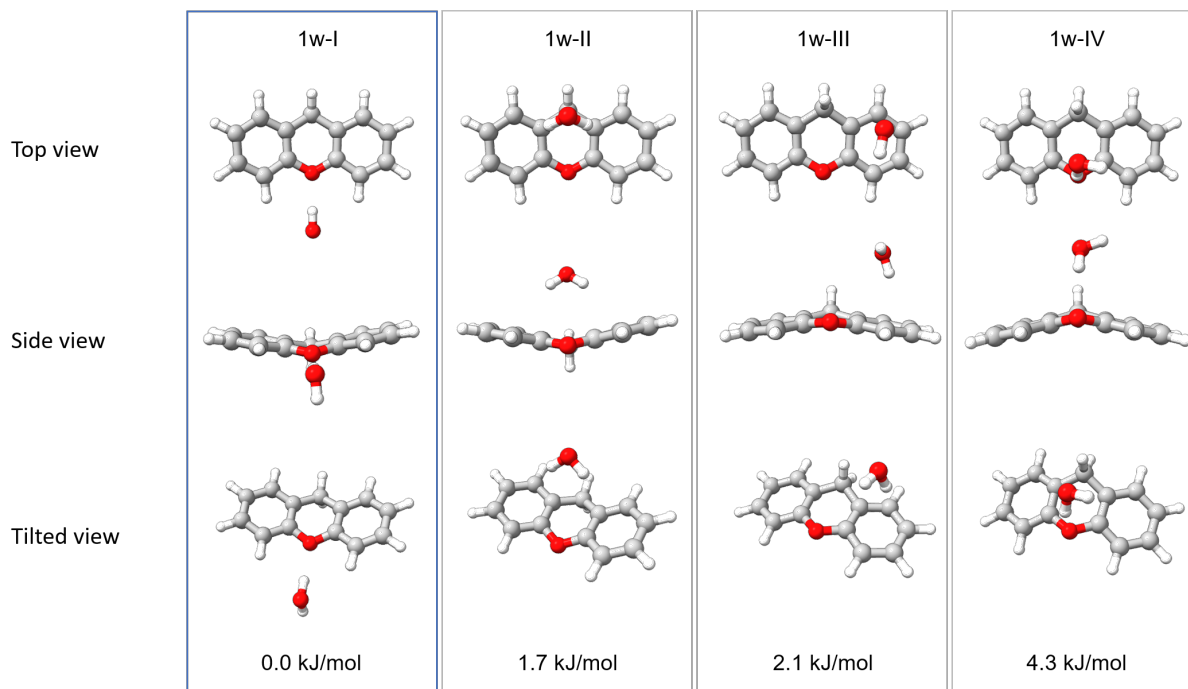

Figure S3: Molecular geometries of the energetically low-lying isomers of the xanthene-H<sub>2</sub>O complexes within an energy window of 5.0 kJ/mol, calculated at the B3LYP-D4/def2-QZVP level of theory. Each isomer is shown from three different perspectives: top view, side view, and tilted view. The relative energies (in kJ/mol), corrected with zero-point energies (ZPE), are provided, with the energy of 1w-I set to 0 kJ/mol. The molecular geometry of the experimentally observed isomer is highlighted by a blue box. The corresponding Cartesian coordinates are available in Tables S14–S17 in Section 2.2. Rendered using UCSF ChimeraX software.<sup>1</sup>

Table S3: Theoretical spectroscopic constants for the xanthene-H<sub>2</sub>O complexes, calculated at the B3LYP-D4/def2-QZVP level of theory. The relative energies ( $\Delta E_0$  in kJ mol<sup>-1</sup>) with vibrational zero-point energy corrections.

| Isomers | $\Delta E_0$ | A/MHz  | B/MHz | C/MHz | $\mu_a/D$ | $\mu_b/D$ | $\mu_c/D$ |
|---------|--------------|--------|-------|-------|-----------|-----------|-----------|
| 1w-I    | 0.0          | 934.3  | 465.8 | 318.4 | 0.0       | 2.6       | -1.3      |
| 1w-II   | 1.7          | 1227.8 | 425.3 | 377.2 | 0.0       | -0.8      | 1.7       |
| 1w-III  | 2.1          | 1239.7 | 379.7 | 351.4 | 0.3       | 0.9       | 1.2       |
| 1w-IV   | 2.3          | 1148.6 | 408.0 | 386.2 | -1.1      | 0.9       | 0.9       |

Table S4: Experimental spectroscopic constants for the xanthene-H<sub>2</sub>O, 1w-I, fitted with Watson's *A*-reduced Hamiltonian in its *I'* representation using Pickett's SPFIT program.

| Parameters    | Units | Calc. | Expt. (average) |
|---------------|-------|-------|-----------------|
| $A$           | MHz   | 934.3 | 913.47858(16)   |
| $B$           | MHz   | 465.8 | 464.72514(10)   |
| $C$           | MHz   | 318.4 | 317.02967(11)   |
| $\Delta_J$    | kHz   |       | 0.01419(62)     |
| $\Delta_{JK}$ | kHz   |       | 0.5924(12)      |
| $\Delta_K$    | kHz   |       | -0.3894(23)     |
| $\delta_K$    | kHz   |       | 0.3378(15)      |
| N (a b c)     |       |       | 226 (0 193 33)  |
| RMS           | kHz   |       | 7.0             |

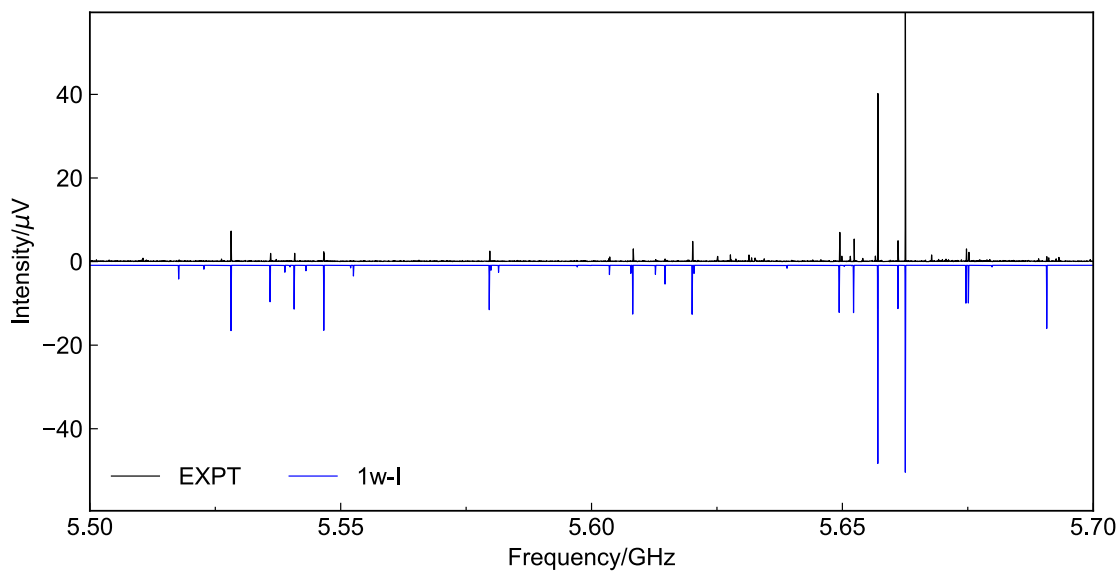

Figure S4: Portion of the microwave spectrum highlighting the transitions arising from the 1w-I complex.



Table S5: Experimental spectroscopic constants for  $^{13}\text{C}$  singly substituted isotopologues of 1w-I, including rotational constants ( $A$ ,  $B$ , and  $C$ ), number of lines in total ( $N$ ), and root-mean-square (RMS) deviation. The centrifugal distortion constants were fixed to those for the parent species (see Table S4). The fittings were performed with Watson’s  $A$ -reduction Hamiltonian in its  $I'$  representation using Pickett’s SPFIT program.

| Parameters | Units | $^{13}\text{C}_1/^{13}\text{C}_{13}$ | $^{13}\text{C}_2/^{13}\text{C}_{12}$ | $^{13}\text{C}_3/^{13}\text{C}_{11}$ | $^{13}\text{C}_4/^{13}\text{C}_{10}$ |
|------------|-------|--------------------------------------|--------------------------------------|--------------------------------------|--------------------------------------|
| $A$        | MHz   | 913.37507(26)                        | 911.69772(38)                        | 912.96821(39)                        | 911.66649(48)                        |
| $B$        | MHz   | 464.13978(15)                        | 462.42283(41)                        | 459.38403(30)                        | 459.16642(36)                        |
| $C$        | MHz   | 316.748151(89)                       | 315.77515(11)                        | 314.54398(12)                        | 314.24891(17)                        |
| $N$        |       | 47                                   | 43                                   | 36                                   | 36                                   |
| RMS        | kHz   | 6.1                                  | 8.1                                  | 7.8                                  | 9.5                                  |
| Parameters | Unit  | $^{13}\text{C}_5/^{13}\text{C}_9$    | $^{13}\text{C}_6/^{13}\text{C}_8$    | $^{13}\text{C}_7$                    |                                      |
| $A$        | MHz   | 908.48592(39)                        | 911.32408(29)                        | 907.04529(45)                        |                                      |
| $B$        | MHz   | 462.11299(45)                        | 464.06271(22)                        | 464.58472(71)                        |                                      |
| $C$        | MHz   | 315.21282(13)                        | 316.48392(10)                        | 316.34505(16)                        |                                      |
| $N$        |       | 32                                   | 42                                   | 19                                   |                                      |
| RMS        | kHz   | 6.7                                  | 5.9                                  | 6.2                                  |                                      |

Since no  $c$ -type transitions were observed for any of the singly-substituted  $^{13}\text{C}$  isotopologues, to determine the substitution structure of xanthene in the 1w-I complex, we considered the rotational constants of the monomer obtained from an average fit that did not account for the tunneling splitting of the  $c$ -type transitions; instead, only the center frequencies were considered.

Table S6: Kraitchman coordinates (in Å) and the estimated uncertainties for the substituted structure ( $r_s$ ) of xanthene in the 1w-I complex, obtained with rotational constants of the parent species and seven  $^{13}\text{C}$  isotopologues.

| Atoms                           | a( $\Delta a$ ) | b( $\Delta b$ ) | c( $\Delta c$ ) |
|---------------------------------|-----------------|-----------------|-----------------|
| C <sub>1</sub> /C <sub>13</sub> | -3.61682(43)    | -1.0232(15)     | -0.2840(54)     |
| C <sub>2</sub> /C <sub>12</sub> | -2.47438(62)    | -1.75523(88)    | 0.0             |
| C <sub>3</sub> /C <sub>11</sub> | -1.2229(12)     | -1.1215(14)     | 0.2367(64)      |
| C <sub>4</sub> /C <sub>10</sub> | -1.1704(13)     | 0.2432(63)      | 0.062(25)       |
| C <sub>5</sub> /C <sub>9</sub>  | -2.30906(66)    | 1.0056(15)      | -0.2858(54)     |
| C <sub>6</sub> /C <sub>8</sub>  | -3.53289(43)    | 0.3671(42)      | -0.4246(36)     |
| C <sub>7</sub>                  | 0.0             | -1.87753(84)    | -0.6362(25)     |

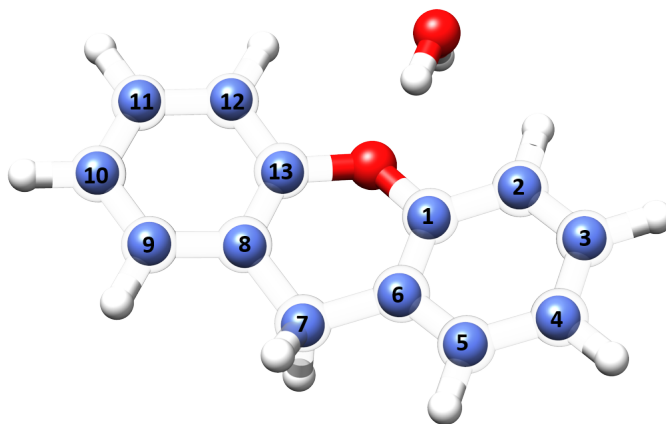

Figure S5: Comparison of the Kraitchman substitution coordinates ( $r_s$ , orange solid spheres) of 1w-I with the equilibrium structure ( $r_e$ , ball and stick model) calculated at the B3LYP-D4/def2-QZVP level of theory. Rendered using UCSF ChimeraX software.<sup>1</sup>

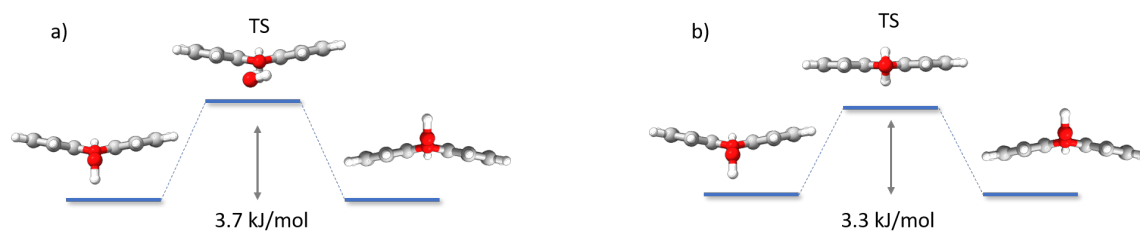

Figure S6: Tunneling pathways for the 1w-I complex. (a) The pathway involves a swinging motion of the water molecule, causing a switch of the water's hydrogen atom involved in the O-H $\cdots$ O interaction, while xantheno undergoes a butterfly-like motion to tunnel between its two equivalent geometries. (b) The pathway involves a simple flip of the water's dangling hydrogen atom above and below xantheno's plane, alongside the butterfly-like motion of xantheno. The reported energy barriers are single-point energies calculated at the DLPNO-CCSD(T)/cc-pVTZ//B3LYP-D3(BJ)/def2-TZVP level of theory.

### 1.3 Xanthene-(H<sub>2</sub>O)<sub>2</sub>

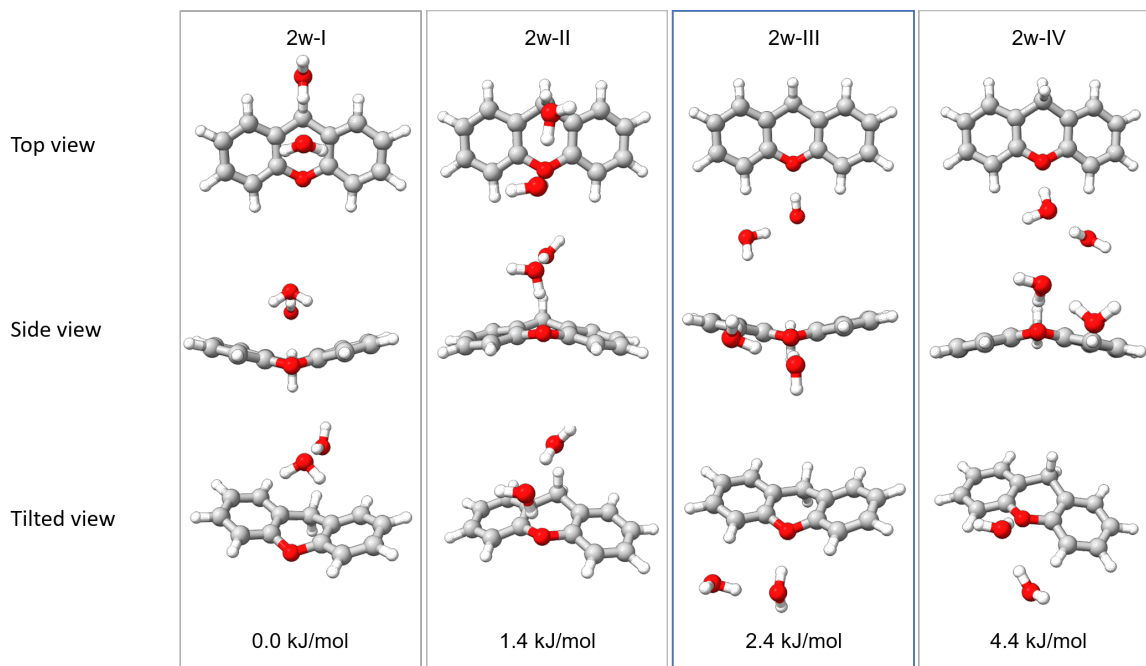

Figure S7: Molecular geometries of the energetically low-lying isomers of the xanthene-(H<sub>2</sub>O)<sub>2</sub> complexes within an energy window of 5.0 kJ/mol, calculated at the B3LYP-D4/def2-QZVP level of theory. Each isomer is shown from three different perspectives: top view, side view, and tilted view. The relative energies (in kJ/mol), corrected with zero-point energies (ZPE), are provided, with the energy of 2w-I set to 0 kJ/mol. The molecular geometry of the experimentally observed isomer is highlighted by a blue box. The corresponding Cartesian coordinates are available in Tables S18–S21 in Section 2.3. Rendered using UCSF ChimeraX software.<sup>1</sup>

Table S7: Theoretical spectroscopic constants for the xanthene-(H<sub>2</sub>O)<sub>2</sub> complexes, calculated at the B3LYP-D4/def2-QZVP level of theory. The relative energies ( $\Delta E_0$  in kJ mol<sup>-1</sup>) with vibrational zero-point energy corrections.

| Isomers | $\Delta E_0$ | A/MHz | B/MHz | C/MHz | $\mu_a/D$ | $\mu_b/D$ | $\mu_c/D$ |
|---------|--------------|-------|-------|-------|-----------|-----------|-----------|
| 2w-I    | 0.0          | 770.6 | 425.9 | 325.6 | 0.0       | 0.3       | 0.3       |
| 2w-II   | 1.4          | 738.0 | 371.2 | 346.9 | -0.4      | 0.7       | -0.5      |
| 2w-III  | 2.4          | 625.7 | 406.1 | 255.6 | -2.3      | 1.2       | 0.7       |
| 2w-IV   | 4.4          | 632.3 | 400.5 | 260.9 | -2.4      | 1.3       | 1.4       |

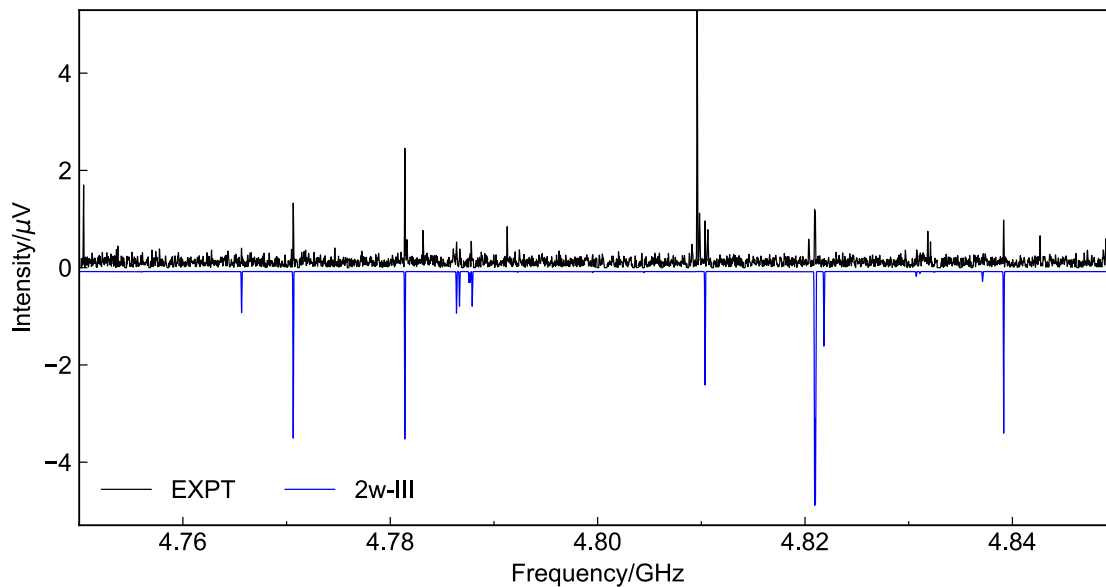

Figure S8: Portion of the microwave spectrum highlighting the transitions arising from the 2w-III complex.

Table S8: Experimental spectroscopic constants for the xanthene-(H<sub>2</sub>O)<sub>2</sub> complex, 2w-III, fitted with Watson's *A*-reduced Hamiltonian in its *I'* representation using Pickett's SPFIT program. The spectrum is assigned to 2w-III due to its lower energy compared to 2w-IV, and its smaller dipole-moment component along the principal *c*-axis, which is in consistency with the observed line intensities.

| Parameters    | Units | Calc.  |       | Expt.          |
|---------------|-------|--------|-------|----------------|
|               |       | 2w-III | 2w-IV |                |
| <i>A</i>      | MHz   | 625.7  | 632.3 | 610.66041(75)  |
| <i>B</i>      | MHz   | 406.1  | 400.5 | 404.52319(18)  |
| <i>C</i>      | MHz   | 255.6  | 260.9 | 255.01107(21)  |
| $\Delta_J$    | kHz   |        |       | 0.0150(10)     |
| $\Delta_{JK}$ | kHz   |        |       | 0.0832(76)     |
| $\Delta_K$    | kHz   |        |       | 0.126(27)      |
| N (a b c)     |       |        |       | 107 (72 23 12) |

|     |     |     |
|-----|-----|-----|
| RMS | kHz | 9.0 |
|-----|-----|-----|

## 1.4 Xanthene-(H<sub>2</sub>O)<sub>3</sub>

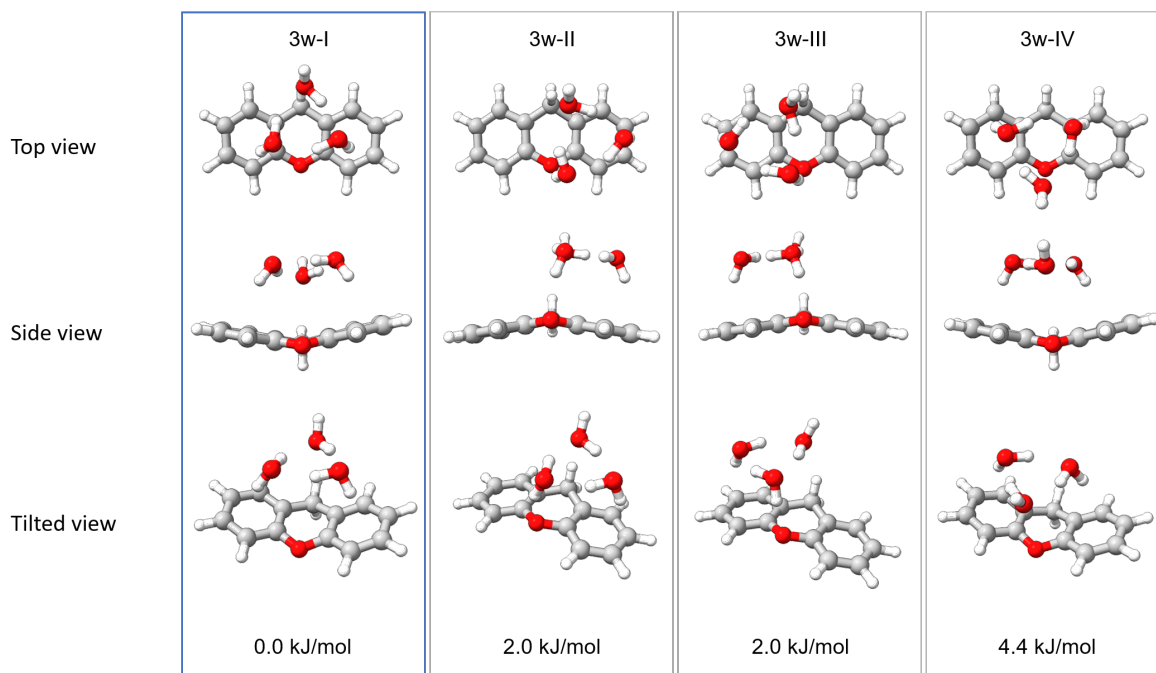

Figure S9: Molecular geometries of the energetically low-lying isomers of the xanthene-(H<sub>2</sub>O)<sub>3</sub> complexes within an energy window of 5.0 kJ/mol, calculated at the B3LYP-D4/def2-QZVP level of theory. Each isomer is shown from three different perspectives: top view, side view, and tilted view. The relative energies (in kJ/mol), corrected with zero-point energies (ZPE), are provided, with the energy of 3w-I set to 0 kJ/mol. The molecular geometry of the experimentally observed isomer is highlighted by a blue box. The corresponding Cartesian coordinates are available in Tables S22–S25 in Section 2.4. Rendered using UCSF ChimeraX software.<sup>1</sup>

Table S9: Theoretical spectroscopic constants for the xanthene-(H<sub>2</sub>O)<sub>3</sub> complexes, calculated at the B3LYP-D4/def2-QZVP level of theory. The relative energies ( $\Delta E_0$  in kJ mol<sup>-1</sup>) with vibrational zero-point energy corrections.

| Isomers | $\Delta E_0$ | A/MHz | B/MHz | C/MHz | $\mu_a/D$ | $\mu_b/D$ | $\mu_c/D$ |
|---------|--------------|-------|-------|-------|-----------|-----------|-----------|
| 3w-I    | 0.0          | 690.8 | 356.4 | 319.4 | 0.3       | -0.8      | -1.7      |
| 3w-II   | 2.0          | 674.9 | 320.0 | 295.6 | 0.9       | 1.9       | 1.7       |
| 3w-III  | 2.0          | 674.3 | 322.8 | 295.8 | 1.0       | -1.7      | -1.7      |
| 3w-IV   | 4.5          | 685.4 | 357.1 | 319.5 | 0.2       | -1.9      | 0.4       |

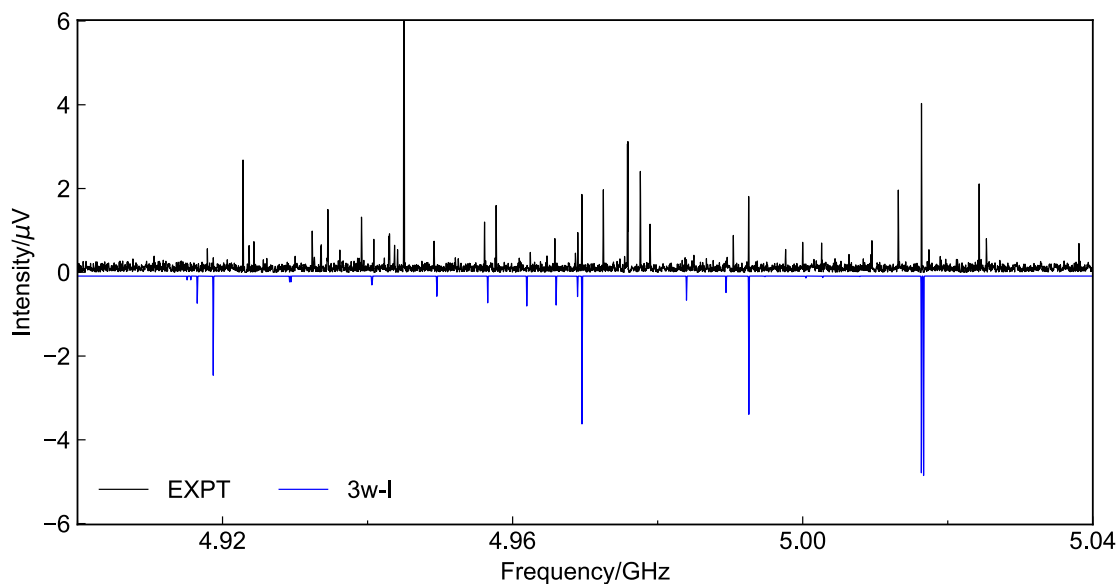

Figure S10: Portion of the microwave spectrum highlighting the transitions arising from the 3w-I complex.

Table S10: Experimental spectroscopic constants for the xanthene-(H<sub>2</sub>O)<sub>3</sub> complex, 3w-I, fitted with Watson's *A*-reduced Hamiltonian in its *I'* representation using Pickett's SPFIT program.

| Parameters | Units | Calc. | Expt.         |
|------------|-------|-------|---------------|
| <i>A</i>   | MHz   | 690.8 | 668.50669(85) |

---

|               |     |       |               |
|---------------|-----|-------|---------------|
| $B$           | MHz | 356.4 | 359.35148(40) |
| $C$           | MHz | 319.4 | 313.21931(45) |
| $\Delta_J$    | kHz |       | 0.0530(25)    |
| $\Delta_{JK}$ | kHz |       | 0.176(13)     |
| N (a b c)     |     |       | 52 (0 0 49)   |
| RMS           | kHz |       | 10.6          |

---



## 1.5 Xanthene-(H<sub>2</sub>O)<sub>4</sub>

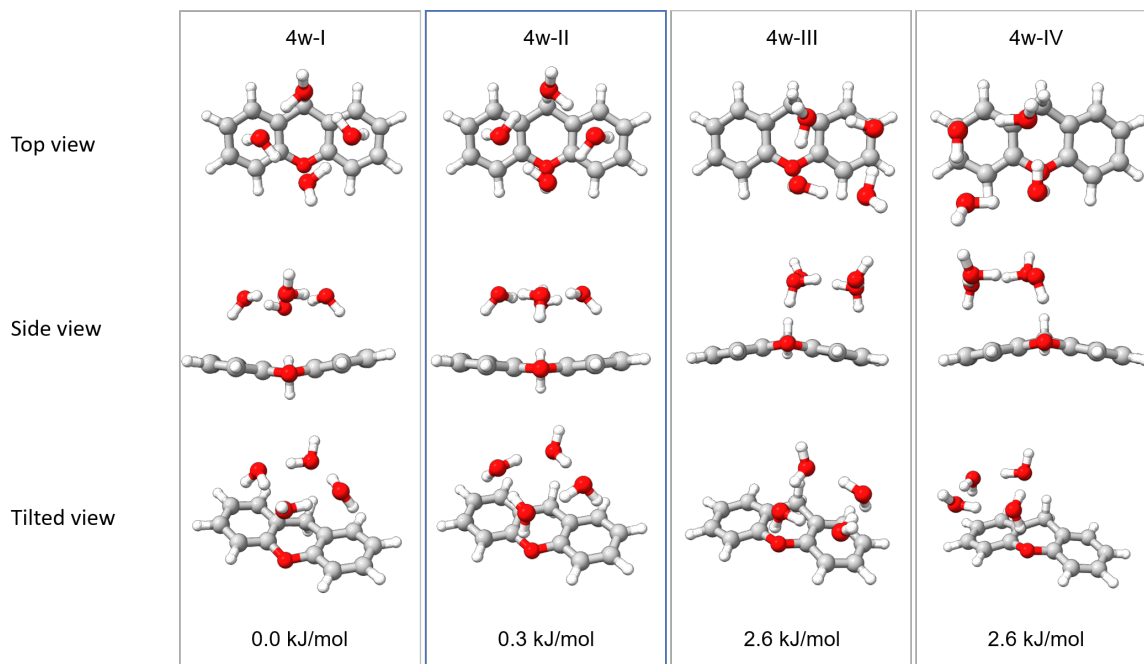

Figure S11: Molecular geometries of the energetically low-lying isomers of the xanthene-(H<sub>2</sub>O)<sub>4</sub> complexes within an energy window of 5.0 kJ/mol, calculated at the B3LYP-D4/def2-QZVP level of theory. Each isomer is shown from three different perspectives: top view, side view, and tilted view. The relative energies (in kJ/mol), corrected with zero-point energies (ZPE), are provided, with the energy of 4w-I set to 0 kJ/mol. The molecular geometry of the experimentally observed isomer is highlighted by a blue box. The corresponding Cartesian coordinates are available in Tables S26–S29 in Section 2.5. Rendered using UCSF ChimeraX software.<sup>1</sup>

Table S11: Theoretical spectroscopic constants for the xanthene-(H<sub>2</sub>O)<sub>4</sub> complexes, calculated at the B3LYP-D4/def2-QZVP level of theory. The relative energies ( $\Delta E_0$  in kJ mol<sup>-1</sup>) with vibrational zero-point energy corrections.

| Isomers | $\Delta E_0$ | A/MHz | B/MHz | C/MHz | $\mu_a/D$ | $\mu_b/D$ | $\mu_c/D$ |
|---------|--------------|-------|-------|-------|-----------|-----------|-----------|
| 4w-I    | 0.0          | 559.8 | 320.4 | 290.7 | -0.1      | -0.4      | -0.9      |
| 4w-II   | 0.3          | 569.3 | 317.3 | 289.7 | -0.1      | -2.7      | -2.4      |
| 4w-III  | 2.6          | 582.7 | 279.5 | 247.7 | -0.6      | 1.2       | 0.7       |
| 4w-IV   | 2.6          | 582.0 | 277.0 | 246.0 | -0.6      | 1.2       | -0.6      |

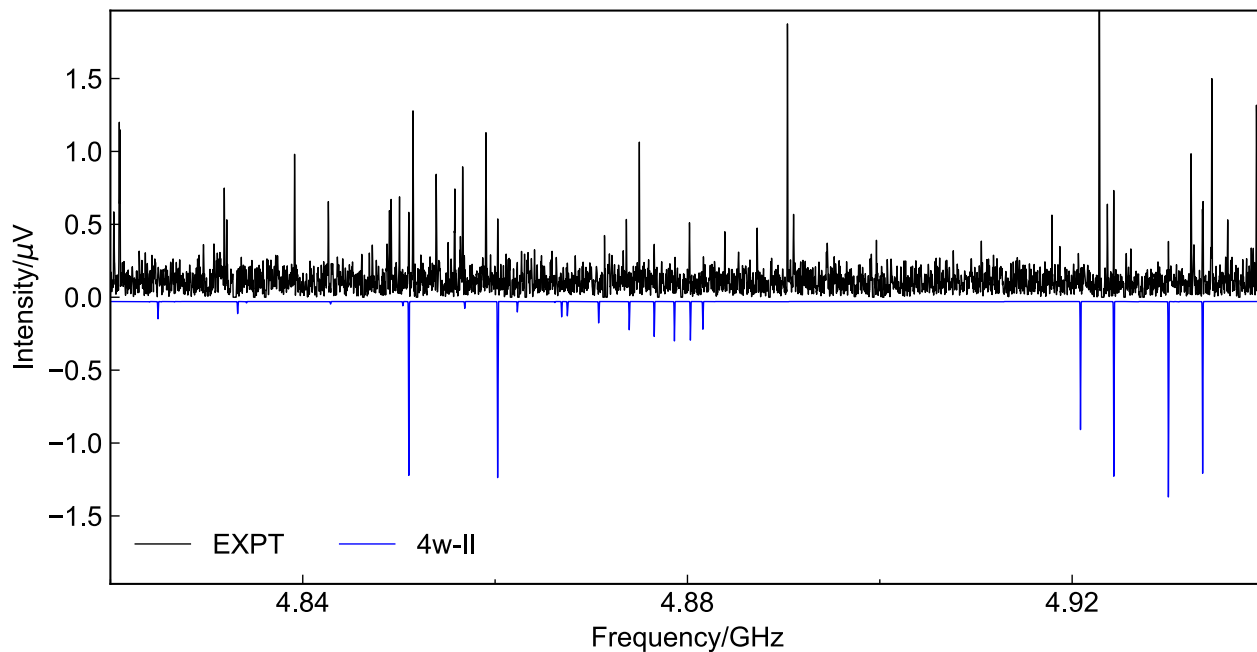

Figure S12: Portion of the microwave spectrum highlighting the transitions arising from the 4w-II complex.

Table S12: Experimental spectroscopic constants for the xanthene-(H<sub>2</sub>O)<sub>4</sub> complex, 4w-II, fitted with Watson's *A*-reduced Hamiltonian in its *I'* representation using Pickett's SPFIT program. The spectrum is assigned to 4w-II due to its larger dipole-moment components compared to 4w-I.

| Parameters | Units | Calc. |       | Expt.         |
|------------|-------|-------|-------|---------------|
|            |       | 4w-I  | 4w-II |               |
| $A$        | MHz   | 559.8 | 569.3 | 558.1509(10)  |
| $B$        | MHz   | 320.4 | 317.3 | 314.64302(37) |
| $C$        | MHz   | 290.7 | 289.7 | 286.93462(51) |
| $\Delta_K$ | kHz   |       |       | 0.136(24)     |
| $\delta_K$ | kHz   |       |       | 1.682(98)     |
| N (a b c)  |       |       |       | 44 (0 24 20)  |
| RMS        | kHz   |       |       | 10.6          |

## 1.6 Non-Covalent interactions analysis

To visualize the non-covalent interactions at play in the observed xanthene-(H<sub>2</sub>O)<sub>n=1-4</sub> complexes, we applied the non-covalent interaction method (NCI) using the Multiwfn program.<sup>2,3</sup> This method is based on the analysis of the electron density and its derivatives to reveal the non-covalent interactions within a molecular system.

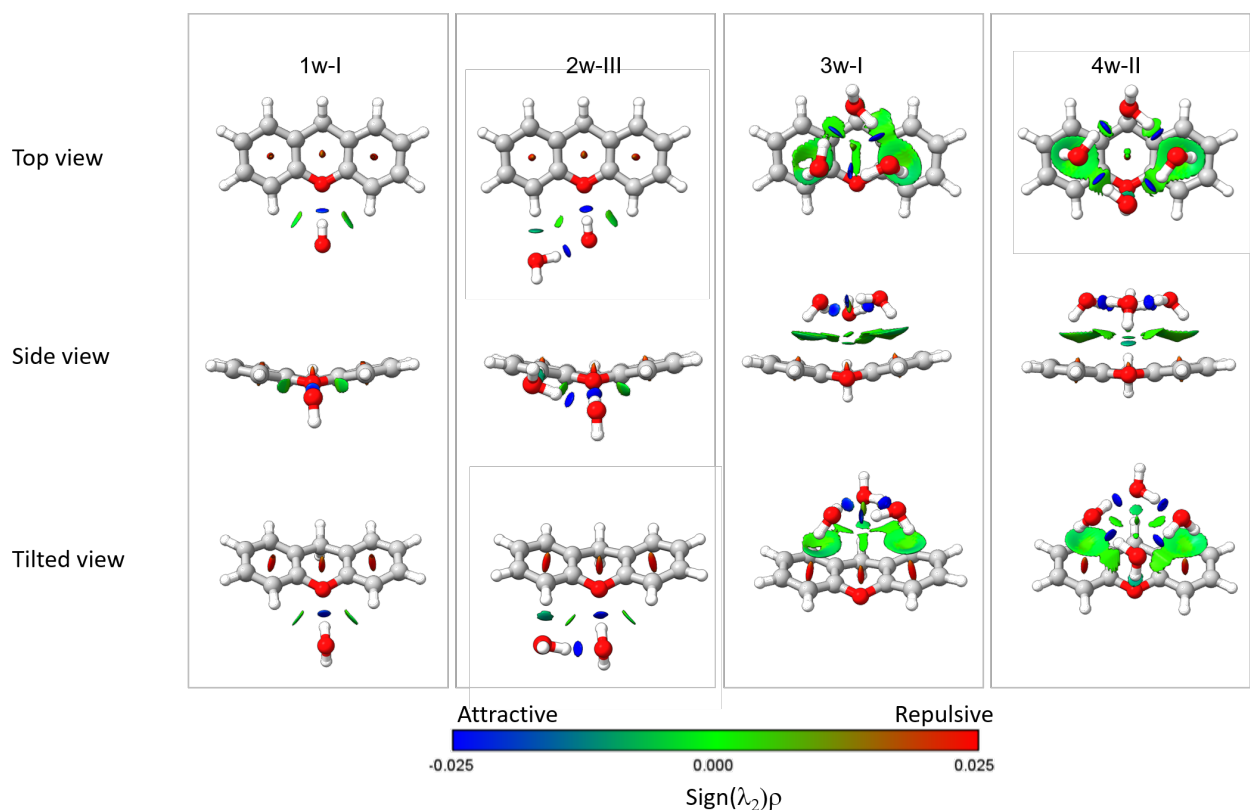

Figure S13: NCI plots of the observed xanthene-(H<sub>2</sub>O)<sub>n=1-4</sub> complexes. The presented structures were optimized at the B3LYP-D4/def2-QZVP level of theory. The isosurfaces are displayed with a cut-off of 0.5. Attractive and repulsive interactions are defined by the sign of  $\text{sign}(\lambda_2)\rho$ , where  $\lambda_2$  is the second eigenvalue of the electron density Hessian and  $\rho$  is the electron density.

## 2 Cartesian coordinates of molecular geometries

### 2.1 Cartesian coordinates of the xanthene monomer

Table S13: Cartesian coordinates for the equilibrium structure of the xanthene monomer.

| Atoms | X         | Y         | Z         |
|-------|-----------|-----------|-----------|
| C     | -3.638007 | -0.599538 | 0.245328  |
| C     | -2.489632 | -1.361750 | 0.091187  |
| C     | -1.245418 | -0.768434 | -0.106602 |
| C     | -1.181905 | 0.621213  | -0.125197 |
| C     | -2.321923 | 1.401731  | 0.026865  |
| C     | -3.550899 | 0.788714  | 0.206818  |
| C     | 1.181900  | 0.621222  | -0.125175 |
| C     | 1.245422  | -0.768429 | -0.106600 |
| C     | 2.489636  | -1.361749 | 0.091166  |
| H     | 2.552983  | -2.442310 | 0.116487  |
| C     | 3.638011  | -0.599539 | 0.245312  |
| C     | 3.550895  | 0.788713  | 0.206825  |
| C     | 2.321919  | 1.401735  | 0.026892  |
| H     | -4.593187 | -1.082509 | 0.393899  |
| H     | -2.552973 | -2.442313 | 0.116528  |
| H     | -2.223805 | 2.477481  | 0.005670  |
| H     | -4.438573 | 1.394091  | 0.325077  |
| H     | 4.593196  | -1.082505 | 0.393872  |
| H     | 4.438567  | 1.394095  | 0.325088  |
| H     | 2.223810  | 2.477486  | 0.005706  |

| Atoms | X         | Y         | Z         |
|-------|-----------|-----------|-----------|
| O     | -0.000001 | 1.299124  | -0.297253 |
| C     | 0.000002  | -1.581950 | -0.334063 |
| H     | -0.000011 | -1.967113 | -1.360474 |
| H     | -0.000005 | -2.459814 | 0.314618  |

## 2.2 Cartesian coordinates of the xanthene-H<sub>2</sub>O complexes

Table S14: Cartesian coordinates for the equilibrium structure of the xanthene-H<sub>2</sub>O complex, 1w-I.

| Atoms | X         | Y         | Z         |
|-------|-----------|-----------|-----------|
| C     | -3.618844 | 1.010983  | -0.266521 |
| C     | -2.477462 | 1.744610  | 0.022110  |
| C     | -1.243612 | 1.123096  | 0.194594  |
| C     | -1.186722 | -0.257593 | 0.046148  |
| C     | -2.315356 | -1.012091 | -0.244926 |
| C     | -3.535451 | -0.371830 | -0.394231 |
| C     | 1.186722  | -0.257594 | 0.046148  |
| C     | 1.243613  | 1.123096  | 0.194594  |
| C     | 2.477462  | 1.744610  | 0.022110  |
| H     | 2.538816  | 2.820509  | 0.124186  |
| C     | 3.618844  | 1.010983  | -0.266521 |
| C     | 3.535451  | -0.371830 | -0.394231 |
| C     | 2.315356  | -1.012091 | -0.244926 |
| H     | -4.567330 | 1.513010  | -0.392468 |

| Atoms | X         | Y         | Z         |
|-------|-----------|-----------|-----------|
| H     | -2.538816 | 2.820509  | 0.124186  |
| H     | -2.221737 | -2.082891 | -0.356775 |
| H     | -4.418376 | -0.952301 | -0.621008 |
| H     | 4.567330  | 1.513010  | -0.392468 |
| H     | 4.418376  | -0.952301 | -0.621008 |
| H     | 2.221737  | -2.082892 | -0.356774 |
| O     | 0.000000  | -0.948734 | 0.188481  |
| C     | 0.000000  | 1.885260  | 0.564999  |
| H     | 0.000000  | 2.865014  | 0.085497  |
| H     | 0.000000  | 2.077150  | 1.644497  |
| O     | 0.000000  | -3.853581 | 0.301716  |
| H     | 0.000000  | -4.156519 | 1.212207  |
| H     | 0.000000  | -2.888845 | 0.350855  |

Table S15: Cartesian coordinates for the equilibrium structure of the xanthene-H<sub>2</sub>O complex, 1w-II.

| Atoms | X         | Y         | Z         |
|-------|-----------|-----------|-----------|
| C     | -3.605560 | -0.487620 | 0.126265  |
| C     | -2.467512 | -1.101458 | 0.629701  |
| C     | -1.239515 | -0.444437 | 0.645008  |
| C     | -1.178575 | 0.840653  | 0.112547  |
| C     | -2.307887 | 1.471493  | -0.393668 |
| C     | -3.523561 | 0.806315  | -0.378782 |
| C     | 1.178575  | 0.840652  | 0.112547  |
| C     | 1.239515  | -0.444437 | 0.645008  |
| C     | 2.467512  | -1.101458 | 0.629701  |

| Atoms | X         | Y         | Z         |
|-------|-----------|-----------|-----------|
| H     | 2.526178  | -2.106775 | 1.026032  |
| C     | 3.605561  | -0.487620 | 0.126265  |
| C     | 3.523561  | 0.806315  | -0.378782 |
| C     | 2.307887  | 1.471493  | -0.393669 |
| H     | -4.549244 | -1.013642 | 0.126925  |
| H     | -2.526178 | -2.106775 | 1.026032  |
| H     | -2.213274 | 2.469038  | -0.797347 |
| H     | -4.404108 | 1.293433  | -0.772917 |
| H     | 4.549244  | -1.013641 | 0.126926  |
| H     | 4.404108  | 1.293433  | -0.772917 |
| H     | 2.213274  | 2.469038  | -0.797348 |
| O     | 0.000000  | 1.546792  | 0.058541  |
| C     | 0.000000  | -1.057056 | 1.238670  |
| H     | 0.000000  | -0.897252 | 2.323282  |
| H     | 0.000000  | -2.136264 | 1.086289  |
| O     | 0.000000  | -2.072536 | -2.044635 |
| H     | -0.760838 | -1.578498 | -1.725214 |
| H     | 0.760838  | -1.578498 | -1.725214 |

Table S16: Cartesian coordinates for the equilibrium structure of the xanthene-H<sub>2</sub>O complex, 1w-III.

| Atoms | X         | Y         | Z         |
|-------|-----------|-----------|-----------|
| C     | -3.348589 | -0.060961 | -1.043776 |
| C     | -2.250652 | -0.910979 | -1.053117 |
| C     | -1.021648 | -0.515560 | -0.529590 |
| C     | -0.914850 | 0.775323  | -0.019764 |

---

| Atoms | X         | Y         | Z         |
|-------|-----------|-----------|-----------|
| C     | -2.003098 | 1.640761  | -0.003838 |
| C     | -3.221852 | 1.218211  | -0.509711 |
| C     | 1.427660  | 0.593486  | 0.231737  |
| C     | 1.442121  | -0.710018 | -0.252883 |
| C     | 2.678582  | -1.292909 | -0.516951 |
| H     | 2.706161  | -2.304337 | -0.901686 |
| C     | 3.863141  | -0.608858 | -0.286775 |
| C     | 3.822006  | 0.688604  | 0.213673  |
| C     | 2.602765  | 1.295126  | 0.468889  |
| H     | -4.294094 | -0.392843 | -1.447556 |
| H     | -2.346441 | -1.910224 | -1.458002 |
| H     | -1.873872 | 2.633003  | 0.403665  |
| H     | -4.069279 | 1.888701  | -0.495052 |
| H     | 4.811493  | -1.083060 | -0.494741 |
| H     | 4.738489  | 1.231146  | 0.397630  |
| H     | 2.541226  | 2.305861  | 0.845443  |
| O     | 0.254570  | 1.258461  | 0.507359  |
| C     | 0.148297  | -1.455388 | -0.437579 |
| H     | 0.198046  | -2.087487 | -1.325551 |
| H     | -0.009165 | -2.130792 | 0.410989  |
| O     | -2.507449 | -1.514493 | 2.287928  |
| H     | -2.332011 | -0.734971 | 2.820245  |
| H     | -2.701937 | -1.172400 | 1.409166  |

---



Table S17: Cartesian coordinates for the equilibrium structure of the xanthene-H<sub>2</sub>O complex, 1w-IV.

| Atoms | X         | Y         | Z         |
|-------|-----------|-----------|-----------|
| C     | -3.564565 | 0.917559  | 0.323836  |
| C     | -2.431494 | 1.472689  | -0.255544 |
| C     | -1.214729 | 0.798519  | -0.248575 |
| C     | -1.161364 | -0.439485 | 0.382539  |
| C     | -2.280678 | -1.012855 | 0.967487  |
| C     | -3.488437 | -0.331438 | 0.930427  |
| C     | 1.200461  | -0.461637 | 0.354235  |
| C     | 1.261090  | 0.775506  | -0.276438 |
| C     | 2.488685  | 1.429106  | -0.308720 |
| H     | 2.553366  | 2.397249  | -0.788178 |
| C     | 3.623211  | 0.853933  | 0.246895  |
| C     | 3.538365  | -0.394309 | 0.853977  |
| C     | 2.320696  | -1.055231 | 0.915530  |
| H     | -4.501409 | 1.455609  | 0.302143  |
| H     | -2.489479 | 2.441960  | -0.733660 |
| H     | -2.188722 | -1.976313 | 1.447818  |
| H     | -4.365064 | -0.770945 | 1.384825  |
| H     | 4.568975  | 1.374888  | 0.205113  |
| H     | 4.417129  | -0.850044 | 1.287649  |
| H     | 2.222966  | -2.019170 | 1.393446  |
| O     | 0.012437  | -1.167894 | 0.431380  |
| C     | 0.020605  | 1.326266  | -0.924726 |
| H     | 0.030998  | 2.416263  | -0.909545 |
| H     | 0.005913  | 1.021830  | -1.976973 |

| Atoms | X         | Y         | Z         |
|-------|-----------|-----------|-----------|
| O     | -0.187604 | -1.833961 | -2.488696 |
| H     | -0.093585 | -1.947330 | -1.536256 |
| H     | -1.094147 | -2.084476 | -2.680485 |

## 2.3 Cartesian coordinates of the xanthene-(H<sub>2</sub>O)<sub>2</sub> complexes

Table S18: Cartesian coordinates for the equilibrium structure of the xanthene-(H<sub>2</sub>O)<sub>2</sub> complex, 2w-I.

| Atoms | X         | Y         | Z         |
|-------|-----------|-----------|-----------|
| C     | -3.571893 | -0.231584 | -0.111305 |
| C     | -2.442898 | -0.800362 | -0.685566 |
| C     | -1.234039 | -0.110743 | -0.725978 |
| C     | -1.178143 | 1.151063  | -0.138609 |
| C     | -2.297193 | 1.735954  | 0.439150  |
| C     | -3.498714 | 1.042935  | 0.442154  |
| C     | 1.173432  | 1.154252  | -0.138589 |
| C     | 1.232768  | -0.107469 | -0.725810 |
| C     | 2.443426  | -0.793896 | -0.685188 |
| H     | 2.491601  | -1.787158 | -1.110376 |
| C     | 3.570835  | -0.221954 | -0.110986 |
| C     | 3.494251  | 1.052477  | 0.442234  |
| C     | 2.290909  | 1.742312  | 0.439038  |
| H     | -4.503328 | -0.778908 | -0.094378 |
| H     | -2.488573 | -1.793569 | -1.111207 |

| Atoms | X         | Y         | Z         |
|-------|-----------|-----------|-----------|
| H     | -2.208113 | 2.717428  | 0.881682  |
| H     | -4.373555 | 1.492766  | 0.889779  |
| H     | 4.503720  | -0.766806 | -0.093819 |
| H     | 4.367888  | 1.504719  | 0.889790  |
| H     | 2.199202  | 2.723647  | 0.881337  |
| O     | -0.003358 | 1.869595  | -0.098456 |
| C     | 0.000160  | -0.658756 | -1.388413 |
| H     | -0.000090 | -0.365660 | -2.445174 |
| H     | 0.001567  | -1.746429 | -1.360617 |
| O     | 0.015346  | -3.584087 | 0.126511  |
| H     | 0.011303  | -2.963516 | 0.875492  |
| H     | 0.028241  | -4.460943 | 0.514312  |
| O     | -0.000628 | -1.487643 | 2.042870  |
| H     | 0.759002  | -0.967887 | 1.758746  |
| H     | -0.765541 | -0.976627 | 1.757108  |

Table S19: Cartesian coordinates for the equilibrium structure of the xanthene-(H<sub>2</sub>O)<sub>2</sub> complex, 2w-II.

| Atoms | X         | Y        | Z         |
|-------|-----------|----------|-----------|
| C     | -3.565360 | 1.157604 | 0.335640  |
| C     | -2.412571 | 1.232097 | 1.105247  |
| C     | -1.197019 | 0.742010 | 0.637172  |
| C     | -1.170846 | 0.195664 | -0.640397 |
| C     | -2.309342 | 0.113871 | -1.429078 |
| C     | -3.513474 | 0.591808 | -0.933632 |
| C     | 1.199432  | 0.139796 | -0.672814 |

---

| Atoms | X         | Y         | Z         |
|-------|-----------|-----------|-----------|
| C     | 1.283071  | 0.692702  | 0.599027  |
| C     | 2.529600  | 1.136959  | 1.029468  |
| H     | 2.614425  | 1.576887  | 2.014569  |
| C     | 3.655932  | 1.010822  | 0.228250  |
| C     | 3.545624  | 0.436487  | -1.033513 |
| C     | 2.310289  | 0.004050  | -1.491466 |
| H     | -4.499236 | 1.538572  | 0.723289  |
| H     | -2.452324 | 1.666861  | 2.095413  |
| H     | -2.234600 | -0.310079 | -2.420465 |
| H     | -4.404705 | 0.532864  | -1.542022 |
| H     | 4.614968  | 1.357148  | 0.585954  |
| H     | 4.416854  | 0.333508  | -1.664516 |
| H     | 2.192042  | -0.431764 | -2.473085 |
| O     | -0.005432 | -0.319958 | -1.180612 |
| C     | 0.056644  | 0.744865  | 1.467540  |
| H     | 0.054040  | -0.136672 | 2.116459  |
| H     | 0.082799  | 1.623205  | 2.113263  |
| O     | -0.414861 | -3.106602 | -0.582973 |
| H     | -0.215329 | -2.238766 | -0.964218 |
| H     | -1.365220 | -3.211131 | -0.674269 |
| O     | 0.138813  | -2.496382 | 2.132747  |
| H     | -0.010259 | -2.809760 | 1.223909  |
| H     | 0.768444  | -3.110458 | 2.515139  |

---

Table S20: Cartesian coordinates for the equilibrium structure of the xanthene-(H<sub>2</sub>O)<sub>2</sub> complex, 2w-III.

| Atoms | X         | Y         | Z         |
|-------|-----------|-----------|-----------|
| C     | -4.014902 | -0.139219 | -0.349148 |
| C     | -3.234386 | 0.957698  | -0.014026 |
| C     | -1.861600 | 0.834909  | 0.181184  |
| C     | -1.290611 | -0.420071 | 0.005015  |
| C     | -2.051895 | -1.531288 | -0.331529 |
| C     | -3.420131 | -1.387358 | -0.501316 |
| C     | 0.913542  | 0.470917  | 0.045198  |
| C     | 0.442463  | 1.765605  | 0.226808  |
| C     | 1.347435  | 2.812735  | 0.077314  |
| H     | 0.996677  | 3.828832  | 0.204686  |
| C     | 2.680895  | 2.571436  | -0.219652 |
| C     | 3.125409  | 1.263353  | -0.380674 |
| C     | 2.240762  | 0.202412  | -0.257330 |
| H     | -5.079589 | -0.022461 | -0.491658 |
| H     | -3.693934 | 1.930059  | 0.108110  |
| H     | -1.566051 | -2.487866 | -0.459211 |
| H     | -4.018931 | -2.248066 | -0.763164 |
| H     | 3.368920  | 3.397931  | -0.326249 |
| H     | 4.161464  | 1.062764  | -0.613285 |
| H     | 2.574586  | -0.816284 | -0.400244 |
| O     | 0.066443  | -0.620957 | 0.167651  |
| C     | -0.996685 | 1.990722  | 0.604202  |
| H     | -1.072182 | 2.120757  | 1.690351  |
| H     | -1.363078 | 2.918713  | 0.163638  |

| Atoms | X        | Y         | Z         |
|-------|----------|-----------|-----------|
| O     | 0.921016 | -3.249149 | 0.836119  |
| H     | 0.640743 | -2.332032 | 0.687676  |
| H     | 0.925193 | -3.374177 | 1.787801  |
| O     | 3.470372 | -2.993753 | -0.354229 |
| H     | 2.613797 | -3.237665 | 0.036324  |
| H     | 3.629631 | -3.633259 | -1.051150 |

Table S21: Cartesian coordinates for the equilibrium structure of the xanthene-(H<sub>2</sub>O)<sub>2</sub> complex, 2w-IV.

| Atoms | X         | Y         | Z         |
|-------|-----------|-----------|-----------|
| C     | -4.028370 | -0.135324 | -0.311432 |
| C     | -3.235768 | 0.928617  | 0.095236  |
| C     | -1.856857 | 0.793559  | 0.228024  |
| C     | -1.292572 | -0.438418 | -0.082394 |
| C     | -2.065969 | -1.513571 | -0.498226 |
| C     | -3.439803 | -1.360913 | -0.604392 |
| C     | 0.909868  | 0.447413  | -0.045360 |
| C     | 0.447958  | 1.721380  | 0.261308  |
| C     | 1.347384  | 2.778989  | 0.160511  |
| H     | 1.004208  | 3.780826  | 0.384557  |
| C     | 2.666979  | 2.564218  | -0.209999 |
| C     | 3.103519  | 1.273937  | -0.492156 |
| C     | 2.223534  | 0.204570  | -0.418493 |
| H     | -5.097529 | -0.009376 | -0.403298 |
| H     | -3.690796 | 1.883932  | 0.322970  |
| H     | -1.581606 | -2.446477 | -0.749225 |

| Atoms | X         | Y         | Z         |
|-------|-----------|-----------|-----------|
| H     | -4.047280 | -2.193680 | -0.929068 |
| H     | 3.351252  | 3.397840  | -0.278446 |
| H     | 4.129607  | 1.096788  | -0.781568 |
| H     | 2.545195  | -0.803052 | -0.644894 |
| O     | 0.066444  | -0.652495 | 0.016645  |
| C     | -0.973888 | 1.908823  | 0.717882  |
| H     | -1.002722 | 1.938944  | 1.813516  |
| H     | -1.357522 | 2.871846  | 0.379047  |
| O     | 3.313390  | -3.077676 | -0.504257 |
| H     | 4.133310  | -3.250120 | -0.037094 |
| H     | 2.611097  | -3.180804 | 0.160010  |
| O     | 1.132125  | -2.977396 | 1.290809  |
| H     | 0.456218  | -3.649979 | 1.396737  |
| H     | 0.689193  | -2.207431 | 0.901584  |

## 2.4 Cartesian coordinates of the xanthene-(H<sub>2</sub>O)<sub>3</sub> complexes

Table S22: Cartesian coordinates for the equilibrium structure of the xanthene-(H<sub>2</sub>O)<sub>3</sub> complex, 3w-I.

| Atoms | X         | Y         | Z         |
|-------|-----------|-----------|-----------|
| C     | -3.541436 | -0.268923 | 0.613034  |
| C     | -2.406930 | -0.034206 | 1.376361  |
| C     | -1.157419 | -0.499082 | 0.978192  |
| C     | -1.072164 | -1.192539 | -0.224587 |

---

| Atoms | X         | Y         | Z         |
|-------|-----------|-----------|-----------|
| C     | -2.195660 | -1.437176 | -1.005297 |
| C     | -3.433910 | -0.977677 | -0.580289 |
| C     | 1.281775  | -1.085059 | -0.242701 |
| C     | 1.320180  | -0.380179 | 0.956026  |
| C     | 2.525774  | 0.206668  | 1.328965  |
| H     | 2.563866  | 0.776298  | 2.248062  |
| C     | 3.664585  | 0.078002  | 0.546647  |
| C     | 3.606059  | -0.646661 | -0.639822 |
| C     | 2.410950  | -1.225811 | -1.041061 |
| H     | -4.501604 | 0.102048  | 0.940995  |
| H     | -2.482869 | 0.527471  | 2.297732  |
| H     | -2.080643 | -1.977260 | -1.933866 |
| H     | -4.310430 | -1.165780 | -1.183976 |
| H     | 4.589716  | 0.542316  | 0.855969  |
| H     | 4.486056  | -0.752733 | -1.258162 |
| H     | 2.332689  | -1.780342 | -1.964996 |
| O     | 0.125239  | -1.661520 | -0.709818 |
| C     | 0.081191  | -0.279631 | 1.802007  |
| H     | 0.124402  | -1.027751 | 2.602077  |
| H     | 0.036806  | 0.697183  | 2.281500  |
| O     | -1.706870 | 2.057926  | -1.439337 |
| H     | -0.818727 | 1.868875  | -1.789752 |
| H     | -2.154904 | 1.209002  | -1.373074 |
| O     | -0.276382 | 2.838405  | 0.791911  |
| H     | -0.309993 | 3.789329  | 0.916519  |
| H     | -0.972580 | 2.632440  | 0.134038  |

---



| Atoms | X        | Y        | Z         |
|-------|----------|----------|-----------|
| O     | 1.098140 | 2.007485 | -1.580437 |
| H     | 0.957555 | 2.282843 | -0.659609 |
| H     | 1.705353 | 1.262951 | -1.539696 |

Table S23: Cartesian coordinates for the equilibrium structure of the xanthene-(H<sub>2</sub>O)<sub>3</sub> complex, 3w-II.

| Atoms | X         | Y         | Z         |
|-------|-----------|-----------|-----------|
| C     | -4.098186 | -0.137228 | -0.586689 |
| C     | -2.953003 | -0.304123 | -1.351882 |
| C     | -1.688924 | -0.322161 | -0.768832 |
| C     | -1.613098 | -0.189162 | 0.612271  |
| C     | -2.744722 | -0.021342 | 1.397393  |
| C     | -3.991284 | 0.010360  | 0.792198  |
| C     | 0.684594  | -0.766055 | 0.639864  |
| C     | 0.723474  | -0.918878 | -0.741923 |
| C     | 1.870926  | -1.473991 | -1.300454 |
| H     | 1.918453  | -1.600959 | -2.374051 |
| C     | 2.951828  | -1.846021 | -0.512289 |
| C     | 2.889283  | -1.675419 | 0.868236  |
| C     | 1.749567  | -1.139341 | 1.448311  |
| H     | -5.068399 | -0.121237 | -1.061980 |
| H     | -3.032919 | -0.413740 | -2.425652 |
| H     | -2.632620 | 0.076917  | 2.467443  |
| H     | -4.876938 | 0.141610  | 1.397308  |
| H     | 3.834498  | -2.270141 | -0.968914 |
| H     | 3.722493  | -1.965174 | 1.492374  |

| Atoms | X         | Y         | Z         |
|-------|-----------|-----------|-----------|
| H     | 1.672093  | -0.999681 | 2.516736  |
| O     | -0.400230 | -0.203530 | 1.277392  |
| C     | -0.427918 | -0.437115 | -1.580308 |
| H     | -0.173107 | 0.544755  | -1.991882 |
| H     | -0.583074 | -1.105346 | -2.428544 |
| O     | 3.186328  | 1.704427  | -0.078357 |
| H     | 2.585352  | 1.894273  | 0.665580  |
| H     | 3.329397  | 0.753046  | -0.056888 |
| O     | 0.892484  | 2.496228  | 1.367223  |
| H     | 0.650472  | 2.748385  | 0.461847  |
| H     | 0.319050  | 1.751330  | 1.579580  |
| O     | 1.010468  | 2.600938  | -1.501059 |
| H     | 1.887990  | 2.262879  | -1.226102 |
| H     | 1.178847  | 3.373660  | -2.044113 |

Table S24: Cartesian coordinates for the equilibrium structure of the xanthene-(H<sub>2</sub>O)<sub>3</sub> complex, 3w-III.

| Atoms | X         | Y         | Z         |
|-------|-----------|-----------|-----------|
| C     | -3.018170 | -1.707799 | -0.683355 |
| C     | -1.932794 | -1.265799 | -1.428404 |
| C     | -0.763782 | -0.823078 | -0.815837 |
| C     | -0.708785 | -0.856700 | 0.573466  |
| C     | -1.778864 | -1.302444 | 1.337691  |
| C     | -2.938929 | -1.723266 | 0.706701  |
| C     | 1.598173  | -0.312733 | 0.596817  |
| C     | 1.659840  | -0.262679 | -0.790403 |

---

| Atoms | X         | Y         | Z         |
|-------|-----------|-----------|-----------|
| C     | 2.918150  | -0.164259 | -1.378444 |
| H     | 2.986914  | -0.130661 | -2.458069 |
| C     | 4.071209  | -0.096972 | -0.610251 |
| C     | 3.978627  | -0.133395 | 0.777179  |
| C     | 2.738565  | -0.247519 | 1.385137  |
| H     | -3.916676 | -2.042530 | -1.181551 |
| H     | -1.992819 | -1.248709 | -2.508805 |
| H     | -1.688502 | -1.307857 | 2.414191  |
| H     | -3.775937 | -2.067205 | 1.297286  |
| H     | 5.036263  | -0.015713 | -1.089359 |
| H     | 4.870415  | -0.081035 | 1.385269  |
| H     | 2.637489  | -0.291298 | 2.459923  |
| O     | 0.394945  | -0.415335 | 1.269897  |
| C     | 0.393763  | -0.273117 | -1.602313 |
| H     | 0.155257  | 0.749219  | -1.911864 |
| H     | 0.536618  | -0.852635 | -2.515817 |
| O     | -0.867607 | 2.820114  | -1.216765 |
| H     | -0.605504 | 2.787873  | -0.273129 |
| H     | -0.786126 | 3.736974  | -1.487222 |
| O     | -3.151910 | 1.755455  | 0.123665  |
| H     | -3.308203 | 0.826390  | -0.072281 |
| H     | -2.596363 | 2.086535  | -0.600780 |
| O     | -0.762342 | 2.355600  | 1.492088  |
| H     | -0.278237 | 1.560450  | 1.739323  |
| H     | -1.675863 | 2.061942  | 1.320645  |

---

Table S25: Cartesian coordinates for the equilibrium structure of the xanthene-(H<sub>2</sub>O)<sub>3</sub> complex, 3w-IV.

| Atoms | X         | Y         | Z         |
|-------|-----------|-----------|-----------|
| C     | -3.485900 | -0.854566 | -0.451862 |
| C     | -2.326750 | -1.343139 | -1.041743 |
| C     | -1.097876 | -1.259107 | -0.392848 |
| C     | -1.057598 | -0.649173 | 0.857490  |
| C     | -2.205781 | -0.157706 | 1.464243  |
| C     | -3.421612 | -0.267800 | 0.809589  |
| C     | 1.288077  | -0.505102 | 0.829323  |
| C     | 1.374581  | -1.112548 | -0.420178 |
| C     | 2.588570  | -1.044592 | -1.099606 |
| H     | 2.667514  | -1.502567 | -2.077212 |
| C     | 3.690053  | -0.409294 | -0.541082 |
| C     | 3.582531  | 0.174714  | 0.717414  |
| C     | 2.378773  | 0.134432  | 1.402866  |
| H     | -4.431288 | -0.933263 | -0.969048 |
| H     | -2.372295 | -1.805143 | -2.019573 |
| H     | -2.121198 | 0.321634  | 2.427955  |
| H     | -4.316996 | 0.118919  | 1.274874  |
| H     | 4.623272  | -0.367617 | -1.083779 |
| H     | 4.432068  | 0.676734  | 1.157940  |
| H     | 2.258528  | 0.606128  | 2.366733  |
| O     | 0.118734  | -0.499393 | 1.547734  |
| C     | 0.169918  | -1.822340 | -0.975350 |
| H     | 0.153793  | -1.752361 | -2.063489 |
| H     | 0.235228  | -2.890966 | -0.738763 |

| Atoms | X         | Y        | Z         |
|-------|-----------|----------|-----------|
| O     | -1.835142 | 2.105577 | -1.346517 |
| H     | -0.950611 | 1.936150 | -1.716102 |
| H     | -2.267244 | 1.247881 | -1.284013 |
| O     | 0.974458  | 2.046029 | -1.563072 |
| H     | 0.842226  | 2.392616 | -0.663659 |
| H     | 1.544781  | 1.278497 | -1.460695 |
| O     | -0.294506 | 2.827463 | 0.840314  |
| H     | -0.395001 | 3.746038 | 1.098501  |
| H     | -1.039683 | 2.635434 | 0.236409  |

## 2.5 Cartesian coordinates of the xanthene-(H<sub>2</sub>O)<sub>4</sub> complexes

Table S26: Cartesian coordinates for the equilibrium structure of the xanthene-(H<sub>2</sub>O)<sub>4</sub> complex, 4w-I.

| Atoms | X         | Y        | Z         |
|-------|-----------|----------|-----------|
| C     | -3.612773 | 0.583326 | 0.633710  |
| C     | -2.467894 | 0.616203 | 1.417641  |
| C     | -1.221576 | 0.904916 | 0.869642  |
| C     | -1.150900 | 1.146463 | -0.498647 |
| C     | -2.284910 | 1.116725 | -1.301590 |
| C     | -3.517591 | 0.839638 | -0.732532 |
| C     | 1.207322  | 1.117551 | -0.494176 |
| C     | 1.266257  | 0.873293 | 0.874273  |
| C     | 2.503701  | 0.554433 | 1.426908  |

---

| Atoms | X         | Y         | Z         |
|-------|-----------|-----------|-----------|
| H     | 2.561979  | 0.349011  | 2.487802  |
| C     | 3.650425  | 0.492212  | 0.646387  |
| C     | 3.566204  | 0.750890  | -0.720037 |
| C     | 2.343419  | 1.059592  | -1.292631 |
| H     | -4.570468 | 0.360004  | 1.081295  |
| H     | -2.534290 | 0.408805  | 2.477478  |
| H     | -2.177618 | 1.297725  | -2.360735 |
| H     | -4.401202 | 0.814400  | -1.354308 |
| H     | 4.601023  | 0.246891  | 1.097755  |
| H     | 4.450890  | 0.702700  | -1.338814 |
| H     | 2.244570  | 1.243646  | -2.352067 |
| O     | 0.033106  | 1.421863  | -1.132379 |
| C     | 0.021646  | 0.965966  | 1.713477  |
| H     | 0.008722  | 0.156507  | 2.443648  |
| H     | 0.032547  | 1.903773  | 2.280584  |
| O     | -1.980910 | -2.336954 | -0.292905 |
| H     | -1.369870 | -2.197840 | -1.047565 |
| H     | -2.551188 | -1.562329 | -0.269345 |
| O     | -0.145894 | -2.402007 | 1.693677  |
| H     | -0.890555 | -2.389013 | 1.044764  |
| H     | -0.250810 | -3.212394 | 2.196343  |
| O     | 0.009773  | -1.912541 | -2.128696 |
| H     | 0.771972  | -2.067276 | -1.524401 |
| H     | 0.135486  | -2.503246 | -2.873594 |
| O     | 1.869000  | -2.376495 | -0.206370 |
| H     | 1.258586  | -2.407563 | 0.558377  |

---

| Atoms | X        | Y         | Z         |
|-------|----------|-----------|-----------|
| H     | 2.479540 | -1.656552 | -0.019814 |

Table S27: Cartesian coordinates for the equilibrium structure of the xanthene-(H<sub>2</sub>O)<sub>4</sub> complex, 4w-II.

| Atoms | X         | Y        | Z         |
|-------|-----------|----------|-----------|
| C     | -3.672860 | 0.587350 | 0.693746  |
| C     | -2.516735 | 0.568899 | 1.460543  |
| C     | -1.264899 | 0.810326 | 0.899055  |
| C     | -1.207788 | 1.064139 | -0.466065 |
| C     | -2.354412 | 1.095394 | -1.251199 |
| C     | -3.588503 | 0.857099 | -0.669952 |
| C     | 1.166802  | 1.083061 | -0.468728 |
| C     | 1.231157  | 0.834978 | 0.897142  |
| C     | 2.487770  | 0.618635 | 1.457434  |
| H     | 2.553265  | 0.408908 | 2.516978  |
| C     | 3.641992  | 0.654290 | 0.688771  |
| C     | 3.550475  | 0.915895 | -0.676225 |
| C     | 2.311252  | 1.129868 | -1.256445 |
| H     | -4.631518 | 0.395521 | 1.153567  |
| H     | -2.576775 | 0.354956 | 2.519634  |
| H     | -2.259417 | 1.295488 | -2.308657 |
| H     | -4.480556 | 0.875603 | -1.279398 |
| H     | 4.604791  | 0.481899 | 1.147701  |
| H     | 4.441053  | 0.947543 | -1.287372 |
| H     | 2.210715  | 1.323433 | -2.314577 |
| O     | -0.022826 | 1.271845 | -1.133563 |

| Atoms | X         | Y         | Z         |
|-------|-----------|-----------|-----------|
| C     | -0.015951 | 0.790141  | 1.735750  |
| H     | -0.006176 | -0.112332 | 2.348830  |
| H     | -0.024034 | 1.639973  | 2.426174  |
| O     | 0.044179  | -1.682420 | -2.187207 |
| H     | -0.030994 | -0.730852 | -2.297328 |
| H     | -0.731604 | -1.941384 | -1.644291 |
| O     | 1.974607  | -2.351784 | -0.345250 |
| H     | 2.597903  | -1.625674 | -0.252141 |
| H     | 1.397790  | -2.116234 | -1.104789 |
| O     | -1.911917 | -2.387975 | -0.366527 |
| H     | -2.531582 | -1.683335 | -0.156750 |
| H     | -1.326843 | -2.468749 | 0.413112  |
| O     | 0.076103  | -2.552868 | 1.570951  |
| H     | 0.176804  | -3.404179 | 2.002050  |
| H     | 0.834365  | -2.480265 | 0.942257  |

Table S28: Cartesian coordinates for the equilibrium structure of the xanthene-(H<sub>2</sub>O)<sub>4</sub> complex, 4w-III.

| Atoms | X         | Y         | Z         |
|-------|-----------|-----------|-----------|
| C     | -4.382454 | 0.015360  | 0.387042  |
| C     | -3.342825 | 0.695548  | 1.004630  |
| C     | -2.035360 | 0.598786  | 0.536705  |
| C     | -1.807474 | -0.185693 | -0.587401 |
| C     | -2.831954 | -0.874469 | -1.221176 |
| C     | -4.122892 | -0.776879 | -0.726251 |
| C     | 0.415477  | 0.607267  | -0.812783 |



---

| Atoms | X         | Y         | Z         |
|-------|-----------|-----------|-----------|
| C     | 0.291427  | 1.435344  | 0.297699  |
| C     | 1.303026  | 2.362797  | 0.530817  |
| H     | 1.218473  | 3.022673  | 1.384484  |
| C     | 2.414803  | 2.443021  | -0.298645 |
| C     | 2.524815  | 1.583074  | -1.388008 |
| C     | 1.520539  | 0.665773  | -1.650385 |
| H     | -5.388683 | 0.101274  | 0.771288  |
| H     | -3.540768 | 1.308743  | 1.874305  |
| H     | -2.604423 | -1.471201 | -2.092653 |
| H     | -4.925059 | -1.311707 | -1.214423 |
| H     | 3.188124  | 3.170874  | -0.098376 |
| H     | 3.390037  | 1.627242  | -2.033425 |
| H     | 1.584284  | -0.012719 | -2.487898 |
| O     | -0.543963 | -0.331703 | -1.127852 |
| C     | -0.879992 | 1.271234  | 1.225225  |
| H     | -0.565460 | 0.657442  | 2.075149  |
| H     | -1.186799 | 2.238496  | 1.625321  |
| O     | 0.732514  | -2.774183 | -0.121342 |
| H     | 1.665002  | -2.690308 | -0.409124 |
| H     | 0.237266  | -2.174528 | -0.691602 |
| O     | 0.865456  | -1.441639 | 2.226001  |
| H     | 0.740027  | -1.996464 | 1.417919  |
| H     | 0.779559  | -2.034021 | 2.975454  |
| O     | 3.360238  | -2.164421 | -0.692338 |
| H     | 3.461309  | -1.508839 | 0.034975  |
| H     | 4.087287  | -2.783275 | -0.600781 |

---

| Atoms | X        | Y         | Z        |
|-------|----------|-----------|----------|
| O     | 3.301358 | -0.412856 | 1.401234 |
| H     | 2.470935 | -0.717888 | 1.820008 |
| H     | 3.112441 | 0.472940  | 1.074644 |

Table S29: Cartesian coordinates for the equilibrium structure of the xanthene-(H<sub>2</sub>O)<sub>4</sub> complex, 4w-IV.

| Atoms | X         | Y         | Z         |
|-------|-----------|-----------|-----------|
| C     | -4.405609 | -0.003983 | -0.389730 |
| C     | -3.368173 | 0.684990  | -1.001868 |
| C     | -2.058411 | 0.575246  | -0.544089 |
| C     | -1.825844 | -0.229430 | 0.564846  |
| C     | -2.847629 | -0.926651 | 1.192953  |
| C     | -4.141365 | -0.816988 | 0.707241  |
| C     | 0.387002  | 0.579421  | 0.811608  |
| C     | 0.256118  | 1.429783  | -0.281231 |
| C     | 1.246735  | 2.386267  | -0.481329 |
| H     | 1.156699  | 3.063201  | -1.320883 |
| C     | 2.346448  | 2.473700  | 0.363537  |
| C     | 2.465329  | 1.590837  | 1.433615  |
| C     | 1.480849  | 0.642942  | 1.662697  |
| H     | -5.414036 | 0.091348  | -0.765936 |
| H     | -3.570115 | 1.314381  | -1.858928 |
| H     | -2.616685 | -1.538832 | 2.052754  |
| H     | -4.942087 | -1.358407 | 1.190540  |
| H     | 3.103594  | 3.225204  | 0.190383  |
| H     | 3.321777  | 1.640897  | 2.090311  |

| Atoms | X         | Y         | Z         |
|-------|-----------|-----------|-----------|
| H     | 1.551262  | -0.053095 | 2.485109  |
| O     | -0.557202 | -0.386735 | 1.091386  |
| C     | -0.901098 | 1.253019  | -1.224086 |
| H     | -1.209902 | 2.215240  | -1.634068 |
| H     | -0.569767 | 0.636577  | -2.066145 |
| O     | 3.349665  | -0.319717 | -1.345583 |
| H     | 3.505030  | -0.947675 | -0.608611 |
| H     | 3.213078  | 0.536358  | -0.926872 |
| O     | 1.027708  | -1.337058 | -2.289893 |
| H     | 1.884233  | -0.914499 | -2.040084 |
| H     | 1.176501  | -1.767468 | -3.134163 |
| O     | 3.387349  | -2.158724 | 0.692390  |
| H     | 2.465226  | -2.480090 | 0.560995  |
| H     | 3.946864  | -2.937562 | 0.708293  |
| O     | 0.813909  | -2.784498 | 0.074945  |
| H     | 0.794720  | -2.394020 | -0.821733 |
| H     | 0.226530  | -2.218812 | 0.589625  |

### 3 Measured rotational transitions

#### 3.1 Frequency lists of the xanthene monomer

Table S30: Assigned rotational transitions for the monomer of xanthene.

| $J'$ | $K_a'$ | $K_c'$ | $v'$ | $J''$ | $K_a''$ | $K_c''$ | $v''$ | $\nu_{obs}/\text{MHz}$ | $\nu_{calc}/\text{MHz}$ | $\Delta\nu/\text{kHz}$ |
|------|--------|--------|------|-------|---------|---------|-------|------------------------|-------------------------|------------------------|
| 4    | 1      | 3      | 1    | 4     | 0       | 4       | 1     | 2046.611               | 2046.607                | 3.8                    |
| 4    | 1      | 3      | 0    | 4     | 0       | 4       | 0     | 2047.879               | 2047.879                | -0.2                   |
| 5    | 1      | 4      | 1    | 5     | 0       | 5       | 1     | 2294.234               | 2294.224                | 10.0                   |
| 5    | 1      | 4      | 0    | 5     | 0       | 5       | 0     | 2295.528               | 2295.531                | -3.8                   |
| 1    | 1      | 1      | 1    | 0     | 0       | 0       | 1     | 2416.288               | 2416.292                | -4.4                   |
| 1    | 1      | 1      | 0    | 0     | 0       | 0       | 0     | 2417.235               | 2417.235                | -0.7                   |
| 6    | 1      | 5      | 0    | 6     | 0       | 6       | 0     | 2613.765               | 2613.773                | -8.5                   |
| 5    | 0      | 5      | 0    | 4     | 1       | 4       | 0     | 2955.548               | 2955.544                | 3.9                    |
| 5    | 0      | 5      | 1    | 4     | 1       | 4       | 1     | 2957.739               | 2957.747                | -7.8                   |
| 7    | 1      | 6      | 0    | 7     | 0       | 7       | 0     | 3010.105               | 3010.129                | -23.9                  |
| 2    | 1      | 2      | 1    | 1     | 0       | 1       | 1     | 3186.790               | 3186.795                | -5.5                   |
| 2    | 1      | 2      | 0    | 1     | 0       | 1       | 0     | 3187.485               | 3187.487                | -2.0                   |
| 3    | 1      | 3      | 1    | 2     | 0       | 2       | 1     | 3918.073               | 3918.069                | 4.1                    |
| 3    | 1      | 3      | 0    | 2     | 0       | 2       | 0     | 3918.502               | 3918.503                | -1.3                   |
| 6    | 0      | 6      | 0    | 5     | 1       | 5       | 0     | 3919.075               | 3919.068                | 6.6                    |
| 6    | 0      | 6      | 1    | 5     | 1       | 5       | 1     | 3921.402               | 3921.404                | -2.2                   |
| 6    | 2      | 4      | 1    | 6     | 1       | 5       | 1     | 4200.993               | 4200.995                | -2.1                   |
| 6    | 2      | 4      | 0    | 6     | 1       | 5       | 0     | 4204.315               | 4204.306                | 8.5                    |
| 5    | 2      | 3      | 1    | 5     | 1       | 4       | 1     | 4328.484               | 4328.482                | 1.7                    |
| 5    | 2      | 3      | 0    | 5     | 1       | 4       | 0     | 4331.879               | 4331.877                | 2.5                    |
| 4    | 2      | 2      | 1    | 4     | 1       | 3       | 1     | 4463.460               | 4463.456                | 4.6                    |
| 4    | 2      | 2      | 0    | 4     | 1       | 3       | 0     | 4466.910               | 4466.914                | -3.1                   |
| 3    | 2      | 1      | 1    | 3     | 1       | 2       | 1     | 4590.885               | 4590.885                | 0.2                    |
| 3    | 2      | 1      | 0    | 3     | 1       | 2       | 0     | 4594.387               | 4594.388                | -1.3                   |

| J' | K <sub>a</sub> ' | K <sub>c</sub> ' | v' | J'' | K <sub>a</sub> '' | K <sub>c</sub> '' | v'' | $\nu_{obs}/\text{MHz}$ | $\nu_{calc}/\text{MHz}$ | $\Delta\nu/\text{kHz}$ |
|----|------------------|------------------|----|-----|-------------------|-------------------|-----|------------------------|-------------------------|------------------------|
| 4  | 1                | 4                | 0  | 3   | 0                 | 3                 | 0   | 4614.206               | 4614.206                | -0.3                   |
| 2  | 2                | 0                | 1  | 2   | 1                 | 1                 | 1   | 4697.981               | 4697.980                | 1.7                    |
| 2  | 2                | 0                | 0  | 2   | 1                 | 1                 | 0   | 4701.513               | 4701.514                | -1.1                   |
| 7  | 0                | 7                | 0  | 6   | 1                 | 6                 | 0   | 4876.953               | 4876.948                | 5.2                    |
| 7  | 0                | 7                | 1  | 6   | 1                 | 6                 | 1   | 4879.390               | 4879.387                | 2.9                    |
| 2  | 2                | 1                | 1  | 2   | 1                 | 2                 | 1   | 4937.351               | 4937.350                | 0.9                    |
| 2  | 2                | 1                | 0  | 2   | 1                 | 2                 | 0   | 4940.950               | 4940.941                | 9.1                    |
| 3  | 2                | 2                | 1  | 3   | 1                 | 3                 | 1   | 5060.431               | 5060.435                | -3.8                   |
| 3  | 2                | 2                | 0  | 3   | 1                 | 3                 | 0   | 5064.063               | 5064.054                | 8.8                    |
| 4  | 2                | 3                | 1  | 4   | 1                 | 4                 | 1   | 5225.558               | 5225.570                | -12.2                  |
| 4  | 2                | 3                | 0  | 4   | 1                 | 4                 | 0   | 5229.241               | 5229.226                | 14.6                   |
| 5  | 1                | 5                | 0  | 4   | 0                 | 4                 | 0   | 5280.838               | 5280.840                | -2.3                   |
| 8  | 0                | 8                | 0  | 7   | 1                 | 7                 | 0   | 5820.403               | 5820.390                | 12.7                   |
| 8  | 0                | 8                | 1  | 7   | 1                 | 7                 | 1   | 5822.910               | 5822.903                | 6.4                    |
| 6  | 1                | 6                | 0  | 5   | 0                 | 5                 | 0   | 5926.679               | 5926.690                | -10.5                  |
| 2  | 2                | 1                | 1  | 1   | 1                 | 0                 | 1   | 6478.351               | 6478.359                | -7.8                   |
| 2  | 2                | 1                | 0  | 1   | 1                 | 0                 | 0   | 6481.442               | 6481.443                | -1.4                   |
| 7  | 1                | 7                | 0  | 6   | 0                 | 6                 | 0   | 6561.381               | 6561.395                | -13.9                  |
| 2  | 2                | 0                | 0  | 1   | 1                 | 1                 | 0   | 6565.318               | 6565.316                | 2.0                    |
| 9  | 0                | 9                | 0  | 8   | 1                 | 8                 | 0   | 6743.230               | 6743.222                | 8.5                    |
| 9  | 0                | 9                | 1  | 8   | 1                 | 8                 | 1   | 6745.779               | 6745.784                | -4.8                   |
| 8  | 1                | 8                | 0  | 7   | 0                 | 7                 | 0   | 7194.797               | 7194.811                | -14.0                  |
| 10 | 3                | 7                | 1  | 10  | 2                 | 8                 | 1   | 7239.904               | 7239.903                | 0.5                    |
| 10 | 3                | 7                | 0  | 10  | 2                 | 8                 | 0   | 7245.893               | 7245.876                | 17.0                   |
| 3  | 2                | 2                | 1  | 2   | 1                 | 1                 | 1   | 7248.859               | 7248.860                | -1.3                   |
| 3  | 2                | 2                | 0  | 2   | 1                 | 1                 | 0   | 7251.700               | 7251.698                | 1.5                    |

| J' | K <sub>a</sub> ' | K <sub>c</sub> ' | v' | J'' | K <sub>a</sub> '' | K <sub>c</sub> '' | v'' | $\nu_{obs}/\text{MHz}$ | $\nu_{calc}/\text{MHz}$ | $\Delta\nu/\text{kHz}$ |
|----|------------------|------------------|----|-----|-------------------|-------------------|-----|------------------------|-------------------------|------------------------|
| 9  | 3                | 6                | 1  | 9   | 2                 | 7                 | 1   | 7452.803               | 7452.806                | -2.6                   |
| 9  | 3                | 6                | 0  | 9   | 2                 | 7                 | 0   | 7458.806               | 7458.807                | -1.1                   |
| 3  | 2                | 1                | 1  | 2   | 1                 | 2                 | 1   | 7506.497               | 7506.496                | 0.6                    |
| 3  | 2                | 1                | 0  | 2   | 1                 | 2                 | 0   | 7509.396               | 7509.386                | 10.0                   |
| 8  | 3                | 5                | 1  | 8   | 2                 | 6                 | 1   | 7633.595               | 7633.593                | 1.5                    |
| 8  | 3                | 5                | 0  | 8   | 2                 | 6                 | 0   | 7639.585               | 7639.596                | -10.6                  |
| 10 | 0                | 10               | 0  | 9   | 1                 | 9                 | 0   | 7642.391               | 7642.385                | 5.7                    |
| 7  | 3                | 4                | 1  | 7   | 2                 | 5                 | 1   | 7776.445               | 7776.442                | 2.8                    |
| 7  | 3                | 4                | 0  | 7   | 2                 | 5                 | 0   | 7782.434               | 7782.431                | 2.4                    |
| 9  | 1                | 9                | 0  | 8   | 0                 | 8                 | 0   | 7835.620               | 7835.632                | -11.4                  |
| 6  | 3                | 3                | 1  | 6   | 2                 | 4                 | 1   | 7880.760               | 7880.766                | -6.1                   |
| 6  | 3                | 3                | 0  | 6   | 2                 | 4                 | 0   | 7886.728               | 7886.737                | -9.4                   |
| 5  | 3                | 2                | 1  | 5   | 2                 | 3                 | 1   | 7950.400               | 7950.400                | -0.3                   |
| 5  | 3                | 2                | 0  | 5   | 2                 | 3                 | 0   | 7956.349               | 7956.354                | -5.7                   |
| 4  | 2                | 3                | 1  | 3   | 1                 | 2                 | 1   | 7978.534               | 7978.523                | 11.1                   |
| 4  | 2                | 3                | 0  | 3   | 1                 | 2                 | 0   | 7981.120               | 7981.112                | 7.5                    |
| 4  | 3                | 1                | 1  | 4   | 2                 | 2                 | 1   | 7992.064               | 7992.059                | 5.4                    |
| 4  | 3                | 1                | 0  | 4   | 2                 | 2                 | 0   | 7997.997               | 7998.001                | -4.2                   |

Table S31: Assigned rotational transitions for the  $^{13}\text{C}_1$  isotopologue of the monomer of xanthene.

| J' | K <sub>a</sub> ' | K <sub>c</sub> ' | v' | J'' | K <sub>a</sub> '' | K <sub>c</sub> '' | v'' | $\nu_{obs}/\text{MHz}$ | $\nu_{calc}/\text{MHz}$ | $\Delta\nu/\text{kHz}$ |
|----|------------------|------------------|----|-----|-------------------|-------------------|-----|------------------------|-------------------------|------------------------|
| 4  | 1                | 3                | 0  | 4   | 0                 | 4                 | 0   | 2033.777               | 2033.785                | -7.8                   |
| 5  | 1                | 4                | 0  | 5   | 0                 | 5                 | 0   | 2280.679               | 2280.695                | -16.4                  |

| J' | K <sub>a</sub> ' | K <sub>c</sub> ' | v' | J'' | K <sub>a</sub> '' | K <sub>c</sub> '' | v'' | $\nu_{obs}/\text{MHz}$ | $\nu_{calc}/\text{MHz}$ | $\Delta\nu/\text{kHz}$ |
|----|------------------|------------------|----|-----|-------------------|-------------------|-----|------------------------|-------------------------|------------------------|
| 1  | 1                | 1                | 0  | 0   | 0                 | 0                 | 0   | 2399.780               | 2399.786                | -6.3                   |
| 2  | 1                | 2                | 0  | 1   | 0                 | 1                 | 0   | 3165.347               | 3165.348                | -0.6                   |
| 3  | 1                | 3                | 0  | 2   | 0                 | 2                 | 0   | 3891.823               | 3891.825                | -1.8                   |
| 6  | 0                | 6                | 0  | 5   | 1                 | 5                 | 0   | 3899.449               | 3899.455                | -5.9                   |
| 6  | 0                | 6                | 1  | 5   | 1                 | 5                 | 1   | 3901.753               | 3901.746                | 7.5                    |
| 4  | 2                | 2                | 0  | 4   | 1                 | 3                 | 0   | 4430.604               | 4430.605                | -0.7                   |
| 3  | 2                | 1                | 0  | 3   | 1                 | 2                 | 0   | 4557.458               | 4557.466                | -8.1                   |
| 7  | 0                | 7                | 0  | 6   | 1                 | 6                 | 0   | 4851.477               | 4851.470                | 6.8                    |
| 5  | 1                | 5                | 0  | 4   | 0                 | 4                 | 0   | 5245.545               | 5245.544                | 1.3                    |
| 5  | 1                | 5                | 1  | 4   | 0                 | 4                 | 1   | 5246.240               | 5246.237                | 2.4                    |
| 5  | 2                | 4                | 1  | 5   | 1                 | 5                 | 1   | 5393.370               | 5393.370                | 0.1                    |
| 5  | 2                | 4                | 0  | 5   | 1                 | 5                 | 0   | 5397.076               | 5397.052                | 24.6                   |
| 8  | 0                | 8                | 0  | 7   | 1                 | 7                 | 0   | 5788.977               | 5788.977                | 0.1                    |
| 6  | 1                | 6                | 0  | 5   | 0                 | 5                 | 0   | 5887.325               | 5887.317                | 7.4                    |
| 2  | 2                | 1                | 0  | 1   | 1                 | 0                 | 0   | 6433.783               | 6433.786                | -3.0                   |
| 7  | 1                | 7                | 0  | 6   | 0                 | 6                 | 0   | 6518.101               | 6518.094                | 7.2                    |
| 9  | 0                | 9                | 0  | 8   | 1                 | 8                 | 0   | 6705.860               | 6705.862                | -2.1                   |
| 9  | 0                | 9                | 1  | 8   | 1                 | 8                 | 1   | 6708.596               | 6708.603                | -6.4                   |
| 8  | 1                | 8                | 0  | 7   | 0                 | 7                 | 0   | 7147.696               | 7147.705                | -9.3                   |
| 3  | 2                | 2                | 0  | 2   | 1                 | 1                 | 0   | 7199.350               | 7199.351                | -0.7                   |
| 7  | 3                | 4                | 0  | 7   | 2                 | 5                 | 0   | 7719.443               | 7719.446                | -2.4                   |

Table S32: Assigned rotational transitions for the  $^{13}\text{C}_2$  isotopologue of the monomer of xanthene.

| J' | K <sub>a</sub> ' | K <sub>c</sub> ' | v' | J'' | K <sub>a</sub> '' | K <sub>c</sub> '' | v'' | $\nu_{obs}/\text{MHz}$ | $\nu_{calc}/\text{MHz}$ | $\Delta\nu/\text{kHz}$ |
|----|------------------|------------------|----|-----|-------------------|-------------------|-----|------------------------|-------------------------|------------------------|
| 4  | 1                | 3                | 1  | 4   | 0                 | 4                 | 1   | 2042.120               | 2042.107                | 13.14                  |
| 4  | 1                | 3                | 0  | 4   | 0                 | 4                 | 0   | 2043.377               | 2043.379                | -2.21                  |
| 1  | 1                | 1                | 0  | 0   | 0                 | 0                 | 0   | 2411.640               | 2411.650                | -10.15                 |
| 6  | 1                | 5                | 0  | 6   | 0                 | 6                 | 0   | 2609.194               | 2609.207                | -13.24                 |
| 5  | 0                | 5                | 0  | 4   | 1                 | 4                 | 0   | 2953.227               | 2953.218                | 8.68                   |
| 2  | 1                | 2                | 1  | 1   | 0                 | 1                 | 1   | 3180.011               | 3180.006                | 4.71                   |
| 2  | 1                | 2                | 0  | 1   | 0                 | 1                 | 0   | 3180.681               | 3180.684                | -2.74                  |
| 3  | 1                | 3                | 1  | 2   | 0                 | 2                 | 1   | 3910.077               | 3910.086                | -8.67                  |
| 3  | 1                | 3                | 0  | 2   | 0                 | 2                 | 0   | 3910.504               | 3910.506                | -2.22                  |
| 6  | 0                | 6                | 0  | 5   | 1                 | 5                 | 0   | 3915.252               | 3915.244                | 8.02                   |
| 6  | 0                | 6                | 1  | 5   | 1                 | 5                 | 1   | 3917.546               | 3917.547                | -1.33                  |
| 6  | 2                | 4                | 1  | 6   | 1                 | 5                 | 1   | 4188.817               | 4188.825                | -8.48                  |
| 6  | 2                | 4                | 0  | 6   | 1                 | 5                 | 0   | 4192.093               | 4192.085                | 8.11                   |
| 5  | 2                | 3                | 1  | 5   | 1                 | 4                 | 1   | 4316.005               | 4316.009                | -3.22                  |
| 5  | 2                | 3                | 0  | 5   | 1                 | 4                 | 0   | 4319.353               | 4319.351                | 1.99                   |
| 4  | 2                | 2                | 1  | 4   | 1                 | 3                 | 1   | 4450.774               | 4450.767                | 6.58                   |
| 4  | 1                | 4                | 1  | 3   | 0                 | 3                 | 1   | 4604.899               | 4604.887                | 12.13                  |
| 4  | 1                | 4                | 0  | 3   | 0                 | 3                 | 0   | 4605.042               | 4605.044                | -2.82                  |
| 7  | 0                | 7                | 0  | 6   | 1                 | 6                 | 0   | 4871.563               | 4871.555                | 7.13                   |
| 4  | 2                | 3                | 0  | 4   | 1                 | 4                 | 0   | 5215.990               | 5215.983                | 6.52                   |
| 5  | 1                | 5                | 0  | 4   | 0                 | 4                 | 0   | 5270.551               | 5270.554                | -3.12                  |
| 5  | 2                | 4                | 1  | 5   | 1                 | 5                 | 1   | 5420.103               | 5420.105                | -2.2                   |
| 8  | 0                | 8                | 0  | 7   | 1                 | 7                 | 0   | 5813.366               | 5813.371                | -5.45                  |
| 6  | 1                | 6                | 0  | 5   | 0                 | 5                 | 0   | 5915.321               | 5915.332                | -11.81                 |



| J' | K <sub>a</sub> ' | K <sub>c</sub> ' | v' | J'' | K <sub>a</sub> '' | K <sub>c</sub> '' | v'' | $\nu_{obs}/\text{MHz}$ | $\nu_{calc}/\text{MHz}$ | $\Delta\nu/\text{kHz}$ |
|----|------------------|------------------|----|-----|-------------------|-------------------|-----|------------------------|-------------------------|------------------------|
| 2  | 2                | 0                | 1  | 1   | 1                 | 1                 | 1   | 6546.652               | 6546.676                | -24.02                 |
| 7  | 1                | 7                | 0  | 6   | 0                 | 6                 | 0   | 6549.042               | 6549.027                | 14.77                  |
| 8  | 1                | 8                | 0  | 7   | 0                 | 7                 | 0   | 7181.482               | 7181.496                | -13.64                 |
| 3  | 2                | 2                | 1  | 2   | 1                 | 1                 | 1   | 7232.144               | 7232.145                | -0.71                  |
| 3  | 2                | 2                | 0  | 2   | 1                 | 1                 | 0   | 7234.946               | 7234.943                | 2.28                   |
| 3  | 2                | 1                | 1  | 2   | 1                 | 2                 | 1   | 7489.678               | 7489.669                | 8.73                   |
| 3  | 2                | 1                | 0  | 2   | 1                 | 2                 | 0   | 7492.524               | 7492.527                | -3.21                  |
| 7  | 3                | 4                | 1  | 7   | 2                 | 5                 | 1   | 7754.485               | 7754.476                | 9.09                   |
| 7  | 3                | 4                | 0  | 7   | 2                 | 5                 | 0   | 7760.375               | 7760.381                | -5.97                  |
| 5  | 3                | 2                | 0  | 5   | 2                 | 3                 | 0   | 7934.510               | 7934.508                | 1.68                   |
| 4  | 2                | 3                | 0  | 3   | 1                 | 2                 | 0   | 7963.168               | 7963.160                | 7.68                   |
| 4  | 3                | 1                | 0  | 4   | 2                 | 2                 | 0   | 7976.220               | 7976.217                | 3.03                   |

Table S33: Assigned rotational transitions for the  $^{13}\text{C}_3$  isotopologue of the monomer of xanthene.

| J' | K <sub>a</sub> ' | K <sub>c</sub> ' | v' | J'' | K <sub>a</sub> '' | K <sub>c</sub> '' | v'' | $\nu_{obs}/\text{MHz}$ | $\nu_{calc}/\text{MHz}$ | $\Delta\nu/\text{kHz}$ |
|----|------------------|------------------|----|-----|-------------------|-------------------|-----|------------------------|-------------------------|------------------------|
| 4  | 1                | 3                | 0  | 4   | 0                 | 4                 | 0   | 2044.729               | 2044.723                | 5.8                    |
| 1  | 1                | 1                | 1  | 0   | 0                 | 0                 | 1   | 2412.518               | 2412.525                | -6.5                   |
| 1  | 1                | 1                | 0  | 0   | 0                 | 0                 | 0   | 2413.454               | 2413.457                | -3.2                   |
| 6  | 1                | 5                | 0  | 6   | 0                 | 6                 | 0   | 2610.097               | 2610.099                | -1.3                   |
| 2  | 1                | 2                | 1  | 1   | 0                 | 1                 | 1   | 3182.010               | 3182.018                | -8.4                   |
| 2  | 1                | 2                | 0  | 1   | 0                 | 1                 | 0   | 3182.697               | 3182.694                | 3.8                    |
| 3  | 1                | 3                | 1  | 2   | 0                 | 2                 | 1   | 3912.312               | 3912.325                | -13.5                  |
| 3  | 1                | 3                | 0  | 2   | 0                 | 2                 | 0   | 3912.739               | 3912.736                | 2.3                    |

| J' | K <sub>a</sub> ' | K <sub>c</sub> ' | v' | J'' | K <sub>a</sub> '' | K <sub>c</sub> '' | v'' | $\nu_{obs}/\text{MHz}$ | $\nu_{calc}/\text{MHz}$ | $\Delta\nu/\text{kHz}$ |
|----|------------------|------------------|----|-----|-------------------|-------------------|-----|------------------------|-------------------------|------------------------|
| 6  | 0                | 6                | 0  | 5   | 1                 | 5                 | 0   | 3914.653               | 3914.643                | 9.4                    |
| 6  | 0                | 6                | 1  | 5   | 1                 | 5                 | 1   | 3916.960               | 3916.962                | -2.4                   |
| 6  | 2                | 4                | 1  | 6   | 1                 | 5                 | 1   | 4193.656               | 4193.663                | -6.8                   |
| 6  | 2                | 4                | 0  | 6   | 1                 | 5                 | 0   | 4196.949               | 4196.931                | 18.7                   |
| 4  | 1                | 4                | 1  | 3   | 0                 | 3                 | 1   | 4607.355               | 4607.364                | -8.9                   |
| 4  | 1                | 4                | 0  | 3   | 0                 | 3                 | 0   | 4607.509               | 4607.506                | 2.5                    |
| 7  | 0                | 7                | 0  | 6   | 1                 | 6                 | 0   | 4871.260               | 4871.237                | 22.8                   |
| 5  | 1                | 5                | 0  | 4   | 0                 | 4                 | 0   | 5273.245               | 5273.244                | 0.4                    |
| 5  | 1                | 5                | 1  | 4   | 0                 | 4                 | 1   | 5273.394               | 5273.375                | 18.2                   |
| 8  | 0                | 8                | 0  | 7   | 1                 | 7                 | 0   | 5813.366               | 5813.389                | -23.2                  |
| 6  | 1                | 6                | 0  | 5   | 0                 | 5                 | 0   | 5918.228               | 5918.233                | -5.0                   |
| 2  | 2                | 1                | 1  | 1   | 1                 | 0                 | 1   | 6468.058               | 6468.066                | -8.6                   |
| 2  | 2                | 1                | 0  | 1   | 1                 | 0                 | 0   | 6471.123               | 6471.124                | -0.8                   |
| 2  | 2                | 0                | 1  | 1   | 1                 | 1                 | 1   | 6551.846               | 6551.832                | 14.7                   |
| 7  | 1                | 7                | 0  | 6   | 0                 | 6                 | 0   | 6552.100               | 6552.104                | -3.9                   |
| 8  | 1                | 8                | 0  | 7   | 0                 | 7                 | 0   | 7184.712               | 7184.707                | 4.9                    |
| 3  | 2                | 2                | 1  | 2   | 1                 | 1                 | 1   | 7237.563               | 7237.558                | 4.8                    |
| 3  | 2                | 2                | 0  | 2   | 1                 | 1                 | 0   | 7240.353               | 7240.364                | -11.3                  |
| 7  | 3                | 4                | 0  | 7   | 2                 | 5                 | 0   | 7763.028               | 7768.950                | -3.2                   |
| 7  | 3                | 4                | 1  | 7   | 2                 | 5                 | 1   | 7768.947               | 7763.026                | 1.4                    |
| 5  | 3                | 2                | 0  | 5   | 2                 | 3                 | 0   | 7942.785               | 7942.782                | 3.2                    |
| 4  | 2                | 3                | 1  | 3   | 1                 | 2                 | 1   | 7966.254               | 7966.255                | -1.1                   |
| 4  | 3                | 1                | 0  | 4   | 2                 | 2                 | 0   | 7984.408               | 7984.410                | -2.5                   |

Table S34: Assigned rotational transitions for the  $^{13}\text{C}_4$  isotopologue of the monomer of xanthene.

| J' | $K_a'$ | $K_c'$ | $v'$ | J'' | $K_a''$ | $K_c''$ | $v''$ | $\nu_{obs}/\text{MHz}$ | $\nu_{calc}/\text{MHz}$ | $\Delta\nu/\text{kHz}$ |
|----|--------|--------|------|-----|---------|---------|-------|------------------------|-------------------------|------------------------|
| 1  | 1      | 1      | 0    | 0   | 0       | 0       | 0     | 2399.191               | 2399.195                | -4.69                  |
| 1  | 1      | 1      | 1    | 0   | 0       | 0       | 1     | 2398.255               | 2398.271                | -16                    |
| 2  | 1      | 2      | 0    | 1   | 0       | 1       | 0     | 3165.151               | 3165.161                | -9.71                  |
| 3  | 1      | 3      | 1    | 2   | 0       | 2       | 1     | 3891.404               | 3891.380                | 24.14                  |
| 3  | 1      | 3      | 0    | 2   | 0       | 2       | 0     | 3891.975               | 3891.974                | 1.66                   |
| 6  | 0      | 6      | 0    | 5   | 1       | 5       | 0     | 3904.154               | 3904.154                | 0.72                   |
| 6  | 0      | 6      | 1    | 5   | 1       | 5       | 1     | 3906.085               | 3906.087                | -1.71                  |
| 5  | 2      | 3      | 0    | 5   | 1       | 4       | 0     | 4292.540               | 4292.536                | 4.02                   |
| 4  | 2      | 2      | 0    | 4   | 1       | 3       | 0     | 4426.886               | 4426.883                | 2.44                   |
| 4  | 1      | 4      | 1    | 3   | 0       | 3       | 1     | 4583.140               | 4583.138                | 1.95                   |
| 4  | 2      | 3      | 0    | 4   | 1       | 4       | 0     | 5187.451               | 5187.455                | -3.55                  |
| 5  | 1      | 5      | 0    | 4   | 0       | 4       | 0     | 5246.240               | 5246.236                | 3.45                   |
| 5  | 2      | 4      | 0    | 5   | 1       | 5       | 0     | 5395.010               | 5394.997                | 13.18                  |
| 8  | 0      | 8      | 0    | 7   | 1       | 7       | 0     | 5794.491               | 5794.489                | 1.89                   |
| 6  | 1      | 6      | 0    | 5   | 0       | 5       | 0     | 5888.287               | 5888.280                | 7.19                   |
| 2  | 2      | 1      | 0    | 1   | 1       | 0       | 0     | 6431.602               | 6431.608                | -6.42                  |
| 2  | 2      | 0      | 0    | 1   | 1       | 1       | 0     | 6515.335               | 6515.344                | -9.31                  |
| 7  | 1      | 7      | 0    | 6   | 0       | 6       | 0     | 6519.373               | 6519.369                | 4.39                   |
| 7  | 1      | 7      | 1    | 6   | 0       | 6       | 1     | 6519.373               | 6519.406                | -32.27                 |
| 3  | 2      | 2      | 1    | 2   | 1       | 1       | 1     | 7194.797               | 7194.798                | -1.72                  |
| 3  | 2      | 2      | 0    | 2   | 1       | 1       | 0     | 7197.584               | 7197.578                | 6.03                   |
| 3  | 2      | 1      | 0    | 2   | 1       | 2       | 0     | 7454.869               | 7454.881                | -12.14                 |
| 4  | 2      | 3      | 0    | 3   | 1       | 2       | 0     | 7922.790               | 7922.780                | 9.46                   |

Table S35: Assigned rotational transitions for the  $^{13}\text{C}_5$  isotopologue of the monomer of xanthene.

| J' | $K_a'$ | $K_c'$ | $v'$ | J'' | $K_a''$ | $K_c''$ | $v''$ | $\nu_{obs}/\text{MHz}$ | $\nu_{calc}/\text{MHz}$ | $\Delta\nu/\text{kHz}$ |
|----|--------|--------|------|-----|---------|---------|-------|------------------------|-------------------------|------------------------|
| 4  | 1      | 3      | 0    | 4   | 0       | 4       | 0     | 2038.041               | 2038.048                | -7.0                   |
| 1  | 1      | 1      | 1    | 0   | 0       | 0       | 1     | 2407.031               | 2407.038                | -6.6                   |
| 1  | 1      | 1      | 0    | 0   | 0       | 0       | 0     | 2407.975               | 2407.974                | 0.9                    |
| 6  | 1      | 5      | 0    | 6   | 0       | 6       | 0     | 2591.266               | 2591.283                | -16.7                  |
| 5  | 0      | 5      | 0    | 4   | 1       | 4       | 0     | 2906.263               | 2906.255                | 8.4                    |
| 5  | 0      | 5      | 1    | 4   | 1       | 4       | 1     | 2908.423               | 2908.430                | -6.9                   |
| 2  | 1      | 2      | 1    | 1   | 0       | 1       | 1     | 3169.869               | 3169.867                | 2.6                    |
| 2  | 1      | 2      | 0    | 1   | 0       | 1       | 0     | 3170.550               | 3170.552                | -1.9                   |
| 6  | 0      | 6      | 0    | 5   | 1       | 5       | 0     | 3859.936               | 3859.931                | 5.0                    |
| 6  | 0      | 6      | 1    | 5   | 1       | 5       | 1     | 3862.231               | 3862.237                | -5.7                   |
| 3  | 1      | 3      | 1    | 2   | 0       | 2       | 1     | 3894.179               | 3894.187                | -7.9                   |
| 3  | 1      | 3      | 0    | 2   | 0       | 2       | 0     | 3894.614               | 3894.615                | -0.9                   |
| 8  | 2      | 6      | 1    | 8   | 1       | 7       | 1     | 4034.260               | 4034.265                | -5.3                   |
| 7  | 2      | 5      | 1    | 7   | 1       | 6       | 1     | 4101.326               | 4101.333                | -7.0                   |
| 6  | 2      | 4      | 1    | 6   | 1       | 5       | 1     | 4206.137               | 4206.141                | -3.7                   |
| 6  | 2      | 4      | 0    | 6   | 1       | 5       | 0     | 4209.425               | 4209.420                | 4.8                    |
| 5  | 2      | 3      | 1    | 5   | 1       | 4       | 1     | 4333.175               | 4333.178                | -2.8                   |
| 5  | 2      | 3      | 0    | 5   | 1       | 4       | 0     | 4336.537               | 4336.539                | -2.0                   |
| 4  | 2      | 2      | 1    | 4   | 1       | 3       | 1     | 4466.783               | 4466.776                | 6.8                    |
| 4  | 2      | 2      | 0    | 4   | 1       | 3       | 0     | 4470.198               | 4470.200                | -2.1                   |
| 4  | 1      | 4      | 0    | 3   | 0       | 3       | 0     | 4583.936               | 4583.939                | -3.3                   |
| 3  | 2      | 1      | 1    | 3   | 1       | 2       | 1     | 4592.412               | 4592.403                | 8.3                    |

| J' | K <sub>a</sub> ' | K <sub>c</sub> ' | v' | J'' | K <sub>a</sub> '' | K <sub>c</sub> '' | v'' | $\nu_{obs}/\text{MHz}$ | $\nu_{calc}/\text{MHz}$ | $\Delta\nu/\text{kHz}$ |
|----|------------------|------------------|----|-----|-------------------|-------------------|-----|------------------------|-------------------------|------------------------|
| 3  | 2                | 1                | 0  | 3   | 1                 | 2                 | 0   | 4595.874               | 4595.875                | -1.0                   |
| 7  | 0                | 7                | 0  | 6   | 1                 | 6                 | 0   | 4808.673               | 4808.675                | -1.9                   |
| 7  | 0                | 7                | 1  | 6   | 1                 | 6                 | 1   | 4811.079               | 4811.083                | -4.2                   |
| 3  | 2                | 2                | 0  | 3   | 1                 | 3                 | 0   | 5056.918               | 5056.929                | -10.7                  |
| 5  | 1                | 5                | 0  | 4   | 0                 | 4                 | 0   | 5244.539               | 5244.538                | 0.8                    |
| 5  | 1                | 5                | 1  | 4   | 0                 | 4                 | 1   | 5244.648               | 5244.635                | 13.3                   |
| 5  | 2                | 4                | 1  | 5   | 1                 | 5                 | 1   | 5419.103               | 5419.097                | 6.5                    |
| 5  | 2                | 4                | 0  | 5   | 1                 | 5                 | 0   | 5422.814               | 5422.788                | 25.5                   |
| 8  | 0                | 8                | 1  | 7   | 1                 | 7                 | 1   | 5746.308               | 5746.293                | 14.8                   |
| 6  | 1                | 6                | 0  | 5   | 0                 | 5                 | 0   | 5884.413               | 5884.406                | 6.5                    |
| 2  | 2                | 1                | 0  | 1   | 1                 | 0                 | 0   | 6461.315               | 6461.333                | -18.1                  |
| 7  | 1                | 7                | 0  | 6   | 0                 | 6                 | 0   | 6512.865               | 6512.876                | -11.1                  |
| 2  | 2                | 0                | 0  | 1   | 1                 | 1                 | 0   | 6543.568               | 6543.564                | 4.0                    |
| 9  | 0                | 9                | 1  | 8   | 1                 | 8                 | 1   | 6661.651               | 6661.656                | -4.8                   |
| 8  | 1                | 8                | 0  | 7   | 0                 | 7                 | 0   | 7139.550               | 7139.554                | -4.1                   |
| 3  | 2                | 2                | 1  | 2   | 1                 | 1                 | 1   | 7221.091               | 7221.098                | -6.9                   |
| 3  | 2                | 2                | 0  | 2   | 1                 | 1                 | 0   | 7223.923               | 7223.914                | 8.8                    |
| 3  | 2                | 1                | 0  | 2   | 1                 | 2                 | 0   | 7476.446               | 7476.452                | -5.1                   |
| 4  | 2                | 3                | 1  | 3   | 1                 | 2                 | 1   | 7943.866               | 7943.866                | 0.2                    |
| 4  | 2                | 3                | 0  | 3   | 1                 | 2                 | 0   | 7946.446               | 7946.435                | 11.0                   |

Table S36: Assigned rotational transitions for the  $^{13}\text{C}_6$  isotopologue of the monomer of xanthene.

| J' | K <sub>a</sub> ' | K <sub>c</sub> ' | v' | J'' | K <sub>a</sub> '' | K <sub>c</sub> '' | v'' | $\nu_{obs}/\text{MHz}$ | $\nu_{calc}/\text{MHz}$ | $\Delta\nu/\text{kHz}$ |
|----|------------------|------------------|----|-----|-------------------|-------------------|-----|------------------------|-------------------------|------------------------|
| 4  | 1                | 3                | 1  | 4   | 0                 | 4                 | 1   | 2037.898               | 2037.897                | 0.7                    |
| 4  | 1                | 3                | 0  | 4   | 0                 | 4                 | 0   | 2039.139               | 2039.148                | -8.4                   |
| 5  | 1                | 4                | 1  | 5   | 0                 | 5                 | 1   | 2279.410               | 2279.408                | 1.3                    |
| 5  | 1                | 4                | 0  | 5   | 0                 | 5                 | 0   | 2280.679               | 2280.694                | -15.1                  |
| 1  | 1                | 1                | 1  | 0   | 0                 | 0                 | 1   | 2408.879               | 2408.889                | -9.6                   |
| 1  | 1                | 1                | 0  | 0   | 0                 | 0                 | 0   | 2409.817               | 2409.819                | -2.2                   |
| 5  | 0                | 5                | 0  | 4   | 1                 | 4                 | 0   | 2901.932               | 2901.927                | 4.8                    |
| 5  | 0                | 5                | 1  | 4   | 1                 | 4                 | 1   | 2904.074               | 2904.086                | -12.2                  |
| 2  | 1                | 2                | 1  | 1   | 0                 | 1                 | 1   | 3171.500               | 3171.507                | -6.7                   |
| 2  | 1                | 2                | 0  | 1   | 0                 | 1                 | 0   | 3172.192               | 3172.192                | 0.0                    |
| 6  | 0                | 6                | 0  | 5   | 1                 | 5                 | 0   | 3855.262               | 3855.266                | -4.1                   |
| 3  | 1                | 3                | 1  | 2   | 0                 | 2                 | 1   | 3895.695               | 3895.692                | 2.8                    |
| 3  | 1                | 3                | 0  | 2   | 0                 | 2                 | 0   | 3896.124               | 3896.128                | -3.3                   |
| 6  | 2                | 4                | 0  | 6   | 1                 | 5                 | 0   | 4216.374               | 4216.365                | 9.1                    |
| 4  | 2                | 2                | 1  | 4   | 1                 | 3                 | 1   | 4473.762               | 4473.765                | -2.6                   |
| 4  | 2                | 2                | 0  | 4   | 1                 | 3                 | 0   | 4477.164               | 4477.170                | -5.4                   |
| 2  | 2                | 0                | 1  | 2   | 1                 | 1                 | 1   | 4704.389               | 4704.387                | 1.5                    |
| 2  | 2                | 0                | 0  | 2   | 1                 | 1                 | 0   | 4707.863               | 4707.866                | -3.6                   |
| 7  | 0                | 7                | 0  | 6   | 1                 | 6                 | 0   | 4803.801               | 4803.795                | 5.6                    |
| 7  | 0                | 7                | 1  | 6   | 1                 | 6                 | 1   | 4806.192               | 4806.184                | 7.8                    |
| 4  | 2                | 3                | 0  | 4   | 1                 | 4                 | 0   | 5224.455               | 5224.451                | 3.7                    |
| 5  | 1                | 5                | 0  | 4   | 0                 | 4                 | 0   | 5245.931               | 5245.931                | -0.1                   |
| 5  | 2                | 4                | 0  | 5   | 1                 | 5                 | 0   | 5427.895               | 5427.876                | 19.0                   |
| 6  | 1                | 6                | 0  | 5   | 0                 | 5                 | 0   | 5885.734               | 5885.732                | 1.8                    |

| J' | K <sub>a</sub> ' | K <sub>c</sub> ' | v' | J'' | K <sub>a</sub> '' | K <sub>c</sub> '' | v'' | $\nu_{obs}/\text{MHz}$ | $\nu_{calc}/\text{MHz}$ | $\Delta\nu/\text{kHz}$ |
|----|------------------|------------------|----|-----|-------------------|-------------------|-----|------------------------|-------------------------|------------------------|
| 7  | 1                | 7                | 0  | 6   | 0                 | 6                 | 0   | 6514.066               | 6514.074                | -8.4                   |
| 9  | 0                | 9                | 0  | 8   | 1                 | 8                 | 0   | 6654.197               | 6654.193                | 3.4                    |
| 8  | 1                | 8                | 0  | 7   | 0                 | 7                 | 0   | 7140.531               | 7140.530                | 1.4                    |
| 3  | 2                | 2                | 1  | 2   | 1                 | 1                 | 1   | 7226.643               | 7226.650                | -7.7                   |
| 3  | 2                | 1                | 0  | 2   | 1                 | 2                 | 0   | 7481.388               | 7481.403                | -14.9                  |
| 4  | 2                | 3                | 1  | 3   | 1                 | 2                 | 1   | 7949.304               | 7949.293                | 11.0                   |
| 4  | 2                | 3                | 0  | 3   | 1                 | 2                 | 0   | 7951.858               | 7951.852                | 6.1                    |

Table S37: Assigned rotational transitions for the  $^{13}\text{C}_7$  isotopologue of the monomer of xanthene.

| J' | K <sub>a</sub> ' | K <sub>c</sub> ' | J'' | K <sub>a</sub> '' | K <sub>c</sub> '' | $\nu_{obs}/\text{MHz}$ | $\nu_{calc}/\text{MHz}$ | $\Delta\nu/\text{kHz}$ |
|----|------------------|------------------|-----|-------------------|-------------------|------------------------|-------------------------|------------------------|
| 4  | 1                | 3                | 4   | 0                 | 4                 | 2031.172               | 2031.19328              | -21.2                  |
| 1  | 1                | 1                | 0   | 0                 | 0                 | 2394.982               | 2394.98495              | -3.0                   |
| 5  | 0                | 5                | 4   | 1                 | 4                 | 2973.562               | 2973.56468              | -2.3                   |
| 2  | 1                | 2                | 1   | 0                 | 1                 | 3163.820               | 3163.82927              | -9.3                   |
| 3  | 1                | 3                | 2   | 0                 | 2                 | 3893.136               | 3893.13651              | -0.9                   |
| 6  | 0                | 6                | 5   | 1                 | 5                 | 3935.502               | 3935.5024               | -0.1                   |
| 4  | 2                | 2                | 4   | 1                 | 3                 | 4401.547               | 4401.5359               | 11.3                   |
| 4  | 1                | 4                | 3   | 0                 | 3                 | 4586.938               | 4586.9495               | -11.5                  |
| 7  | 0                | 7                | 6   | 1                 | 6                 | 4891.020               | 4891.02313              | -2.8                   |
| 3  | 2                | 2                | 3   | 1                 | 3                 | 5002.599               | 5002.59619              | 2.6                    |
| 5  | 1                | 5                | 4   | 0                 | 4                 | 5251.695               | 5251.70087              | -6.3                   |
| 8  | 0                | 8                | 7   | 1                 | 7                 | 5831.344               | 5831.33249              | 11.3                   |
| 6  | 1                | 6                | 5   | 0                 | 5                 | 5895.895               | 5895.90813              | -13.2                  |

| J' | K <sub>a</sub> ' | K <sub>c</sub> ' | J'' | K <sub>a</sub> '' | K <sub>c</sub> '' | $\nu_{obs}/\text{MHz}$ | $\nu_{calc}/\text{MHz}$ | $\Delta\nu/\text{kHz}$ |
|----|------------------|------------------|-----|-------------------|-------------------|------------------------|-------------------------|------------------------|
| 2  | 2                | 0                | 1   | 1                 | 1                 | 6500.740               | 6500.74198              | -2.3                   |
| 7  | 1                | 7                | 6   | 0                 | 6                 | 6529.422               | 6529.43719              | -14.9                  |
| 9  | 0                | 9                | 8   | 1                 | 8                 | 6750.410               | 6750.40524              | 5.2                    |
| 8  | 1                | 8                | 7   | 0                 | 7                 | 7162.315               | 7162.29728              | 17.8                   |
| 3  | 2                | 2                | 2   | 1                 | 1                 | 7184.951               | 7184.94724              | 4.1                    |
| 4  | 2                | 3                | 3   | 1                 | 2                 | 7912.611               | 7912.60326              | 7.7                    |

### 3.2 Frequency lists of the xanthene-H<sub>2</sub>O complexes

Table S38: Assigned rotational transitions for the xanthene-H<sub>2</sub>O complex, 1w-I.

| J' | K <sub>a</sub> ' | K <sub>c</sub> ' | v' | J'' | K <sub>a</sub> '' | K <sub>c</sub> '' | v'' | $\nu_{obs}/\text{MHz}$ | $\nu_{calc}/\text{MHz}$ | $\Delta\nu/\text{kHz}$ |
|----|------------------|------------------|----|-----|-------------------|-------------------|-----|------------------------|-------------------------|------------------------|
| 3  | 2                | 2                | 0  | 3   | 1                 | 3                 | 0   | 2028.491               | 2028.493                | -2.1                   |
| 3  | 2                | 2                | 1  | 3   | 1                 | 3                 | 1   | 2028.491               | 2028.493                | -2.1                   |
| 8  | 3                | 5                | 0  | 8   | 2                 | 6                 | 0   | 2073.021               | 2073.021                | -0.3                   |
| 8  | 3                | 5                | 1  | 8   | 2                 | 6                 | 1   | 2073.021               | 2073.021                | -0.3                   |
| 5  | 3                | 2                | 1  | 5   | 2                 | 3                 | 1   | 2147.219               | 2147.220                | -1.0                   |
| 5  | 3                | 2                | 0  | 5   | 2                 | 3                 | 0   | 2147.219               | 2147.220                | -1.0                   |
| 5  | 1                | 4                | 0  | 5   | 0                 | 5                 | 0   | 2163.093               | 2163.079                | 13.3                   |
| 5  | 1                | 4                | 1  | 5   | 0                 | 5                 | 1   | 2163.093               | 2163.079                | 13.3                   |
| 4  | 1                | 3                | 0  | 3   | 2                 | 2                 | 0   | 2200.631               | 2200.630                | 1.1                    |
| 4  | 1                | 3                | 1  | 3   | 2                 | 2                 | 1   | 2200.631               | 2200.630                | 1.1                    |
| 7  | 2                | 5                | 0  | 7   | 1                 | 6                 | 0   | 2272.159               | 2272.149                | 9.4                    |
| 7  | 2                | 5                | 1  | 7   | 1                 | 6                 | 1   | 2272.159               | 2272.149                | 9.4                    |
| 2  | 1                | 1                | 0  | 1   | 0                 | 1                 | 1   | 2307.626               | 2307.619                | 7.4                    |



| J' | K <sub>a</sub> ' | K <sub>c</sub> ' | v' | J'' | K <sub>a</sub> '' | K <sub>c</sub> '' | v'' | $\nu_{obs}/\text{MHz}$ | $\nu_{calc}/\text{MHz}$ | $\Delta\nu/\text{kHz}$ |
|----|------------------|------------------|----|-----|-------------------|-------------------|-----|------------------------|-------------------------|------------------------|
| 2  | 1                | 1                | 1  | 1   | 0                 | 1                 | 0   | 2307.676               | 2307.678                | -1.9                   |
| 4  | 3                | 1                | 1  | 4   | 2                 | 2                 | 1   | 2337.382               | 2337.385                | -3.1                   |
| 4  | 3                | 1                | 0  | 4   | 2                 | 2                 | 0   | 2337.382               | 2337.385                | -3.1                   |
| 4  | 2                | 3                | 0  | 4   | 1                 | 4                 | 0   | 2350.869               | 2350.865                | 3.5                    |
| 4  | 2                | 3                | 1  | 4   | 1                 | 4                 | 1   | 2350.869               | 2350.865                | 3.5                    |
| 3  | 1                | 3                | 1  | 2   | 0                 | 2                 | 1   | 2438.000               | 2438.002                | -1.8                   |
| 3  | 1                | 3                | 0  | 2   | 0                 | 2                 | 0   | 2438.000               | 2438.002                | -1.8                   |
| 3  | 3                | 0                | 1  | 3   | 2                 | 1                 | 1   | 2488.467               | 2488.466                | 1.4                    |
| 3  | 3                | 0                | 0  | 3   | 2                 | 1                 | 0   | 2488.467               | 2488.466                | 1.4                    |
| 8  | 3                | 6                | 1  | 7   | 4                 | 3                 | 1   | 2540.361               | 2540.367                | -5.8                   |
| 8  | 3                | 6                | 1  | 7   | 4                 | 3                 | 1   | 2540.361               | 2540.367                | -5.8                   |
| 7  | 3                | 4                | 1  | 6   | 4                 | 3                 | 1   | 2543.156               | 2543.156                | 0.3                    |
| 7  | 3                | 4                | 0  | 6   | 4                 | 3                 | 0   | 2543.156               | 2543.156                | 0.3                    |
| 10 | 4                | 6                | 1  | 10  | 3                 | 7                 | 1   | 2562.064               | 2562.067                | -2.7                   |
| 10 | 4                | 6                | 0  | 10  | 3                 | 7                 | 0   | 2562.064               | 2562.067                | -2.7                   |
| 3  | 3                | 1                | 0  | 3   | 2                 | 2                 | 0   | 2630.622               | 2630.619                | 3.3                    |
| 3  | 3                | 1                | 1  | 3   | 2                 | 2                 | 1   | 2630.622               | 2630.619                | 3.3                    |
| 9  | 4                | 6                | 0  | 8   | 5                 | 3                 | 0   | 2641.483               | 2641.487                | -4.3                   |
| 9  | 4                | 6                | 1  | 8   | 5                 | 3                 | 1   | 2641.483               | 2641.487                | -4.3                   |
| 9  | 4                | 5                | 1  | 9   | 3                 | 6                 | 1   | 2649.559               | 2649.564                | -5.0                   |
| 9  | 4                | 5                | 0  | 9   | 3                 | 6                 | 0   | 2649.559               | 2649.564                | -5.0                   |
| 4  | 0                | 4                | 1  | 3   | 1                 | 3                 | 1   | 2667.766               | 2667.767                | -1.1                   |
| 4  | 0                | 4                | 0  | 3   | 1                 | 3                 | 0   | 2667.766               | 2667.767                | -1.1                   |
| 11 | 4                | 7                | 1  | 11  | 3                 | 8                 | 1   | 2672.066               | 2672.074                | -7.8                   |
| 11 | 4                | 7                | 0  | 11  | 3                 | 8                 | 0   | 2672.066               | 2672.074                | -7.8                   |
| 4  | 3                | 2                | 0  | 4   | 2                 | 3                 | 0   | 2706.095               | 2706.095                | 0.1                    |

| J' | K <sub>a</sub> ' | K <sub>c</sub> ' | v' | J'' | K <sub>a</sub> '' | K <sub>c</sub> '' | v'' | $\nu_{obs}/\text{MHz}$ | $\nu_{calc}/\text{MHz}$ | $\Delta\nu/\text{kHz}$ |
|----|------------------|------------------|----|-----|-------------------|-------------------|-----|------------------------|-------------------------|------------------------|
| 4  | 3                | 2                | 1  | 4   | 2                 | 3                 | 1   | 2706.095               | 2706.095                | 0.1                    |
| 4  | 3                | 1                | 0  | 4   | 2                 | 3                 | 1   | 2734.263               | 2734.263                | 0.5                    |
| 4  | 3                | 1                | 1  | 4   | 2                 | 3                 | 0   | 2734.309               | 2734.310                | -1.4                   |
| 5  | 2                | 4                | 1  | 5   | 1                 | 5                 | 1   | 2751.364               | 2751.355                | 9.6                    |
| 5  | 2                | 4                | 0  | 5   | 1                 | 5                 | 0   | 2751.364               | 2751.355                | 9.6                    |
| 5  | 1                | 4                | 0  | 4   | 2                 | 2                 | 1   | 2800.693               | 2800.692                | 0.6                    |
| 5  | 1                | 4                | 1  | 4   | 2                 | 2                 | 0   | 2800.748               | 2800.744                | 3.5                    |
| 6  | 1                | 5                | 0  | 6   | 0                 | 6                 | 0   | 2834.525               | 2834.508                | 17.5                   |
| 6  | 1                | 5                | 1  | 6   | 0                 | 6                 | 1   | 2834.525               | 2834.508                | 17.5                   |
| 5  | 3                | 3                | 1  | 5   | 2                 | 4                 | 1   | 2844.438               | 2844.437                | 1.4                    |
| 5  | 3                | 3                | 0  | 5   | 2                 | 4                 | 0   | 2844.438               | 2844.437                | 1.4                    |
| 8  | 4                | 4                | 1  | 8   | 3                 | 5                 | 1   | 2869.310               | 2869.310                | -0.3                   |
| 8  | 4                | 4                | 0  | 8   | 3                 | 5                 | 0   | 2869.310               | 2869.310                | -0.3                   |
| 8  | 2                | 6                | 0  | 8   | 1                 | 7                 | 0   | 2919.575               | 2919.561                | 13.9                   |
| 8  | 2                | 6                | 1  | 8   | 1                 | 7                 | 1   | 2919.575               | 2919.561                | 13.9                   |
| 10 | 3                | 7                | 1  | 10  | 2                 | 8                 | 1   | 2938.661               | 2938.662                | -0.9                   |
| 10 | 3                | 7                | 0  | 10  | 2                 | 8                 | 0   | 2938.661               | 2938.662                | -0.9                   |
| 5  | 3                | 2                | 0  | 5   | 2                 | 4                 | 1   | 2951.261               | 2951.262                | -0.9                   |
| 5  | 3                | 2                | 1  | 5   | 2                 | 4                 | 0   | 2951.318               | 2951.308                | 9.2                    |
| 4  | 1                | 4                | 1  | 3   | 0                 | 3                 | 1   | 2988.552               | 2988.550                | 1.8                    |
| 4  | 1                | 4                | 0  | 3   | 0                 | 3                 | 0   | 2988.552               | 2988.550                | 1.8                    |
| 9  | 3                | 7                | 0  | 8   | 4                 | 4                 | 0   | 3026.425               | 3026.424                | 2.0                    |
| 9  | 3                | 7                | 1  | 8   | 4                 | 4                 | 1   | 3026.425               | 3026.424                | 2.0                    |
| 2  | 2                | 1                | 0  | 1   | 1                 | 0                 | 0   | 3057.459               | 3057.459                | 0.9                    |
| 2  | 2                | 1                | 1  | 1   | 1                 | 0                 | 1   | 3057.459               | 3057.459                | 0.9                    |
| 6  | 3                | 4                | 1  | 6   | 2                 | 5                 | 1   | 3059.601               | 3059.598                | 3.3                    |

| J' | K <sub>a</sub> ' | K <sub>c</sub> ' | v' | J'' | K <sub>a</sub> '' | K <sub>c</sub> '' | v'' | $\nu_{obs}/\text{MHz}$ | $\nu_{calc}/\text{MHz}$ | $\Delta\nu/\text{kHz}$ |
|----|------------------|------------------|----|-----|-------------------|-------------------|-----|------------------------|-------------------------|------------------------|
| 6  | 3                | 4                | 0  | 6   | 2                 | 5                 | 0   | 3059.601               | 3059.598                | 3.3                    |
| 6  | 2                | 4                | 0  | 5   | 3                 | 3                 | 0   | 3071.804               | 3071.801                | 3.9                    |
| 6  | 2                | 4                | 1  | 5   | 3                 | 3                 | 1   | 3071.804               | 3071.801                | 3.9                    |
| 2  | 2                | 0                | 0  | 1   | 1                 | 0                 | 1   | 3088.278               | 3088.280                | -2.2                   |
| 2  | 2                | 0                | 1  | 1   | 1                 | 0                 | 0   | 3088.338               | 3088.336                | 2.1                    |
| 7  | 4                | 3                | 1  | 7   | 3                 | 4                 | 1   | 3133.126               | 3133.129                | -2.9                   |
| 7  | 4                | 3                | 0  | 7   | 3                 | 4                 | 0   | 3133.126               | 3133.129                | -2.9                   |
| 5  | 1                | 4                | 0  | 4   | 2                 | 3                 | 0   | 3197.618               | 3197.620                | -2.0                   |
| 5  | 1                | 4                | 1  | 4   | 2                 | 3                 | 1   | 3197.618               | 3197.620                | -2.0                   |
| 2  | 2                | 1                | 0  | 1   | 1                 | 1                 | 1   | 3205.114               | 3205.125                | -11.2                  |
| 2  | 2                | 1                | 1  | 1   | 1                 | 1                 | 0   | 3205.173               | 3205.180                | -6.9                   |
| 6  | 2                | 5                | 1  | 6   | 1                 | 6                 | 1   | 3218.616               | 3218.607                | 9.8                    |
| 6  | 2                | 5                | 0  | 6   | 1                 | 6                 | 0   | 3218.616               | 3218.607                | 9.8                    |
| 2  | 2                | 0                | 1  | 1   | 1                 | 1                 | 1   | 3236.002               | 3236.002                | 0.1                    |
| 2  | 2                | 0                | 0  | 1   | 1                 | 1                 | 0   | 3236.002               | 3236.002                | 0.1                    |
| 12 | 5                | 7                | 1  | 12  | 4                 | 8                 | 1   | 3284.183               | 3284.177                | 5.4                    |
| 12 | 5                | 7                | 0  | 12  | 4                 | 8                 | 0   | 3284.183               | 3284.177                | 5.4                    |
| 10 | 3                | 8                | 0  | 9   | 4                 | 5                 | 0   | 3286.093               | 3286.094                | -1.5                   |
| 10 | 3                | 8                | 1  | 9   | 4                 | 5                 | 1   | 3286.093               | 3286.094                | -1.5                   |
| 3  | 1                | 2                | 0  | 2   | 0                 | 2                 | 1   | 3320.007               | 3320.003                | 3.7                    |
| 3  | 1                | 2                | 1  | 2   | 0                 | 2                 | 0   | 3320.065               | 3320.061                | 3.6                    |
| 6  | 1                | 5                | 0  | 5   | 2                 | 3                 | 1   | 3342.979               | 3342.988                | -9.2                   |
| 6  | 1                | 5                | 1  | 5   | 2                 | 3                 | 0   | 3343.041               | 3343.039                | 2.5                    |
| 7  | 3                | 5                | 0  | 7   | 2                 | 6                 | 0   | 3358.151               | 3358.153                | -2.0                   |
| 7  | 3                | 5                | 1  | 7   | 2                 | 6                 | 1   | 3358.151               | 3358.153                | -2.0                   |
| 6  | 4                | 2                | 0  | 6   | 3                 | 3                 | 0   | 3359.897               | 3359.902                | -5.1                   |

| J' | K <sub>a</sub> ' | K <sub>c</sub> ' | v' | J'' | K <sub>a</sub> '' | K <sub>c</sub> '' | v'' | $\nu_{obs}/\text{MHz}$ | $\nu_{calc}/\text{MHz}$ | $\Delta\nu/\text{kHz}$ |
|----|------------------|------------------|----|-----|-------------------|-------------------|-----|------------------------|-------------------------|------------------------|
| 6  | 4                | 2                | 1  | 6   | 3                 | 3                 | 1   | 3359.897               | 3359.902                | -5.1                   |
| 5  | 0                | 5                | 1  | 4   | 1                 | 4                 | 1   | 3385.399               | 3385.406                | -6.8                   |
| 5  | 0                | 5                | 0  | 4   | 1                 | 4                 | 0   | 3385.399               | 3385.406                | -6.8                   |
| 10 | 4                | 7                | 1  | 9   | 5                 | 4                 | 1   | 3397.835               | 3397.836                | -1.7                   |
| 10 | 4                | 7                | 0  | 9   | 5                 | 4                 | 0   | 3397.835               | 3397.836                | -1.7                   |
| 5  | 4                | 1                | 1  | 5   | 3                 | 2                 | 1   | 3508.922               | 3508.932                | -10.5                  |
| 5  | 4                | 1                | 0  | 5   | 3                 | 2                 | 0   | 3508.922               | 3508.932                | -10.5                  |
| 7  | 1                | 6                | 0  | 7   | 0                 | 7                 | 0   | 3515.462               | 3515.451                | 11.1                   |
| 7  | 1                | 6                | 1  | 7   | 0                 | 7                 | 1   | 3515.462               | 3515.451                | 11.1                   |
| 5  | 1                | 5                | 1  | 4   | 0                 | 4                 | 1   | 3552.569               | 3552.573                | -4.1                   |
| 5  | 1                | 5                | 0  | 4   | 0                 | 4                 | 0   | 3552.569               | 3552.573                | -4.1                   |
| 11 | 5                | 6                | 0  | 11  | 4                 | 7                 | 0   | 3560.245               | 3560.240                | 5.0                    |
| 11 | 5                | 6                | 1  | 11  | 4                 | 7                 | 1   | 3560.245               | 3560.240                | 5.0                    |
| 4  | 4                | 0                | 1  | 4   | 3                 | 1                 | 1   | 3585.841               | 3585.840                | 0.9                    |
| 4  | 4                | 0                | 0  | 4   | 3                 | 1                 | 0   | 3585.841               | 3585.840                | 0.9                    |
| 5  | 4                | 2                | 0  | 5   | 3                 | 3                 | 0   | 3611.731               | 3611.733                | -1.9                   |
| 5  | 4                | 2                | 0  | 5   | 3                 | 3                 | 0   | 3611.731               | 3611.733                | -1.9                   |
| 4  | 4                | 1                | 1  | 4   | 3                 | 2                 | 1   | 3613.576               | 3613.574                | 2.0                    |
| 4  | 4                | 1                | 0  | 4   | 3                 | 2                 | 0   | 3613.576               | 3613.574                | 2.0                    |
| 11 | 3                | 8                | 1  | 11  | 2                 | 9                 | 1   | 3631.023               | 3631.032                | -8.9                   |
| 11 | 3                | 8                | 0  | 11  | 2                 | 9                 | 0   | 3631.023               | 3631.032                | -8.9                   |
| 6  | 4                | 3                | 0  | 6   | 3                 | 4                 | 0   | 3631.397               | 3631.395                | 2.5                    |
| 6  | 4                | 3                | 1  | 6   | 3                 | 4                 | 1   | 3631.397               | 3631.395                | 2.5                    |
| 9  | 2                | 7                | 1  | 9   | 1                 | 8                 | 1   | 3641.487               | 3641.487                | -0.7                   |
| 9  | 2                | 7                | 0  | 9   | 1                 | 8                 | 0   | 3641.487               | 3641.487                | -0.7                   |
| 3  | 2                | 2                | 1  | 2   | 1                 | 1                 | 1   | 3691.506               | 3691.506                | 0.4                    |

| J' | K <sub>a</sub> ' | K <sub>c</sub> ' | v' | J'' | K <sub>a</sub> '' | K <sub>c</sub> '' | v'' | $\nu_{obs}/\text{MHz}$ | $\nu_{calc}/\text{MHz}$ | $\Delta\nu/\text{kHz}$ |
|----|------------------|------------------|----|-----|-------------------|-------------------|-----|------------------------|-------------------------|------------------------|
| 3  | 2                | 2                | 0  | 2   | 1                 | 1                 | 0   | 3691.506               | 3691.506                | 0.4                    |
| 7  | 4                | 4                | 0  | 7   | 3                 | 5                 | 0   | 3692.293               | 3692.291                | 2.1                    |
| 7  | 4                | 4                | 1  | 7   | 3                 | 5                 | 1   | 3692.293               | 3692.291                | 2.1                    |
| 7  | 2                | 6                | 0  | 7   | 1                 | 7                 | 0   | 3737.115               | 3737.104                | 10.6                   |
| 7  | 2                | 6                | 1  | 7   | 1                 | 7                 | 1   | 3737.115               | 3737.104                | 10.6                   |
| 8  | 3                | 6                | 0  | 8   | 2                 | 7                 | 0   | 3738.216               | 3738.209                | 6.6                    |
| 8  | 3                | 6                | 1  | 8   | 2                 | 7                 | 1   | 3738.216               | 3738.209                | 6.6                    |
| 8  | 3                | 5                | 1  | 7   | 4                 | 4                 | 1   | 3742.985               | 3742.985                | 0.3                    |
| 8  | 3                | 5                | 0  | 7   | 4                 | 4                 | 0   | 3742.985               | 3742.985                | 0.3                    |
| 8  | 4                | 5                | 0  | 8   | 3                 | 6                 | 0   | 3814.367               | 3814.358                | 8.2                    |
| 8  | 4                | 5                | 1  | 8   | 3                 | 6                 | 1   | 3814.367               | 3814.358                | 8.2                    |
| 3  | 2                | 1                | 0  | 2   | 1                 | 1                 | 1   | 3837.768               | 3837.767                | 1.5                    |
| 3  | 2                | 1                | 1  | 2   | 1                 | 1                 | 0   | 3837.827               | 3837.821                | 5.5                    |
| 10 | 5                | 5                | 1  | 10  | 4                 | 6                 | 1   | 3890.315               | 3890.312                | 2.4                    |
| 10 | 5                | 5                | 0  | 10  | 4                 | 6                 | 0   | 3890.315               | 3890.312                | 2.4                    |
| 15 | 6                | 9                | 0  | 15  | 5                 | 10                | 0   | 3900.883               | 3900.866                | 16.3                   |
| 15 | 6                | 9                | 1  | 15  | 5                 | 10                | 1   | 3900.883               | 3900.866                | 16.3                   |
| 7  | 3                | 4                | 0  | 7   | 2                 | 6                 | 1   | 3985.721               | 3985.718                | 2.4                    |
| 7  | 3                | 4                | 1  | 7   | 2                 | 6                 | 0   | 3985.772               | 3985.762                | 10.2                   |
| 9  | 4                | 6                | 0  | 9   | 3                 | 7                 | 0   | 4013.282               | 4013.282                | 0.1                    |
| 9  | 4                | 6                | 1  | 9   | 3                 | 7                 | 1   | 4013.282               | 4013.282                | 0.1                    |
| 6  | 0                | 6                | 1  | 5   | 1                 | 5                 | 1   | 4063.925               | 4063.926                | -1.2                   |
| 6  | 0                | 6                | 0  | 5   | 1                 | 5                 | 0   | 4063.925               | 4063.926                | -1.2                   |
| 3  | 2                | 2                | 0  | 2   | 1                 | 2                 | 1   | 4134.557               | 4134.561                | -4.4                   |
| 3  | 2                | 2                | 1  | 2   | 1                 | 2                 | 0   | 4134.614               | 4134.616                | -1.4                   |
| 6  | 1                | 6                | 0  | 5   | 0                 | 5                 | 0   | 4143.040               | 4143.043                | -3.4                   |

| J' | K <sub>a</sub> ' | K <sub>c</sub> ' | v' | J'' | K <sub>a</sub> '' | K <sub>c</sub> '' | v'' | $\nu_{obs}/\text{MHz}$ | $\nu_{calc}/\text{MHz}$ | $\Delta\nu/\text{kHz}$ |
|----|------------------|------------------|----|-----|-------------------|-------------------|-----|------------------------|-------------------------|------------------------|
| 6  | 1                | 6                | 1  | 5   | 0                 | 5                 | 1   | 4143.040               | 4143.043                | -3.4                   |
| 6  | 1                | 5                | 1  | 5   | 2                 | 4                 | 1   | 4147.084               | 4147.079                | 5.0                    |
| 6  | 1                | 5                | 0  | 5   | 2                 | 4                 | 0   | 4147.084               | 4147.079                | 5.0                    |
| 8  | 1                | 7                | 0  | 8   | 0                 | 8                 | 0   | 4174.920               | 4174.911                | 8.7                    |
| 8  | 1                | 7                | 1  | 8   | 0                 | 8                 | 1   | 4174.920               | 4174.911                | 8.7                    |
| 9  | 5                | 4                | 1  | 9   | 4                 | 5                 | 1   | 4185.523               | 4185.526                | -3.2                   |
| 9  | 5                | 4                | 0  | 9   | 4                 | 5                 | 0   | 4185.523               | 4185.526                | -3.2                   |
| 9  | 3                | 7                | 0  | 9   | 2                 | 8                 | 0   | 4190.101               | 4190.099                | 2.6                    |
| 9  | 3                | 7                | 1  | 9   | 2                 | 8                 | 1   | 4190.101               | 4190.099                | 2.6                    |
| 7  | 2                | 5                | 1  | 6   | 3                 | 4                 | 1   | 4228.800               | 4228.790                | 10.3                   |
| 7  | 2                | 5                | 0  | 6   | 3                 | 4                 | 0   | 4228.800               | 4228.790                | 10.3                   |
| 4  | 2                | 3                | 1  | 3   | 1                 | 2                 | 1   | 4249.203               | 4249.208                | -5.2                   |
| 4  | 2                | 3                | 0  | 3   | 1                 | 2                 | 0   | 4249.203               | 4249.208                | -5.2                   |
| 3  | 2                | 1                | 1  | 2   | 1                 | 2                 | 1   | 4280.880               | 4280.876                | 3.9                    |
| 3  | 2                | 1                | 0  | 2   | 1                 | 2                 | 0   | 4280.880               | 4280.876                | 3.9                    |
| 8  | 2                | 7                | 0  | 8   | 1                 | 8                 | 0   | 4290.750               | 4290.738                | 12.3                   |
| 8  | 2                | 7                | 1  | 8   | 1                 | 8                 | 1   | 4290.750               | 4290.738                | 12.3                   |
| 10 | 4                | 7                | 1  | 10  | 3                 | 8                 | 1   | 4297.270               | 4297.269                | 1.0                    |
| 10 | 4                | 7                | 0  | 10  | 3                 | 8                 | 0   | 4297.270               | 4297.269                | 1.0                    |
| 10 | 2                | 8                | 0  | 10  | 1                 | 9                 | 0   | 4369.901               | 4369.900                | 1.7                    |
| 10 | 2                | 8                | 1  | 10  | 1                 | 9                 | 1   | 4369.901               | 4369.900                | 1.7                    |
| 8  | 5                | 3                | 0  | 8   | 4                 | 4                 | 0   | 4398.210               | 4398.218                | -8.0                   |
| 8  | 5                | 3                | 1  | 8   | 4                 | 4                 | 1   | 4398.210               | 4398.218                | -8.0                   |
| 4  | 1                | 3                | 0  | 3   | 0                 | 3                 | 1   | 4437.277               | 4437.272                | 4.8                    |
| 4  | 1                | 3                | 1  | 3   | 0                 | 3                 | 0   | 4437.332               | 4437.329                | 3.4                    |
| 8  | 5                | 4                | 0  | 8   | 4                 | 5                 | 0   | 4575.144               | 4575.144                | -0.2                   |

| J' | K <sub>a</sub> ' | K <sub>c</sub> ' | v' | J'' | K <sub>a</sub> '' | K <sub>c</sub> '' | v'' | $\nu_{obs}/\text{MHz}$ | $\nu_{calc}/\text{MHz}$ | $\Delta\nu/\text{kHz}$ |
|----|------------------|------------------|----|-----|-------------------|-------------------|-----|------------------------|-------------------------|------------------------|
| 8  | 5                | 4                | 1  | 8   | 4                 | 5                 | 1   | 4575.144               | 4575.144                | -0.2                   |
| 9  | 5                | 5                | 0  | 9   | 4                 | 6                 | 0   | 4578.677               | 4578.677                | 0.3                    |
| 9  | 5                | 5                | 1  | 9   | 4                 | 6                 | 1   | 4578.677               | 4578.677                | 0.3                    |
| 7  | 5                | 3                | 0  | 7   | 4                 | 4                 | 0   | 4593.699               | 4593.702                | -2.9                   |
| 7  | 5                | 3                | 1  | 7   | 4                 | 4                 | 1   | 4593.699               | 4593.702                | -2.9                   |
| 6  | 5                | 2                | 0  | 6   | 4                 | 2                 | 1   | 4598.945               | 4598.952                | -6.6                   |
| 6  | 5                | 2                | 1  | 6   | 4                 | 2                 | 0   | 4598.993               | 4598.999                | -5.6                   |
| 6  | 5                | 2                | 1  | 6   | 4                 | 2                 | 0   | 4598.993               | 4598.999                | -5.6                   |
| 6  | 5                | 1                | 0  | 6   | 4                 | 2                 | 0   | 4599.469               | 4599.472                | -2.4                   |
| 6  | 5                | 1                | 1  | 6   | 4                 | 2                 | 1   | 4599.469               | 4599.472                | -2.4                   |
| 6  | 5                | 2                | 0  | 6   | 4                 | 3                 | 0   | 4618.612               | 4618.612                | 0.5                    |
| 6  | 5                | 2                | 1  | 6   | 4                 | 3                 | 1   | 4618.612               | 4618.612                | 0.5                    |
| 10 | 5                | 6                | 0  | 10  | 4                 | 7                 | 0   | 4624.220               | 4624.220                | 0.3                    |
| 10 | 5                | 6                | 1  | 10  | 4                 | 7                 | 1   | 4624.220               | 4624.220                | 0.3                    |
| 5  | 5                | 0                | 0  | 5   | 4                 | 1                 | 0   | 4636.322               | 4636.329                | -6.7                   |
| 5  | 5                | 0                | 1  | 5   | 4                 | 1                 | 1   | 4636.322               | 4636.329                | -6.7                   |
| 5  | 5                | 1                | 0  | 5   | 4                 | 2                 | 0   | 4640.327               | 4640.332                | -4.9                   |
| 5  | 5                | 1                | 1  | 5   | 4                 | 2                 | 1   | 4640.327               | 4640.332                | -4.9                   |
| 4  | 2                | 2                | 0  | 3   | 1                 | 2                 | 1   | 4646.084               | 4646.083                | 0.8                    |
| 4  | 2                | 2                | 1  | 3   | 1                 | 2                 | 0   | 4646.139               | 4646.136                | 2.7                    |
| 11 | 4                | 8                | 1  | 11  | 3                 | 9                 | 1   | 4665.668               | 4665.677                | -9.4                   |
| 11 | 4                | 8                | 0  | 11  | 3                 | 9                 | 0   | 4665.668               | 4665.677                | -9.4                   |
| 10 | 3                | 8                | 0  | 10  | 2                 | 9                 | 0   | 4698.941               | 4698.940                | 0.9                    |
| 10 | 3                | 8                | 1  | 10  | 2                 | 9                 | 1   | 4698.941               | 4698.940                | 0.9                    |
| 7  | 0                | 7                | 1  | 6   | 1                 | 6                 | 1   | 4719.381               | 4719.394                | -13.0                  |
| 7  | 0                | 7                | 0  | 6   | 1                 | 6                 | 0   | 4719.381               | 4719.394                | -13.0                  |

| J' | K <sub>a</sub> ' | K <sub>c</sub> ' | v' | J'' | K <sub>a</sub> '' | K <sub>c</sub> '' | v'' | $\nu_{obs}/\text{MHz}$ | $\nu_{calc}/\text{MHz}$ | $\Delta\nu/\text{kHz}$ |
|----|------------------|------------------|----|-----|-------------------|-------------------|-----|------------------------|-------------------------|------------------------|
| 11 | 5                | 7                | 0  | 11  | 4                 | 8                 | 0   | 4732.002               | 4731.998                | 4.1                    |
| 11 | 5                | 7                | 1  | 11  | 4                 | 8                 | 1   | 4732.002               | 4731.998                | 4.1                    |
| 5  | 2                | 4                | 1  | 4   | 1                 | 3                 | 1   | 4742.568               | 4742.572                | -3.8                   |
| 5  | 2                | 4                | 0  | 4   | 1                 | 3                 | 0   | 4742.568               | 4742.572                | -3.8                   |
| 7  | 1                | 7                | 1  | 6   | 0                 | 6                 | 1   | 4754.466               | 4754.467                | -0.6                   |
| 7  | 1                | 7                | 0  | 6   | 0                 | 6                 | 0   | 4754.466               | 4754.467                | -0.6                   |
| 9  | 1                | 8                | 0  | 9   | 0                 | 9                 | 0   | 4809.594               | 4809.585                | 9.5                    |
| 9  | 1                | 8                | 1  | 9   | 0                 | 9                 | 1   | 4809.594               | 4809.585                | 9.5                    |
| 3  | 3                | 1                | 1  | 2   | 2                 | 0                 | 1   | 4945.020               | 4945.018                | 2.3                    |
| 3  | 3                | 1                | 0  | 2   | 2                 | 0                 | 0   | 4945.020               | 4945.018                | 2.3                    |
| 3  | 3                | 0                | 0  | 2   | 2                 | 0                 | 1   | 4949.130               | 4949.128                | 2.1                    |
| 3  | 3                | 0                | 1  | 2   | 2                 | 0                 | 0   | 4949.174               | 4949.176                | -1.9                   |
| 3  | 3                | 1                | 0  | 2   | 2                 | 1                 | 1   | 4975.838               | 4975.843                | -4.9                   |
| 3  | 3                | 1                | 1  | 2   | 2                 | 1                 | 0   | 4975.896               | 4975.891                | 4.7                    |
| 12 | 6                | 6                | 0  | 12  | 5                 | 7                 | 0   | 4977.617               | 4977.603                | 14.7                   |
| 12 | 6                | 6                | 1  | 12  | 5                 | 7                 | 1   | 4977.617               | 4977.603                | 14.7                   |
| 3  | 3                | 0                | 1  | 2   | 2                 | 1                 | 1   | 4980.004               | 4980.002                | 1.9                    |
| 3  | 3                | 0                | 0  | 2   | 2                 | 1                 | 0   | 4980.004               | 4980.002                | 1.9                    |
| 9  | 3                | 6                | 0  | 8   | 4                 | 5                 | 0   | 5013.186               | 5013.187                | -0.8                   |
| 9  | 3                | 6                | 1  | 8   | 4                 | 5                 | 1   | 5013.186               | 5013.187                | -0.8                   |
| 7  | 1                | 6                | 0  | 6   | 2                 | 5                 | 0   | 5016.238               | 5016.239                | -0.7                   |
| 7  | 1                | 6                | 1  | 6   | 2                 | 5                 | 1   | 5016.238               | 5016.239                | -0.7                   |
| 12 | 4                | 9                | 1  | 12  | 3                 | 10                | 1   | 5109.647               | 5109.661                | -14.0                  |
| 12 | 4                | 9                | 0  | 12  | 3                 | 10                | 0   | 5109.647               | 5109.661                | -14.0                  |
| 4  | 2                | 3                | 0  | 3   | 1                 | 3                 | 1   | 5131.213               | 5131.212                | 1.3                    |
| 4  | 2                | 3                | 1  | 3   | 1                 | 3                 | 0   | 5131.264               | 5131.265                | -0.6                   |



| J' | K <sub>a</sub> ' | K <sub>c</sub> ' | v' | J'' | K <sub>a</sub> '' | K <sub>c</sub> '' | v'' | $\nu_{obs}/\text{MHz}$ | $\nu_{calc}/\text{MHz}$ | $\Delta\nu/\text{kHz}$ |
|----|------------------|------------------|----|-----|-------------------|-------------------|-----|------------------------|-------------------------|------------------------|
| 4  | 3                | 1                | 1  | 4   | 0                 | 4                 | 1   | 5197.761               | 5197.758                | 3.4                    |
| 4  | 3                | 1                | 0  | 4   | 0                 | 4                 | 0   | 5197.761               | 5197.758                | 3.4                    |
| 6  | 2                | 5                | 1  | 5   | 1                 | 4                 | 1   | 5198.564               | 5198.571                | -6.4                   |
| 6  | 2                | 5                | 0  | 5   | 1                 | 4                 | 0   | 5198.564               | 5198.571                | -6.4                   |
| 11 | 3                | 9                | 0  | 11  | 2                 | 10                | 0   | 5248.256               | 5248.273                | -16.7                  |
| 11 | 3                | 9                | 1  | 11  | 2                 | 10                | 1   | 5248.256               | 5248.273                | -16.7                  |
| 11 | 6                | 5                | 0  | 11  | 5                 | 6                 | 0   | 5248.992               | 5248.998                | -5.9                   |
| 11 | 6                | 5                | 1  | 11  | 5                 | 6                 | 1   | 5248.992               | 5248.998                | -5.9                   |
| 8  | 2                | 6                | 0  | 7   | 3                 | 5                 | 0   | 5362.253               | 5362.254                | -1.0                   |
| 8  | 2                | 6                | 1  | 7   | 3                 | 5                 | 1   | 5362.253               | 5362.254                | -1.0                   |
| 8  | 0                | 8                | 1  | 7   | 1                 | 7                 | 1   | 5363.038               | 5363.040                | -2.2                   |
| 8  | 0                | 8                | 0  | 7   | 1                 | 7                 | 0   | 5363.038               | 5363.040                | -2.2                   |
| 8  | 1                | 8                | 1  | 7   | 0                 | 7                 | 1   | 5377.903               | 5377.905                | -2.3                   |
| 8  | 1                | 8                | 0  | 7   | 0                 | 7                 | 0   | 5377.903               | 5377.905                | -2.3                   |
| 10 | 1                | 9                | 0  | 10  | 0                 | 10                | 0   | 5426.853               | 5426.839                | 14.0                   |
| 10 | 1                | 9                | 1  | 10  | 0                 | 10                | 1   | 5426.853               | 5426.839                | 14.0                   |
| 10 | 6                | 4                | 0  | 10  | 5                 | 5                 | 0   | 5429.328               | 5429.330                | -2.8                   |
| 10 | 6                | 4                | 1  | 10  | 5                 | 5                 | 1   | 5429.328               | 5429.330                | -2.8                   |
| 10 | 2                | 9                | 0  | 10  | 1                 | 10                | 0   | 5452.831               | 5452.824                | 7.1                    |
| 10 | 2                | 9                | 1  | 10  | 1                 | 10                | 1   | 5452.831               | 5452.824                | 7.1                    |
| 12 | 6                | 7                | 0  | 12  | 5                 | 8                 | 0   | 5486.840               | 5486.844                | -4.1                   |
| 12 | 6                | 7                | 1  | 12  | 5                 | 8                 | 1   | 5486.840               | 5486.844                | -4.1                   |
| 11 | 6                | 6                | 0  | 11  | 5                 | 7                 | 0   | 5499.624               | 5499.633                | -9.2                   |
| 11 | 6                | 6                | 1  | 11  | 5                 | 7                 | 1   | 5499.624               | 5499.633                | -9.2                   |
| 13 | 6                | 8                | 1  | 13  | 5                 | 9                 | 1   | 5517.784               | 5517.778                | 6.2                    |
| 13 | 6                | 8                | 0  | 13  | 5                 | 9                 | 0   | 5517.784               | 5517.778                | 6.2                    |

| J' | K <sub>a</sub> ' | K <sub>c</sub> ' | v' | J'' | K <sub>a</sub> '' | K <sub>c</sub> '' | v'' | $\nu_{obs}/\text{MHz}$ | $\nu_{calc}/\text{MHz}$ | $\Delta\nu/\text{kHz}$ |
|----|------------------|------------------|----|-----|-------------------|-------------------|-----|------------------------|-------------------------|------------------------|
| 4  | 2                | 2                | 1  | 3   | 1                 | 3                 | 1   | 5528.149               | 5528.140                | 9.1                    |
| 4  | 2                | 2                | 0  | 3   | 1                 | 3                 | 0   | 5528.149               | 5528.140                | 9.1                    |
| 10 | 6                | 5                | 0  | 10  | 5                 | 6                 | 0   | 5536.018               | 5536.015                | 2.8                    |
| 10 | 6                | 5                | 1  | 10  | 5                 | 6                 | 1   | 5536.018               | 5536.015                | 2.8                    |
| 9  | 6                | 3                | 0  | 9   | 5                 | 4                 | 0   | 5540.822               | 5540.815                | 7.6                    |
| 9  | 6                | 3                | 1  | 9   | 5                 | 4                 | 1   | 5540.822               | 5540.815                | 7.6                    |
| 5  | 2                | 3                | 0  | 4   | 1                 | 3                 | 1   | 5546.614               | 5546.612                | 2.3                    |
| 5  | 2                | 3                | 1  | 4   | 1                 | 3                 | 0   | 5546.666               | 5546.663                | 3.2                    |
| 9  | 6                | 4                | 0  | 9   | 5                 | 5                 | 0   | 5579.707               | 5579.710                | -3.0                   |
| 9  | 6                | 4                | 1  | 9   | 5                 | 5                 | 1   | 5579.707               | 5579.710                | -3.0                   |
| 8  | 6                | 2                | 0  | 8   | 5                 | 3                 | 0   | 5608.308               | 5608.310                | -2.0                   |
| 8  | 6                | 2                | 1  | 8   | 5                 | 3                 | 1   | 5608.308               | 5608.310                | -2.0                   |
| 14 | 6                | 9                | 1  | 14  | 5                 | 10                | 1   | 5612.790               | 5612.806                | -15.9                  |
| 14 | 6                | 9                | 0  | 14  | 5                 | 10                | 0   | 5612.790               | 5612.806                | -15.9                  |
| 13 | 4                | 10               | 1  | 13  | 3                 | 11                | 1   | 5614.640               | 5614.668                | -27.4                  |
| 13 | 4                | 10               | 0  | 13  | 3                 | 11                | 0   | 5614.640               | 5614.668                | -27.4                  |
| 8  | 6                | 3                | 0  | 8   | 5                 | 4                 | 0   | 5620.153               | 5620.154                | -1.2                   |
| 8  | 6                | 3                | 1  | 8   | 5                 | 4                 | 1   | 5620.153               | 5620.154                | -1.2                   |
| 7  | 6                | 1                | 0  | 7   | 5                 | 2                 | 0   | 5649.471               | 5649.469                | 2.2                    |
| 7  | 6                | 1                | 1  | 7   | 5                 | 2                 | 1   | 5649.471               | 5649.469                | 2.2                    |
| 7  | 6                | 2                | 0  | 7   | 5                 | 3                 | 0   | 5652.329               | 5652.328                | 0.8                    |
| 7  | 6                | 2                | 1  | 7   | 5                 | 3                 | 1   | 5652.329               | 5652.328                | 0.8                    |
| 7  | 2                | 6                | 1  | 6   | 1                 | 5                 | 1   | 5657.059               | 5657.063                | -4.6                   |
| 7  | 2                | 6                | 0  | 6   | 1                 | 5                 | 0   | 5657.059               | 5657.063                | -4.6                   |
| 5  | 1                | 4                | 0  | 4   | 0                 | 4                 | 1   | 5661.077               | 5661.064                | 12.8                   |
| 5  | 1                | 4                | 1  | 4   | 0                 | 4                 | 0   | 5661.126               | 5661.118                | 7.9                    |

| J' | K <sub>a</sub> ' | K <sub>c</sub> ' | v' | J'' | K <sub>a</sub> '' | K <sub>c</sub> '' | v'' | $\nu_{obs}/\text{MHz}$ | $\nu_{calc}/\text{MHz}$ | $\Delta\nu/\text{kHz}$ |
|----|------------------|------------------|----|-----|-------------------|-------------------|-----|------------------------|-------------------------|------------------------|
| 4  | 3                | 2                | 0  | 3   | 2                 | 1                 | 0   | 5662.554               | 5662.552                | 2.0                    |
| 4  | 3                | 2                | 1  | 3   | 2                 | 1                 | 1   | 5662.554               | 5662.552                | 2.0                    |
| 6  | 6                | 0                | 0  | 6   | 5                 | 1                 | 0   | 5674.733               | 5674.734                | -0.6                   |
| 6  | 6                | 0                | 1  | 6   | 5                 | 1                 | 1   | 5674.733               | 5674.734                | -0.6                   |
| 6  | 6                | 1                | 0  | 6   | 5                 | 2                 | 0   | 5675.225               | 5675.226                | -0.9                   |
| 6  | 6                | 1                | 1  | 6   | 5                 | 2                 | 1   | 5675.225               | 5675.226                | -0.9                   |
| 4  | 3                | 1                | 1  | 3   | 2                 | 1                 | 0   | 5690.744               | 5690.767                | -23.5                  |
| 12 | 2                | 10               | 1  | 12  | 1                 | 11                | 1   | 5731.443               | 5731.453                | -9.2                   |
| 12 | 2                | 10               | 0  | 12  | 1                 | 11                | 0   | 5731.443               | 5731.453                | -9.2                   |
| 8  | 1                | 7                | 1  | 7   | 2                 | 6                 | 1   | 5800.842               | 5800.847                | -4.7                   |
| 8  | 1                | 7                | 0  | 7   | 2                 | 6                 | 0   | 5800.842               | 5800.847                | -4.7                   |
| 4  | 3                | 2                | 0  | 3   | 2                 | 2                 | 1   | 5808.810               | 5808.816                | -6.2                   |
| 4  | 3                | 2                | 1  | 3   | 2                 | 2                 | 0   | 5808.865               | 5808.864                | 1.1                    |
| 12 | 3                | 10               | 0  | 12  | 2                 | 11                | 0   | 5823.359               | 5823.359                | 0.4                    |
| 12 | 3                | 10               | 1  | 12  | 2                 | 11                | 1   | 5823.359               | 5823.359                | 0.4                    |
| 4  | 3                | 1                | 1  | 3   | 2                 | 2                 | 1   | 5837.033               | 5837.032                | 1.9                    |
| 4  | 3                | 1                | 0  | 3   | 2                 | 2                 | 0   | 5837.033               | 5837.032                | 1.9                    |
| 9  | 0                | 9                | 1  | 8   | 1                 | 8                 | 1   | 6001.152               | 6001.141                | 11.2                   |
| 9  | 0                | 9                | 0  | 8   | 1                 | 8                 | 0   | 6001.152               | 6001.141                | 11.2                   |
| 9  | 1                | 9                | 1  | 8   | 0                 | 8                 | 1   | 6007.249               | 6007.241                | 7.3                    |
| 9  | 1                | 9                | 0  | 8   | 0                 | 8                 | 0   | 6007.249               | 6007.241                | 7.3                    |
| 11 | 1                | 10               | 0  | 11  | 0                 | 11                | 0   | 6033.980               | 6033.981                | -1.5                   |
| 11 | 1                | 10               | 1  | 11  | 0                 | 11                | 1   | 6033.980               | 6033.981                | -1.5                   |
| 11 | 2                | 10               | 0  | 11  | 1                 | 11                | 0   | 6045.535               | 6045.521                | 14.1                   |
| 11 | 2                | 10               | 1  | 11  | 1                 | 11                | 1   | 6045.535               | 6045.521                | 14.1                   |
| 8  | 2                | 7                | 1  | 7   | 1                 | 6                 | 1   | 6153.191               | 6153.192                | -1.6                   |

| J' | K <sub>a</sub> ' | K <sub>c</sub> ' | v' | J'' | K <sub>a</sub> '' | K <sub>c</sub> '' | v'' | $\nu_{obs}/\text{MHz}$ | $\nu_{calc}/\text{MHz}$ | $\Delta\nu/\text{kHz}$ |
|----|------------------|------------------|----|-----|-------------------|-------------------|-----|------------------------|-------------------------|------------------------|
| 8  | 2                | 7                | 0  | 7   | 1                 | 6                 | 0   | 6153.191               | 6153.192                | -1.6                   |
| 5  | 2                | 4                | 0  | 4   | 1                 | 4                 | 1   | 6191.309               | 6191.296                | 13.1                   |
| 5  | 2                | 4                | 1  | 4   | 1                 | 4                 | 0   | 6191.363               | 6191.348                | 14.8                   |
| 5  | 3                | 3                | 1  | 4   | 2                 | 2                 | 1   | 6287.986               | 6287.992                | -5.3                   |
| 5  | 3                | 3                | 0  | 4   | 2                 | 2                 | 0   | 6287.986               | 6287.992                | -5.3                   |
| 13 | 7                | 6                | 0  | 13  | 6                 | 7                 | 0   | 6297.886               | 6297.878                | 7.8                    |
| 13 | 7                | 6                | 1  | 13  | 6                 | 7                 | 1   | 6297.886               | 6297.878                | 7.8                    |
| 10 | 3                | 7                | 0  | 9   | 4                 | 6                 | 0   | 6302.926               | 6302.935                | -9.0                   |
| 10 | 3                | 7                | 1  | 9   | 4                 | 6                 | 1   | 6302.926               | 6302.935                | -9.0                   |
| 15 | 7                | 9                | 0  | 15  | 6                 | 10                | 0   | 6364.921               | 6364.920                | 1.3                    |
| 15 | 7                | 9                | 1  | 15  | 6                 | 10                | 1   | 6364.921               | 6364.920                | 1.3                    |
| 13 | 2                | 11               | 0  | 13  | 1                 | 12                | 0   | 6368.451               | 6368.464                | -13.0                  |
| 13 | 2                | 11               | 1  | 13  | 1                 | 12                | 1   | 6368.451               | 6368.464                | -13.0                  |
| 14 | 7                | 8                | 0  | 14  | 6                 | 9                 | 0   | 6393.392               | 6393.391                | 0.5                    |
| 14 | 7                | 8                | 1  | 14  | 6                 | 9                 | 1   | 6393.392               | 6393.391                | 0.5                    |
| 5  | 3                | 2                | 0  | 4   | 2                 | 2                 | 1   | 6394.812               | 6394.818                | -5.8                   |
| 5  | 3                | 2                | 1  | 4   | 2                 | 2                 | 0   | 6394.863               | 6394.863                | 0.0                    |
| 13 | 3                | 11               | 0  | 13  | 2                 | 12                | 0   | 6413.031               | 6413.031                | 0.0                    |
| 13 | 3                | 11               | 1  | 13  | 2                 | 12                | 1   | 6413.031               | 6413.031                | 0.0                    |
| 9  | 2                | 7                | 1  | 8   | 3                 | 6                 | 1   | 6423.270               | 6423.266                | 4.5                    |
| 9  | 2                | 7                | 0  | 8   | 3                 | 6                 | 0   | 6423.270               | 6423.266                | 4.5                    |
| 12 | 7                | 5                | 0  | 12  | 6                 | 6                 | 0   | 6448.392               | 6448.413                | -20.9                  |
| 12 | 7                | 5                | 1  | 12  | 6                 | 6                 | 1   | 6448.392               | 6448.413                | -20.9                  |
| 9  | 1                | 8                | 0  | 8   | 2                 | 7                 | 0   | 6519.987               | 6519.987                | -0.8                   |
| 9  | 1                | 8                | 1  | 8   | 2                 | 7                 | 1   | 6519.987               | 6519.987                | -0.8                   |
| 11 | 7                | 4                | 0  | 11  | 6                 | 5                 | 0   | 6547.141               | 6547.130                | 11.2                   |

| J' | K <sub>a</sub> ' | K <sub>c</sub> ' | v' | J'' | K <sub>a</sub> '' | K <sub>c</sub> '' | v'' | $\nu_{obs}/\text{MHz}$ | $\nu_{calc}/\text{MHz}$ | $\Delta\nu/\text{kHz}$ |
|----|------------------|------------------|----|-----|-------------------|-------------------|-----|------------------------|-------------------------|------------------------|
| 11 | 7                | 4                | 1  | 11  | 6                 | 5                 | 1   | 6547.141               | 6547.130                | 11.2                   |
| 6  | 2                | 4                | 0  | 5   | 1                 | 4                 | 1   | 6559.041               | 6559.049                | -8.0                   |
| 6  | 2                | 4                | 1  | 5   | 1                 | 4                 | 0   | 6559.086               | 6559.099                | -13.2                  |
| 11 | 7                | 5                | 0  | 11  | 6                 | 6                 | 0   | 6569.214               | 6569.220                | -6.2                   |
| 11 | 7                | 5                | 1  | 11  | 6                 | 6                 | 1   | 6569.214               | 6569.220                | -6.2                   |
| 6  | 3                | 3                | 1  | 6   | 0                 | 6                 | 1   | 6593.904               | 6593.890                | 14.1                   |
| 6  | 3                | 3                | 0  | 6   | 0                 | 6                 | 0   | 6593.904               | 6593.890                | 14.1                   |
| 10 | 7                | 3                | 0  | 10  | 6                 | 4                 | 0   | 6613.120               | 6613.138                | -17.7                  |
| 10 | 7                | 3                | 1  | 10  | 6                 | 4                 | 1   | 6613.120               | 6613.138                | -17.7                  |
| 10 | 7                | 4                | 0  | 10  | 6                 | 5                 | 0   | 6620.045               | 6620.038                | 6.9                    |
| 10 | 7                | 4                | 1  | 10  | 6                 | 5                 | 1   | 6620.045               | 6620.038                | 6.9                    |
| 12 | 1                | 11               | 0  | 12  | 0                 | 12                | 0   | 6635.698               | 6635.696                | 1.6                    |
| 12 | 1                | 11               | 1  | 12  | 0                 | 12                | 1   | 6635.698               | 6635.696                | 1.6                    |
| 10 | 0                | 10               | 0  | 9   | 1                 | 9                 | 0   | 6636.808               | 6636.802                | 5.8                    |
| 10 | 0                | 10               | 1  | 9   | 1                 | 9                 | 1   | 6636.808               | 6636.802                | 5.8                    |
| 10 | 1                | 10               | 0  | 9   | 0                 | 9                 | 0   | 6639.251               | 6639.246                | 5.2                    |
| 10 | 1                | 10               | 1  | 9   | 0                 | 9                 | 1   | 6639.251               | 6639.246                | 5.2                    |
| 12 | 2                | 11               | 0  | 12  | 1                 | 12                | 0   | 6640.668               | 6640.671                | -2.9                   |
| 12 | 2                | 11               | 1  | 12  | 1                 | 12                | 1   | 6640.668               | 6640.671                | -2.9                   |
| 9  | 7                | 2                | 0  | 9   | 6                 | 3                 | 0   | 6658.297               | 6658.295                | 1.9                    |
| 9  | 7                | 2                | 1  | 9   | 6                 | 3                 | 1   | 6658.297               | 6658.295                | 1.9                    |
| 9  | 7                | 3                | 1  | 9   | 6                 | 4                 | 1   | 6660.104               | 6660.101                | 3.7                    |
| 9  | 7                | 3                | 0  | 9   | 6                 | 4                 | 0   | 6660.104               | 6660.101                | 3.7                    |
| 5  | 3                | 3                | 0  | 4   | 2                 | 3                 | 1   | 6684.873               | 6684.870                | 3.2                    |
| 5  | 3                | 3                | 1  | 4   | 2                 | 3                 | 0   | 6684.917               | 6684.917                | 0.6                    |
| 8  | 7                | 1                | 0  | 8   | 6                 | 2                 | 0   | 6689.490               | 6689.490                | -0.1                   |

| J' | K <sub>a</sub> ' | K <sub>c</sub> ' | v' | J'' | K <sub>a</sub> '' | K <sub>c</sub> '' | v'' | $\nu_{obs}/\text{MHz}$ | $\nu_{calc}/\text{MHz}$ | $\Delta\nu/\text{kHz}$ |
|----|------------------|------------------|----|-----|-------------------|-------------------|-----|------------------------|-------------------------|------------------------|
| 8  | 7                | 1                | 1  | 8   | 6                 | 2                 | 1   | 6689.490               | 6689.490                | -0.1                   |
| 8  | 7                | 2                | 0  | 8   | 6                 | 3                 | 0   | 6689.861               | 6689.863                | -2.6                   |
| 8  | 7                | 2                | 1  | 8   | 6                 | 3                 | 1   | 6689.861               | 6689.863                | -2.6                   |
| 9  | 2                | 8                | 0  | 8   | 1                 | 7                 | 0   | 6698.217               | 6698.217                | -0.2                   |
| 9  | 2                | 8                | 1  | 8   | 1                 | 7                 | 1   | 6698.217               | 6698.217                | -0.2                   |
| 7  | 7                | 0                | 0  | 7   | 6                 | 1                 | 0   | 6710.841               | 6710.846                | -5.5                   |
| 7  | 7                | 0                | 1  | 7   | 6                 | 1                 | 1   | 6710.841               | 6710.846                | -5.5                   |
| 7  | 7                | 1                | 0  | 7   | 6                 | 2                 | 0   | 6710.841               | 6710.846                | -5.5                   |
| 7  | 7                | 1                | 1  | 7   | 6                 | 2                 | 1   | 6710.841               | 6710.846                | -5.5                   |
| 4  | 4                | 1                | 1  | 3   | 3                 | 0                 | 1   | 6787.663               | 6787.660                | 2.8                    |
| 4  | 4                | 1                | 0  | 3   | 3                 | 0                 | 0   | 6787.663               | 6787.660                | 2.8                    |
| 4  | 4                | 0                | 0  | 3   | 3                 | 0                 | 1   | 6788.100               | 6788.096                | 4.1                    |
| 4  | 4                | 0                | 1  | 3   | 3                 | 0                 | 0   | 6788.148               | 6788.140                | 7.8                    |
| 5  | 3                | 2                | 1  | 4   | 2                 | 3                 | 1   | 6791.743               | 6791.742                | 0.6                    |
| 5  | 3                | 2                | 0  | 4   | 2                 | 3                 | 0   | 6791.743               | 6791.742                | 0.6                    |
| 4  | 4                | 0                | 1  | 3   | 3                 | 1                 | 1   | 6792.250               | 6792.253                | -3.1                   |
| 4  | 4                | 0                | 0  | 3   | 3                 | 1                 | 0   | 6792.250               | 6792.253                | -3.1                   |
| 6  | 3                | 4                | 0  | 5   | 2                 | 3                 | 0   | 6811.262               | 6811.266                | -4.5                   |
| 6  | 3                | 4                | 1  | 5   | 2                 | 3                 | 1   | 6811.262               | 6811.266                | -4.5                   |
| 6  | 1                | 5                | 0  | 5   | 0                 | 5                 | 1   | 6952.982               | 6952.969                | 12.8                   |
| 6  | 1                | 5                | 1  | 5   | 0                 | 5                 | 0   | 6953.033               | 6953.021                | 12.0                   |
| 5  | 2                | 3                | 1  | 4   | 1                 | 4                 | 1   | 6995.388               | 6995.388                | -0.2                   |
| 5  | 2                | 3                | 0  | 4   | 1                 | 4                 | 0   | 6995.388               | 6995.388                | -0.2                   |
| 14 | 3                | 12               | 0  | 14  | 2                 | 13                | 0   | 7009.918               | 7009.944                | -26.4                  |
| 14 | 3                | 12               | 1  | 14  | 2                 | 13                | 1   | 7009.918               | 7009.944                | -26.4                  |
| 6  | 3                | 3                | 0  | 5   | 2                 | 3                 | 1   | 7102.366               | 7102.374                | -7.9                   |

| J' | K <sub>a</sub> ' | K <sub>c</sub> ' | v' | J'' | K <sub>a</sub> '' | K <sub>c</sub> '' | v'' | $\nu_{obs}/\text{MHz}$ | $\nu_{calc}/\text{MHz}$ | $\Delta\nu/\text{kHz}$ |
|----|------------------|------------------|----|-----|-------------------|-------------------|-----|------------------------|-------------------------|------------------------|
| 6  | 3                | 3                | 1  | 5   | 2                 | 3                 | 0   | 7102.413               | 7102.416                | -3.4                   |
| 6  | 4                | 2                | 1  | 6   | 1                 | 5                 | 1   | 7119.290               | 7119.284                | 5.8                    |
| 6  | 4                | 2                | 0  | 6   | 1                 | 5                 | 0   | 7119.290               | 7119.284                | 5.8                    |
| 10 | 1                | 9                | 0  | 9   | 2                 | 8                 | 0   | 7197.768               | 7197.754                | 13.3                   |
| 10 | 1                | 9                | 1  | 9   | 2                 | 8                 | 1   | 7197.768               | 7197.754                | 13.3                   |
| 13 | 1                | 12               | 0  | 13  | 0                 | 13                | 0   | 7234.538               | 7234.548                | -10.6                  |
| 13 | 1                | 12               | 1  | 13  | 0                 | 13                | 1   | 7234.538               | 7234.548                | -10.6                  |
| 13 | 2                | 12               | 0  | 13  | 1                 | 13                | 0   | 7236.636               | 7236.643                | -7.1                   |
| 13 | 2                | 12               | 1  | 13  | 1                 | 13                | 1   | 7236.636               | 7236.643                | -7.1                   |
| 7  | 3                | 5                | 0  | 6   | 2                 | 4                 | 0   | 7246.056               | 7246.059                | -2.5                   |
| 7  | 3                | 5                | 1  | 6   | 2                 | 4                 | 1   | 7246.056               | 7246.059                | -2.5                   |
| 11 | 0                | 11               | 0  | 10  | 1                 | 10                | 0   | 7271.450               | 7271.443                | 7.0                    |
| 11 | 0                | 11               | 1  | 10  | 1                 | 10                | 1   | 7271.450               | 7271.443                | 7.0                    |
| 11 | 1                | 11               | 0  | 10  | 0                 | 10                | 0   | 7272.407               | 7272.404                | 3.6                    |
| 11 | 1                | 11               | 1  | 10  | 0                 | 10                | 1   | 7272.407               | 7272.404                | 3.6                    |
| 10 | 2                | 9                | 0  | 9   | 1                 | 8                 | 0   | 7282.487               | 7282.485                | 1.8                    |
| 10 | 2                | 9                | 1  | 9   | 1                 | 8                 | 1   | 7282.487               | 7282.485                | 1.8                    |
| 6  | 2                | 5                | 0  | 5   | 1                 | 5                 | 1   | 7307.078               | 7307.063                | 15.3                   |
| 6  | 2                | 5                | 1  | 5   | 1                 | 5                 | 0   | 7307.126               | 7307.114                | 12.3                   |
| 7  | 4                | 3                | 1  | 7   | 1                 | 6                 | 1   | 7351.041               | 7351.039                | 1.6                    |
| 7  | 4                | 3                | 0  | 7   | 1                 | 6                 | 0   | 7351.041               | 7351.039                | 1.6                    |
| 10 | 2                | 8                | 1  | 9   | 3                 | 7                 | 1   | 7377.551               | 7377.555                | -4.1                   |
| 10 | 2                | 8                | 0  | 9   | 3                 | 7                 | 0   | 7377.551               | 7377.555                | -4.1                   |
| 11 | 3                | 8                | 1  | 10  | 4                 | 7                 | 1   | 7555.645               | 7555.656                | -11.1                  |
| 11 | 3                | 8                | 0  | 10  | 4                 | 7                 | 0   | 7555.645               | 7555.656                | -11.1                  |
| 13 | 8                | 6                | 1  | 13  | 7                 | 7                 | 1   | 7561.011               | 7561.001                | 9.7                    |

| J' | K <sub>a</sub> ' | K <sub>c</sub> ' | v' | J'' | K <sub>a</sub> '' | K <sub>c</sub> '' | v'' | $\nu_{obs}/\text{MHz}$ | $\nu_{calc}/\text{MHz}$ | $\Delta\nu/\text{kHz}$ |
|----|------------------|------------------|----|-----|-------------------|-------------------|-----|------------------------|-------------------------|------------------------|
| 13 | 8                | 6                | 0  | 13  | 7                 | 7                 | 0   | 7561.011               | 7561.001                | 9.7                    |
| 5  | 4                | 2                | 1  | 4   | 3                 | 1                 | 1   | 7562.343               | 7562.339                | 3.8                    |
| 5  | 4                | 2                | 0  | 4   | 3                 | 1                 | 0   | 7562.343               | 7562.339                | 3.8                    |
| 5  | 4                | 1                | 0  | 4   | 3                 | 1                 | 1   | 7566.363               | 7566.366                | -3.7                   |
| 5  | 4                | 1                | 1  | 4   | 3                 | 1                 | 0   | 7566.402               | 7566.409                | -7.2                   |
| 5  | 4                | 2                | 0  | 4   | 3                 | 2                 | 1   | 7590.508               | 7590.509                | -1.1                   |
| 5  | 4                | 2                | 1  | 4   | 3                 | 2                 | 0   | 7590.543               | 7590.552                | -8.5                   |
| 5  | 4                | 1                | 1  | 4   | 3                 | 2                 | 1   | 7594.579               | 7594.579                | 0.5                    |
| 5  | 4                | 1                | 0  | 4   | 3                 | 2                 | 0   | 7594.579               | 7594.579                | 0.5                    |
| 6  | 3                | 4                | 0  | 5   | 2                 | 4                 | 1   | 7615.312               | 7615.308                | 4.1                    |
| 6  | 3                | 4                | 1  | 5   | 2                 | 4                 | 0   | 7615.355               | 7615.356                | -1.1                   |
| 8  | 3                | 6                | 0  | 7   | 2                 | 5                 | 0   | 7619.256               | 7619.252                | 3.8                    |
| 8  | 3                | 6                | 1  | 7   | 2                 | 5                 | 1   | 7619.256               | 7619.252                | 3.8                    |
| 11 | 8                | 3                | 0  | 11  | 7                 | 4                 | 0   | 7663.874               | 7663.867                | 7.1                    |
| 11 | 8                | 3                | 1  | 11  | 7                 | 4                 | 1   | 7663.874               | 7663.867                | 7.1                    |
| 11 | 8                | 4                | 1  | 11  | 7                 | 5                 | 1   | 7664.939               | 7664.933                | 6.9                    |
| 11 | 8                | 4                | 0  | 11  | 7                 | 5                 | 0   | 7664.939               | 7664.933                | 6.9                    |
| 7  | 2                | 5                | 0  | 6   | 1                 | 5                 | 1   | 7697.040               | 7697.043                | -2.9                   |
| 7  | 2                | 5                | 1  | 6   | 1                 | 5                 | 0   | 7697.040               | 7697.043                | -2.9                   |
| 11 | 1                | 10               | 0  | 10  | 2                 | 9                 | 0   | 7852.585               | 7852.601                | -15.4                  |
| 11 | 1                | 10               | 1  | 10  | 2                 | 9                 | 1   | 7852.585               | 7852.601                | -15.4                  |
| 7  | 3                | 4                | 0  | 6   | 2                 | 4                 | 1   | 7873.622               | 7873.626                | -4.1                   |
| 7  | 3                | 4                | 1  | 6   | 2                 | 4                 | 0   | 7873.650               | 7873.664                | -14.0                  |
| 11 | 2                | 10               | 0  | 10  | 1                 | 9                 | 0   | 7891.079               | 7891.086                | -6.6                   |
| 11 | 2                | 10               | 1  | 10  | 1                 | 9                 | 1   | 7891.079               | 7891.086                | -6.6                   |
| 12 | 0                | 12               | 0  | 11  | 1                 | 11                | 0   | 7905.684               | 7905.676                | 7.9                    |



| J' | K <sub>a</sub> ' | K <sub>c</sub> ' | v' | J'' | K <sub>a</sub> '' | K <sub>c</sub> '' | v'' | $\nu_{obs}/\text{MHz}$ | $\nu_{calc}/\text{MHz}$ | $\Delta\nu/\text{kHz}$ |
|----|------------------|------------------|----|-----|-------------------|-------------------|-----|------------------------|-------------------------|------------------------|
| 12 | 0                | 12               | 1  | 11  | 1                 | 11                | 1   | 7905.684               | 7905.676                | 7.9                    |
| 12 | 1                | 12               | 0  | 11  | 0                 | 11                | 0   | 7906.053               | 7906.048                | 5.4                    |
| 12 | 1                | 12               | 1  | 11  | 0                 | 11                | 1   | 7906.053               | 7906.048                | 5.4                    |
| 6  | 3                | 3                | 0  | 5   | 2                 | 4                 | 0   | 7906.463               | 7906.461                | 1.7                    |
| 6  | 3                | 3                | 1  | 5   | 2                 | 4                 | 1   | 7906.463               | 7906.461                | 1.7                    |
| 9  | 3                | 7                | 0  | 8   | 2                 | 6                 | 0   | 7968.749               | 7968.755                | -5.8                   |
| 9  | 3                | 7                | 1  | 8   | 2                 | 6                 | 1   | 7968.749               | 7968.755                | -5.8                   |

Table S39: Assigned rotational transitions for  $^{13}\text{C}_1$  isotopologue of the xanthene- $\text{H}_2\text{O}$  complex, 1w-I.

| J' | K <sub>a</sub> ' | K <sub>c</sub> ' | J'' | K <sub>a</sub> '' | K <sub>c</sub> '' | $\nu_{obs}/\text{MHz}$ | $\nu_{calc}/\text{MHz}$ | $\Delta\nu/\text{kHz}$ |
|----|------------------|------------------|-----|-------------------|-------------------|------------------------|-------------------------|------------------------|
| 3  | 2                | 2                | 3   | 1                 | 3                 | 2028.491               | 2028.493                | -1.2                   |
| 3  | 1                | 3                | 2   | 0                 | 2                 | 2436.577               | 2436.578                | -0.4                   |
| 4  | 0                | 4                | 3   | 1                 | 3                 | 2664.582               | 2664.581                | 1.1                    |
| 4  | 1                | 4                | 3   | 0                 | 3                 | 2986.584               | 2986.582                | 2.1                    |
| 5  | 1                | 4                | 4   | 2                 | 3                 | 3191.326               | 3191.330                | -4.6                   |
| 6  | 2                | 5                | 6   | 1                 | 6                 | 3216.189               | 3216.185                | 3.6                    |
| 2  | 2                | 0                | 1   | 1                 | 1                 | 3234.957               | 3234.962                | -5.6                   |
| 5  | 0                | 5                | 4   | 1                 | 4                 | 3381.863               | 3381.869                | -6.4                   |
| 5  | 1                | 5                | 4   | 0                 | 4                 | 3549.931               | 3549.932                | -1.1                   |
| 3  | 2                | 2                | 2   | 1                 | 1                 | 3690.348               | 3690.351                | -3.1                   |
| 8  | 3                | 5                | 7   | 4                 | 4                 | 3728.919               | 3728.904                | 15.5                   |
| 6  | 0                | 6                | 5   | 1                 | 5                 | 4060.014               | 4060.015                | -1.2                   |
| 6  | 1                | 6                | 5   | 0                 | 5                 | 4139.680               | 4139.684                | -4.0                   |

| J' | K <sub>a</sub> ' | K <sub>c</sub> ' | J'' | K <sub>a</sub> '' | K <sub>c</sub> '' | $\nu_{obs}/\text{MHz}$ | $\nu_{calc}/\text{MHz}$ | $\Delta\nu/\text{kHz}$ |
|----|------------------|------------------|-----|-------------------|-------------------|------------------------|-------------------------|------------------------|
| 6  | 1                | 5                | 5   | 2                 | 4                 | 4140.399               | 4140.406                | -6.6                   |
| 4  | 2                | 3                | 3   | 1                 | 2                 | 4247.641               | 4247.647                | -6.2                   |
| 3  | 2                | 1                | 2   | 1                 | 2                 | 4278.140               | 4278.164                | -24.6                  |
| 7  | 0                | 7                | 6   | 1                 | 6                 | 4715.053               | 4715.047                | 6.1                    |
| 5  | 2                | 4                | 4   | 1                 | 3                 | 4740.678               | 4740.680                | -2.1                   |
| 7  | 1                | 7                | 6   | 0                 | 6                 | 4750.420               | 4750.420                | 0.1                    |
| 3  | 3                | 0                | 3   | 0                 | 3                 | 4873.650               | 4873.638                | 12.1                   |
| 3  | 3                | 1                | 2   | 2                 | 0                 | 4944.134               | 4944.131                | 2.6                    |
| 3  | 3                | 0                | 2   | 2                 | 1                 | 4978.945               | 4978.941                | 3.6                    |
| 7  | 1                | 6                | 6   | 2                 | 5                 | 5009.548               | 5009.547                | 0.7                    |
| 6  | 2                | 5                | 5   | 1                 | 4                 | 5196.248               | 5196.252                | -4.1                   |
| 8  | 0                | 8                | 7   | 1                 | 7                 | 5358.201               | 5358.203                | -2.1                   |
| 8  | 1                | 8                | 7   | 0                 | 7                 | 5373.225               | 5373.220                | 5.0                    |
| 7  | 2                | 6                | 6   | 1                 | 5                 | 5654.046               | 5654.048                | -2.1                   |
| 8  | 1                | 7                | 7   | 2                 | 6                 | 5794.232               | 5794.239                | -7.1                   |
| 4  | 3                | 1                | 3   | 2                 | 2                 | 5834.716               | 5834.715                | 1.1                    |
| 9  | 0                | 9                | 8   | 1                 | 8                 | 5995.778               | 5995.779                | -0.6                   |
| 9  | 1                | 9                | 8   | 0                 | 8                 | 6001.959               | 6001.951                | 7.9                    |
| 8  | 2                | 7                | 7   | 1                 | 6                 | 6149.211               | 6149.220                | -9.5                   |
| 5  | 3                | 3                | 4   | 2                 | 2                 | 6286.243               | 6286.245                | -1.9                   |
| 9  | 2                | 7                | 8   | 3                 | 6                 | 6411.950               | 6411.957                | -6.6                   |
| 9  | 1                | 8                | 8   | 2                 | 7                 | 6513.355               | 6513.351                | 3.8                    |
| 10 | 0                | 10               | 9   | 1                 | 9                 | 6630.895               | 6630.895                | 0.0                    |
| 10 | 1                | 10               | 9   | 0                 | 9                 | 6633.378               | 6633.371                | 6.7                    |
| 9  | 2                | 8                | 8   | 1                 | 7                 | 6693.223               | 6693.226                | -2.8                   |
| 4  | 4                | 1                | 3   | 3                 | 0                 | 6786.500               | 6786.497                | 3.2                    |

| J' | K <sub>a</sub> ' | K <sub>c</sub> ' | J'' | K <sub>a</sub> '' | K <sub>c</sub> '' | $\nu_{obs}/\text{MHz}$ | $\nu_{calc}/\text{MHz}$ | $\Delta\nu/\text{kHz}$ |
|----|------------------|------------------|-----|-------------------|-------------------|------------------------|-------------------------|------------------------|
| 4  | 4                | 0                | 3   | 3                 | 1                 | 6791.057               | 6791.054                | 2.6                    |
| 7  | 3                | 5                | 6   | 2                 | 4                 | 7244.200               | 7244.197                | 3.1                    |
| 11 | 0                | 11               | 10  | 1                 | 10                | 7264.986               | 7264.980                | 6.1                    |
| 10 | 2                | 9                | 9   | 1                 | 8                 | 7276.570               | 7276.572                | -2.4                   |
| 5  | 4                | 2                | 4   | 3                 | 1                 | 7560.388               | 7560.382                | 6.2                    |
| 5  | 4                | 1                | 4   | 3                 | 2                 | 7592.376               | 7592.377                | -0.7                   |
| 6  | 3                | 3                | 5   | 2                 | 4                 | 7899.854               | 7899.858                | -3.8                   |
| 9  | 3                | 7                | 8   | 2                 | 6                 | 7966.266               | 7966.262                | 4.0                    |

Table S40: Assigned rotational transitions for  $^{13}\text{C}_2$  isotopologue of the xanthene-H<sub>2</sub>O complex, 1w-I.

| J' | K <sub>a</sub> ' | K <sub>c</sub> ' | J'' | K <sub>a</sub> '' | K <sub>c</sub> '' | $\nu_{obs}/\text{MHz}$ | $\nu_{calc}/\text{MHz}$ | $\Delta\nu/\text{kHz}$ |
|----|------------------|------------------|-----|-------------------|-------------------|------------------------|-------------------------|------------------------|
| 4  | 0                | 4                | 3   | 1                 | 3                 | 2655.037               | 2655.042                | -4.2                   |
| 5  | 3                | 3                | 5   | 2                 | 4                 | 2841.476               | 2841.469                | 7.8                    |
| 4  | 1                | 4                | 3   | 0                 | 3                 | 2978.499               | 2978.507                | -8.6                   |
| 5  | 0                | 5                | 4   | 1                 | 4                 | 3370.584               | 3370.592                | -8.3                   |
| 5  | 1                | 5                | 4   | 0                 | 4                 | 3539.846               | 3539.851                | -5.1                   |
| 6  | 0                | 6                | 5   | 1                 | 5                 | 4047.026               | 4047.028                | -1.5                   |
| 6  | 1                | 6                | 5   | 0                 | 5                 | 4127.467               | 4127.475                | -7.9                   |
| 4  | 2                | 3                | 3   | 1                 | 2                 | 4238.121               | 4238.135                | -13.7                  |
| 7  | 0                | 7                | 6   | 1                 | 6                 | 4700.289               | 4700.288                | 1.0                    |
| 5  | 2                | 4                | 4   | 1                 | 3                 | 4729.830               | 4729.836                | -5.9                   |
| 7  | 1                | 7                | 6   | 0                 | 6                 | 4736.092               | 4736.100                | -8.2                   |
| 3  | 3                | 1                | 2   | 2                 | 0                 | 4934.522               | 4934.528                | -6.4                   |

| J' | K <sub>a</sub> ' | K <sub>c</sub> ' | J'' | K <sub>a</sub> '' | K <sub>c</sub> '' | $\nu_{obs}/\text{MHz}$ | $\nu_{calc}/\text{MHz}$ | $\Delta\nu/\text{kHz}$ |
|----|------------------|------------------|-----|-------------------|-------------------|------------------------|-------------------------|------------------------|
| 3  | 3                | 0                | 2   | 2                 | 1                 | 4968.991               | 4968.995                | -3.7                   |
| 7  | 1                | 6                | 6   | 2                 | 5                 | 4990.434               | 4990.435                | -1.2                   |
| 6  | 2                | 5                | 5   | 1                 | 4                 | 5183.978               | 5183.985                | -6.6                   |
| 8  | 0                | 8                | 7   | 1                 | 7                 | 5341.604               | 5341.603                | 0.8                    |
| 8  | 1                | 8                | 7   | 0                 | 7                 | 5356.829               | 5356.846                | -16.8                  |
| 7  | 2                | 6                | 6   | 1                 | 5                 | 5639.911               | 5639.913                | -1.7                   |
| 4  | 3                | 2                | 3   | 2                 | 1                 | 5649.369               | 5649.365                | 3.2                    |
| 4  | 3                | 2                | 3   | 2                 | 1                 | 5649.369               | 5649.365                | 3.3                    |
| 8  | 1                | 7                | 7   | 2                 | 6                 | 5773.988               | 5773.988                | -0.1                   |
| 4  | 3                | 1                | 3   | 2                 | 2                 | 5821.321               | 5821.318                | 3.1                    |
| 9  | 0                | 9                | 8   | 1                 | 8                 | 5977.294               | 5977.290                | 4.0                    |
| 9  | 1                | 9                | 8   | 0                 | 8                 | 5983.563               | 5983.571                | -8.7                   |
| 8  | 2                | 7                | 7   | 1                 | 6                 | 6132.729               | 6132.728                | 1.2                    |
| 5  | 3                | 3                | 4   | 2                 | 2                 | 6273.047               | 6273.055                | -8.4                   |
| 9  | 1                | 8                | 8   | 2                 | 7                 | 6491.891               | 6491.889                | 1.4                    |
| 10 | 0                | 10               | 9   | 1                 | 9                 | 6610.487               | 6610.488                | -1.5                   |
| 10 | 1                | 10               | 9   | 0                 | 9                 | 6613.011               | 6613.015                | -3.6                   |
| 9  | 2                | 8                | 8   | 1                 | 7                 | 6674.187               | 6674.189                | -2.4                   |
| 5  | 3                | 2                | 4   | 2                 | 3                 | 6769.800               | 6769.811                | -11.5                  |
| 4  | 4                | 1                | 3   | 3                 | 0                 | 6773.397               | 6773.398                | -1.3                   |
| 4  | 4                | 0                | 3   | 3                 | 1                 | 6777.896               | 6777.890                | 6.4                    |
| 6  | 3                | 4                | 5   | 2                 | 3                 | 6795.266               | 6795.269                | -3.8                   |
| 10 | 1                | 9                | 9   | 2                 | 8                 | 7168.027               | 7168.027                | 0.7                    |
| 7  | 3                | 5                | 6   | 2                 | 4                 | 7229.290               | 7229.285                | 4.8                    |
| 11 | 0                | 11               | 10  | 1                 | 10                | 7242.665               | 7242.641                | 24.3                   |
| 10 | 2                | 9                | 9   | 1                 | 8                 | 7255.074               | 7255.081                | -7.5                   |

| J' | K <sub>a</sub> ' | K <sub>c</sub> ' | J'' | K <sub>a</sub> '' | K <sub>c</sub> '' | $\nu_{obs}/\text{MHz}$ | $\nu_{calc}/\text{MHz}$ | $\Delta\nu/\text{kHz}$ |
|----|------------------|------------------|-----|-------------------|-------------------|------------------------|-------------------------|------------------------|
| 5  | 4                | 2                | 4   | 3                 | 1                 | 7544.737               | 7544.722                | 15.1                   |
| 5  | 4                | 1                | 4   | 3                 | 2                 | 7576.267               | 7576.265                | 1.5                    |
| 11 | 1                | 10               | 10  | 2                 | 9                 | 7820.907               | 7820.895                | 12.2                   |
| 12 | 1                | 12               | 11  | 0                 | 11                | 7874.780               | 7874.760                | 19.7                   |
| 6  | 3                | 3                | 5   | 2                 | 4                 | 7876.075               | 7876.075                | -0.2                   |

Table S41: Assigned rotational transitions for  $^{13}\text{C}_3$  isotopologue of the xanthene- $\text{H}_2\text{O}$  complex, 1w-I.

| J' | K <sub>a</sub> ' | K <sub>c</sub> ' | J'' | K <sub>a</sub> '' | K <sub>c</sub> '' | $\nu_{obs}/\text{MHz}$ | $\nu_{calc}/\text{MHz}$ | $\Delta\nu/\text{kHz}$ |
|----|------------------|------------------|-----|-------------------|-------------------|------------------------|-------------------------|------------------------|
| 4  | 0                | 4                | 3   | 1                 | 3                 | 2638.838               | 2638.852                | -13.5                  |
| 4  | 1                | 4                | 3   | 0                 | 3                 | 2971.628               | 2971.621                | 6.7                    |
| 2  | 2                | 0                | 1   | 1                 | 1                 | 3227.776               | 3227.778                | -1.6                   |
| 5  | 0                | 5                | 4   | 1                 | 4                 | 3353.579               | 3353.593                | -14.2                  |
| 5  | 1                | 5                | 4   | 0                 | 4                 | 3529.611               | 3529.611                | 0.0                    |
| 8  | 3                | 5                | 7   | 4                 | 4                 | 3610.748               | 3610.733                | 14.4                   |
| 6  | 0                | 6                | 5   | 1                 | 5                 | 4028.988               | 4028.994                | -5.3                   |
| 6  | 1                | 6                | 5   | 0                 | 5                 | 4113.597               | 4113.595                | 2.0                    |
| 4  | 2                | 3                | 3   | 1                 | 2                 | 4236.723               | 4236.727                | -4.1                   |
| 3  | 2                | 1                | 2   | 1                 | 2                 | 4257.247               | 4257.247                | -0.9                   |
| 7  | 0                | 7                | 6   | 1                 | 6                 | 4680.742               | 4680.747                | -5.0                   |
| 5  | 2                | 4                | 4   | 1                 | 3                 | 4727.305               | 4727.302                | 3.1                    |
| 3  | 3                | 1                | 2   | 2                 | 0                 | 4939.167               | 4939.164                | 2.7                    |
| 3  | 3                | 0                | 2   | 2                 | 1                 | 4972.508               | 4972.511                | -3.4                   |
| 6  | 2                | 5                | 5   | 1                 | 4                 | 5179.636               | 5179.622                | 14.9                   |

| J' | K <sub>a</sub> ' | K <sub>c</sub> ' | J'' | K <sub>a</sub> '' | K <sub>c</sub> '' | $\nu_{obs}/\text{MHz}$ | $\nu_{calc}/\text{MHz}$ | $\Delta\nu/\text{kHz}$ |
|----|------------------|------------------|-----|-------------------|-------------------|------------------------|-------------------------|------------------------|
| 8  | 0                | 8                | 7   | 1                 | 7                 | 5320.154               | 5320.154                | 0.2                    |
| 8  | 1                | 8                | 7   | 0                 | 7                 | 5336.541               | 5336.543                | -1.3                   |
| 7  | 2                | 6                | 6   | 1                 | 5                 | 5631.889               | 5631.877                | 12.4                   |
| 4  | 3                | 2                | 3   | 2                 | 1                 | 5651.565               | 5651.563                | 1.8                    |
| 4  | 3                | 1                | 3   | 2                 | 2                 | 5818.053               | 5818.061                | -8.3                   |
| 9  | 0                | 9                | 8   | 1                 | 8                 | 5953.670               | 5953.668                | 1.6                    |
| 9  | 1                | 9                | 8   | 0                 | 8                 | 5960.504               | 5960.497                | 7.0                    |
| 5  | 3                | 3                | 4   | 2                 | 2                 | 6274.720               | 6274.722                | -1.6                   |
| 9  | 1                | 8                | 8   | 2                 | 7                 | 6460.144               | 6460.162                | -17.7                  |
| 10 | 0                | 10               | 9   | 1                 | 9                 | 6584.549               | 6584.547                | 2.2                    |
| 10 | 1                | 10               | 9   | 0                 | 9                 | 6587.324               | 6587.323                | 0.4                    |
| 4  | 4                | 1                | 3   | 3                 | 0                 | 6780.133               | 6780.124                | 8.5                    |
| 4  | 4                | 0                | 3   | 3                 | 1                 | 6784.384               | 6784.389                | -4.4                   |
| 6  | 3                | 4                | 5   | 2                 | 3                 | 6797.593               | 6797.587                | 5.7                    |
| 11 | 0                | 11               | 10  | 1                 | 10                | 7214.304               | 7214.303                | 1.6                    |
| 11 | 1                | 11               | 10  | 0                 | 10                | 7215.401               | 7215.410                | -9.6                   |
| 10 | 2                | 9                | 9   | 1                 | 8                 | 7230.604               | 7230.604                | 0.0                    |
| 7  | 3                | 5                | 6   | 2                 | 4                 | 7232.471               | 7232.457                | 13.9                   |
| 5  | 4                | 2                | 4   | 3                 | 1                 | 7547.646               | 7547.650                | -3.5                   |
| 5  | 4                | 1                | 4   | 3                 | 2                 | 7577.605               | 7577.610                | -4.4                   |

Table S42: Assigned rotational transitions for  $^{13}\text{C}_4$  isotopologue of the xanthene- $\text{H}_2\text{O}$  complex, 1w-I.

| J' | $K_a'$ | $K_c'$ | J'' | $K_a''$ | $K_c''$ | $\nu_{obs}/\text{MHz}$ | $\nu_{calc}/\text{MHz}$ | $\Delta\nu/\text{kHz}$ |
|----|--------|--------|-----|---------|---------|------------------------|-------------------------|------------------------|
| 3  | 1      | 3      | 2   | 0       | 2       | 2423.091               | 2423.100                | -8.3                   |
| 4  | 0      | 4      | 3   | 1       | 3       | 2637.182               | 2637.197                | -14.9                  |
| 4  | 1      | 4      | 3   | 0       | 3       | 2968.332               | 2968.344                | -11.6                  |
| 5  | 1      | 4      | 4   | 2       | 3       | 3139.470               | 3139.482                | -12.2                  |
| 5  | 0      | 5      | 4   | 1       | 4       | 3351.012               | 3351.027                | -14.5                  |
| 5  | 1      | 5      | 4   | 0       | 4       | 3525.924               | 3525.936                | -12.5                  |
| 3  | 2      | 2      | 2   | 1       | 1       | 3677.718               | 3677.726                | -7.5                   |
| 6  | 0      | 6      | 5   | 1       | 5       | 4025.588               | 4025.588                | -0.5                   |
| 6  | 1      | 5      | 5   | 2       | 4       | 4084.505               | 4084.493                | 12.4                   |
| 6  | 1      | 6      | 5   | 0       | 5       | 4109.524               | 4109.532                | -8.3                   |
| 7  | 2      | 5      | 6   | 3       | 4       | 4130.253               | 4130.246                | 6.6                    |
| 4  | 2      | 3      | 3   | 1       | 2       | 4231.288               | 4231.300                | -11.2                  |
| 7  | 0      | 7      | 6   | 1       | 6       | 4676.582               | 4676.590                | -7.9                   |
| 7  | 1      | 7      | 6   | 0       | 6       | 4714.313               | 4714.323                | -10.1                  |
| 7  | 1      | 7      | 6   | 0       | 6       | 4714.313               | 4714.323                | -10.1                  |
| 3  | 3      | 1      | 2   | 2       | 0       | 4932.366               | 4932.359                | 7.7                    |
| 7  | 1      | 6      | 6   | 2       | 5       | 4952.505               | 4952.495                | 9.8                    |
| 3  | 3      | 0      | 2   | 2       | 1       | 4965.822               | 4965.817                | 4.9                    |
| 6  | 2      | 5      | 5   | 1       | 4       | 5173.083               | 5173.081                | 1.9                    |
| 8  | 0      | 8      | 7   | 1       | 7       | 5315.308               | 5315.312                | -4.7                   |
| 8  | 1      | 8      | 7   | 0       | 7       | 5331.521               | 5331.527                | -6.5                   |
| 7  | 2      | 6      | 6   | 1       | 5       | 5625.107               | 5625.086                | 21.5                   |
| 4  | 3      | 2      | 3   | 2       | 1       | 5644.079               | 5644.073                | 6.0                    |
| 4  | 3      | 1      | 3   | 2       | 2       | 5811.108               | 5811.110                | -1.9                   |

| J' | K <sub>a</sub> ' | K <sub>c</sub> ' | J'' | K <sub>a</sub> '' | K <sub>c</sub> '' | $\nu_{obs}/\text{MHz}$ | $\nu_{calc}/\text{MHz}$ | $\Delta\nu/\text{kHz}$ |
|----|------------------|------------------|-----|-------------------|-------------------|------------------------|-------------------------|------------------------|
| 9  | 0                | 9                | 8   | 1                 | 8                 | 5948.185               | 5948.184                | 1.2                    |
| 9  | 1                | 9                | 8   | 0                 | 8                 | 5954.931               | 5954.931                | 0.7                    |
| 5  | 3                | 3                | 4   | 2                 | 2                 | 6266.382               | 6266.389                | -6.6                   |
| 10 | 0                | 10               | 9   | 1                 | 9                 | 6578.454               | 6578.441                | 12.6                   |
| 10 | 1                | 10               | 9   | 0                 | 9                 | 6581.192               | 6581.181                | 10.8                   |
| 5  | 3                | 2                | 4   | 2                 | 3                 | 6749.589               | 6749.603                | -14.8                  |
| 4  | 4                | 1                | 3   | 3                 | 0                 | 6770.765               | 6770.760                | 5.5                    |
| 4  | 4                | 0                | 3   | 3                 | 1                 | 6775.055               | 6775.050                | 5.3                    |
| 6  | 3                | 4                | 5   | 2                 | 3                 | 6788.368               | 6788.359                | 8.8                    |
| 11 | 0                | 11               | 10  | 1                 | 10                | 7207.598               | 7207.587                | 11.1                   |
| 5  | 4                | 2                | 4   | 3                 | 1                 | 7537.722               | 7537.724                | -1.5                   |
| 5  | 4                | 1                | 4   | 3                 | 2                 | 7567.855               | 7567.860                | -5.4                   |

Table S43: Assigned rotational transitions for  $^{13}\text{C}_5$  isotopologue of the xanthene- $\text{H}_2\text{O}$  complex, 1w-I.

| J' | K <sub>a</sub> ' | K <sub>c</sub> ' | J'' | K <sub>a</sub> '' | K <sub>c</sub> '' | $\nu_{obs}/\text{MHz}$ | $\nu_{calc}/\text{MHz}$ | $\Delta\nu/\text{kHz}$ |
|----|------------------|------------------|-----|-------------------|-------------------|------------------------|-------------------------|------------------------|
| 3  | 1                | 3                | 2   | 0                 | 2                 | 2424.241               | 2424.251                | -9.4                   |
| 4  | 0                | 4                | 3   | 1                 | 3                 | 2652.502               | 2652.507                | -5.5                   |
| 4  | 1                | 4                | 3   | 0                 | 3                 | 2971.628               | 2971.611                | 16.9                   |
| 5  | 0                | 5                | 4   | 1                 | 4                 | 3366.076               | 3366.072                | 3.1                    |
| 5  | 1                | 5                | 4   | 0                 | 4                 | 3532.366               | 3532.371                | -5.5                   |
| 6  | 0                | 6                | 5   | 1                 | 5                 | 4040.727               | 4040.727                | 0.4                    |
| 6  | 1                | 6                | 5   | 0                 | 5                 | 4119.441               | 4119.436                | 4.8                    |
| 4  | 2                | 3                | 3   | 1                 | 2                 | 4225.568               | 4225.557                | 10.5                   |



| J' | K <sub>a</sub> ' | K <sub>c</sub> ' | J'' | K <sub>a</sub> '' | K <sub>c</sub> '' | $\nu_{obs}/\text{MHz}$ | $\nu_{calc}/\text{MHz}$ | $\Delta\nu/\text{kHz}$ |
|----|------------------|------------------|-----|-------------------|-------------------|------------------------|-------------------------|------------------------|
| 3  | 2                | 1                | 2   | 1                 | 2                 | 4257.247               | 4257.265                | -18.7                  |
| 7  | 0                | 7                | 6   | 1                 | 6                 | 4692.443               | 4692.450                | -7.0                   |
| 5  | 2                | 4                | 4   | 1                 | 3                 | 4716.050               | 4716.044                | 6.2                    |
| 7  | 1                | 7                | 6   | 0                 | 6                 | 4727.335               | 4727.343                | -7.5                   |
| 3  | 3                | 1                | 2   | 2                 | 0                 | 4917.906               | 4917.912                | -5.7                   |
| 7  | 1                | 6                | 6   | 2                 | 5                 | 4987.661               | 4987.653                | 7.9                    |
| 6  | 2                | 5                | 5   | 1                 | 4                 | 5169.359               | 5169.363                | -3.8                   |
| 8  | 0                | 8                | 7   | 1                 | 7                 | 5332.411               | 5332.412                | -1.3                   |
| 7  | 2                | 6                | 6   | 1                 | 5                 | 5625.145               | 5625.155                | -10.5                  |
| 4  | 3                | 2                | 3   | 2                 | 1                 | 5631.365               | 5631.368                | -2.2                   |
| 8  | 1                | 7                | 7   | 2                 | 6                 | 5767.845               | 5767.841                | 3.7                    |
| 4  | 3                | 1                | 3   | 2                 | 2                 | 5804.895               | 5804.894                | 0.3                    |
| 9  | 0                | 9                | 8   | 1                 | 8                 | 5966.864               | 5966.858                | 5.7                    |
| 9  | 1                | 9                | 8   | 0                 | 8                 | 5972.924               | 5972.928                | -4.1                   |
| 5  | 3                | 3                | 4   | 2                 | 2                 | 6253.226               | 6253.227                | -0.6                   |
| 9  | 1                | 8                | 8   | 2                 | 7                 | 6482.904               | 6482.908                | -4.1                   |
| 10 | 1                | 10               | 9   | 0                 | 9                 | 6601.307               | 6601.308                | -1.0                   |
| 9  | 2                | 8                | 8   | 1                 | 7                 | 6660.234               | 6660.230                | 4.3                    |
| 4  | 4                | 1                | 3   | 3                 | 0                 | 6750.486               | 6750.484                | 2.4                    |
| 5  | 3                | 2                | 4   | 2                 | 3                 | 6754.233               | 6754.230                | 2.9                    |
| 4  | 4                | 0                | 3   | 3                 | 1                 | 6755.054               | 6755.050                | 3.5                    |
| 6  | 3                | 4                | 5   | 2                 | 3                 | 6773.473               | 6773.471                | 2.0                    |
| 10 | 1                | 9                | 9   | 2                 | 8                 | 7156.821               | 7156.818                | 2.9                    |
| 5  | 4                | 1                | 4   | 3                 | 2                 | 7552.837               | 7552.835                | 2.3                    |

Table S44: Assigned rotational transitions for  $^{13}\text{C}_6$  isotopologue of the xanthene- $\text{H}_2\text{O}$  complex, 1w-I.

| J' | $K_a'$ | $K_c'$ | J'' | $K_a''$ | $K_c''$ | $\nu_{obs}/\text{MHz}$ | $\nu_{calc}/\text{MHz}$ | $\Delta\nu/\text{kHz}$ |
|----|--------|--------|-----|---------|---------|------------------------|-------------------------|------------------------|
| 4  | 1      | 3      | 3   | 2       | 2       | 2199.700               | 2199.699                | 1.0                    |
| 4  | 0      | 4      | 3   | 1       | 3       | 2663.831               | 2663.833                | -1.8                   |
| 4  | 3      | 2      | 4   | 2       | 3       | 2698.462               | 2698.446                | 16.7                   |
| 6  | 1      | 5      | 6   | 0       | 6       | 2831.026               | 2831.028                | -2.4                   |
| 5  | 3      | 3      | 5   | 2       | 4       | 2836.908               | 2836.907                | 0.9                    |
| 4  | 1      | 4      | 3   | 0       | 3       | 2982.843               | 2982.845                | -2.6                   |
| 2  | 2      | 1      | 1   | 1       | 0       | 3050.437               | 3050.449                | -11.8                  |
| 5  | 1      | 4      | 4   | 2       | 3       | 3194.904               | 3194.906                | -2.2                   |
| 2  | 2      | 0      | 1   | 1       | 1       | 3228.910               | 3228.917                | -7.0                   |
| 5  | 0      | 5      | 4   | 1       | 4       | 3380.002               | 3380.003                | -0.9                   |
| 5  | 1      | 5      | 4   | 0       | 4       | 3546.034               | 3546.038                | -3.9                   |
| 3  | 2      | 2      | 2   | 1       | 1       | 3683.408               | 3683.405                | 2.2                    |
| 6  | 0      | 6      | 5   | 1       | 5       | 4057.169               | 4057.170                | -1.2                   |
| 6  | 1      | 6      | 5   | 0       | 5       | 4135.642               | 4135.649                | -7.6                   |
| 6  | 1      | 5      | 5   | 2       | 4       | 4142.349               | 4142.351                | -2.0                   |
| 4  | 2      | 3      | 3   | 1       | 2       | 4240.068               | 4240.077                | -8.3                   |
| 7  | 0      | 7      | 6   | 1       | 6       | 4711.389               | 4711.392                | -3.0                   |
| 7  | 0      | 7      | 6   | 1       | 6       | 4711.389               | 4711.392                | -2.8                   |
| 5  | 2      | 4      | 4   | 1       | 3       | 4732.504               | 4732.508                | -4.0                   |
| 7  | 1      | 7      | 6   | 0       | 6       | 4746.141               | 4746.136                | 5.1                    |
| 3  | 3      | 1      | 2   | 2       | 0       | 4933.615               | 4933.620                | -5.2                   |
| 3  | 3      | 0      | 2   | 2       | 1       | 4968.660               | 4968.660                | -0.2                   |
| 7  | 1      | 6      | 6   | 2       | 5       | 5009.401               | 5009.400                | 1.2                    |
| 6  | 2      | 5      | 5   | 1       | 4       | 5187.742               | 5187.745                | -2.2                   |

| J' | K <sub>a</sub> ' | K <sub>c</sub> ' | J'' | K <sub>a</sub> '' | K <sub>c</sub> '' | $\nu_{obs}/\text{MHz}$ | $\nu_{calc}/\text{MHz}$ | $\Delta\nu/\text{kHz}$ |
|----|------------------|------------------|-----|-------------------|-------------------|------------------------|-------------------------|------------------------|
| 8  | 0                | 8                | 7   | 1                 | 7                 | 5353.880               | 5353.863                | 17.6                   |
| 8  | 1                | 8                | 7   | 0                 | 7                 | 5368.575               | 5368.570                | 5.0                    |
| 7  | 2                | 6                | 6   | 1                 | 5                 | 5645.679               | 5645.688                | -8.9                   |
| 4  | 3                | 2                | 3   | 2                 | 1                 | 5649.875               | 5649.873                | 1.8                    |
| 8  | 1                | 7                | 7   | 2                 | 6                 | 5792.024               | 5792.024                | -0.5                   |
| 4  | 3                | 1                | 3   | 2                 | 2                 | 5824.619               | 5824.614                | 5.8                    |
| 9  | 0                | 9                | 8   | 1                 | 8                 | 5990.835               | 5990.830                | 4.5                    |
| 9  | 1                | 9                | 8   | 0                 | 8                 | 5996.861               | 5996.858                | 2.8                    |
| 8  | 2                | 7                | 7   | 1                 | 6                 | 6141.381               | 6141.384                | -3.0                   |
| 5  | 3                | 3                | 4   | 2                 | 2                 | 6274.009               | 6274.014                | -4.6                   |
| 10 | 0                | 10               | 9   | 1                 | 9                 | 6625.387               | 6625.380                | 6.9                    |
| 9  | 2                | 8                | 8   | 1                 | 7                 | 6685.896               | 6685.905                | -8.2                   |
| 4  | 4                | 1                | 3   | 3                 | 0                 | 6771.969               | 6771.973                | -3.4                   |
| 4  | 4                | 0                | 3   | 3                 | 1                 | 6776.589               | 6776.582                | 6.4                    |
| 5  | 3                | 2                | 4   | 2                 | 3                 | 6778.430               | 6778.424                | 6.4                    |
| 6  | 3                | 4                | 5   | 2                 | 3                 | 6796.080               | 6796.082                | -1.2                   |
| 7  | 3                | 5                | 6   | 2                 | 4                 | 7229.851               | 7229.845                | 5.4                    |
| 5  | 4                | 1                | 4   | 3                 | 2                 | 7577.759               | 7577.762                | -2.2                   |

Table S45: Assigned rotational transitions for  $^{13}\text{C}_7$  isotopologue of the xanthene- $\text{H}_2\text{O}$  complex, 1w-I.

| J' | K <sub>a</sub> ' | K <sub>c</sub> ' | J'' | K <sub>a</sub> '' | K <sub>c</sub> '' | $\nu_{obs}/\text{MHz}$ | $\nu_{calc}/\text{MHz}$ | $\Delta\nu/\text{kHz}$ |
|----|------------------|------------------|-----|-------------------|-------------------|------------------------|-------------------------|------------------------|
| 3  | 1                | 3                | 2   | 0                 | 8                 | 2428.141               | 2428.141                | 0.0                    |
| 4  | 1                | 4                | 3   | 0                 | 4                 | 2977.883               | 2977.893                | -10.6                  |

| J' | K <sub>a</sub> ' | K <sub>c</sub> ' | J'' | K <sub>a</sub> '' | K <sub>c</sub> '' | $\nu_{obs}/\text{MHz}$ | $\nu_{calc}/\text{MHz}$ | $\Delta\nu/\text{kHz}$ |
|----|------------------|------------------|-----|-------------------|-------------------|------------------------|-------------------------|------------------------|
| 5  | 0                | 5                | 4   | 1                 | 6                 | 3380.890               | 3380.884                | 5.8                    |
| 5  | 1                | 5                | 4   | 0                 | 4                 | 3541.726               | 3541.733                | -7.5                   |
| 6  | 0                | 6                | 5   | 1                 | 5                 | 4056.614               | 4056.623                | -9.2                   |
| 6  | 1                | 6                | 5   | 0                 | 5                 | 4132.060               | 4132.055                | 4.7                    |
| 7  | 0                | 7                | 6   | 1                 | 5                 | 4709.849               | 4709.843                | 6.1                    |
| 7  | 1                | 7                | 6   | 0                 | 6                 | 4742.974               | 4742.978                | -4.7                   |
| 7  | 1                | 6                | 6   | 2                 | 2                 | 5017.412               | 5017.418                | -6.3                   |
| 6  | 2                | 5                | 5   | 1                 | 5                 | 5173.328               | 5173.331                | -3.6                   |
| 4  | 3                | 2                | 3   | 2                 | 4                 | 5627.761               | 5627.764                | -3.6                   |
| 4  | 3                | 1                | 3   | 2                 | 1                 | 5805.718               | 5805.711                | 6.5                    |
| 9  | 0                | 9                | 8   | 1                 | 3                 | 5988.120               | 5988.122                | -2.0                   |
| 9  | 1                | 9                | 8   | 0                 | 8                 | 5993.780               | 5993.782                | -2.3                   |
| 5  | 3                | 3                | 4   | 2                 | 2                 | 6250.291               | 6250.293                | -2.1                   |
| 4  | 4                | 1                | 3   | 3                 | 2                 | 6742.225               | 6742.223                | 1.4                    |
| 4  | 4                | 0                | 3   | 3                 | 0                 | 6746.979               | 6746.982                | -3.3                   |
| 11 | 1                | 11               | 10  | 0                 | 1                 | 7256.406               | 7256.392                | 14.4                   |
| 5  | 4                | 1                | 4   | 3                 | 10                | 7549.113               | 7549.110                | 3.8                    |

### 3.3 Frequency list of the xanthene-(H<sub>2</sub>O)<sub>2</sub> complex

Table S46: Assigned rotational transitions for the xanthene-(H<sub>2</sub>O)<sub>2</sub> complex, 2w-III.

| J' | K <sub>a</sub> ' | K <sub>c</sub> ' | J'' | K <sub>a</sub> '' | K <sub>c</sub> '' | $\nu_{obs}/\text{MHz}$ | $\nu_{calc}/\text{MHz}$ | $\Delta\nu/\text{kHz}$ |
|----|------------------|------------------|-----|-------------------|-------------------|------------------------|-------------------------|------------------------|
| 3  | 1                | 2                | 2   | 1                 | 1                 | 2157.425               | 2157.411                | 14.2                   |
| 7  | 2                | 5                | 7   | 2                 | 6                 | 2240.000               | 2239.997                | 3.0                    |

| J' | K <sub>a</sub> ' | K <sub>c</sub> ' | J'' | K <sub>a</sub> '' | K <sub>c</sub> '' | $\nu_{obs}/\text{MHz}$ | $\nu_{calc}/\text{MHz}$ | $\Delta\nu/\text{kHz}$ |
|----|------------------|------------------|-----|-------------------|-------------------|------------------------|-------------------------|------------------------|
| 4  | 1                | 4                | 3   | 1                 | 3                 | 2256.573               | 2256.574                | -0.2                   |
| 4  | 0                | 4                | 3   | 0                 | 3                 | 2287.405               | 2287.408                | -2.5                   |
| 4  | 1                | 4                | 3   | 0                 | 3                 | 2303.216               | 2303.189                | 27.0                   |
| 4  | 2                | 3                | 3   | 2                 | 2                 | 2592.335               | 2592.330                | 5.8                    |
| 3  | 2                | 2                | 2   | 1                 | 1                 | 2597.007               | 2597.007                | -0.3                   |
| 4  | 3                | 2                | 3   | 3                 | 1                 | 2720.666               | 2720.662                | 3.7                    |
| 5  | 0                | 5                | 4   | 1                 | 4                 | 2771.470               | 2771.473                | -2.6                   |
| 4  | 1                | 3                | 3   | 1                 | 2                 | 2776.243               | 2776.234                | -1.8                   |
| 5  | 1                | 5                | 4   | 1                 | 4                 | 2776.243               | 2776.253                | -1.8                   |
| 5  | 0                | 5                | 4   | 0                 | 4                 | 2787.254               | 2787.254                | 0.4                    |
| 4  | 2                | 2                | 3   | 2                 | 1                 | 2939.937               | 2939.929                | 8.0                    |
| 9  | 5                | 5                | 9   | 3                 | 6                 | 2971.628               | 2971.626                | 1.8                    |
| 10 | 4                | 6                | 9   | 6                 | 3                 | 3137.992               | 3137.987                | 5.0                    |
| 5  | 2                | 4                | 4   | 2                 | 3                 | 3173.024               | 3173.019                | 4.9                    |
| 6  | 0                | 6                | 5   | 1                 | 5                 | 3288.283               | 3288.289                | -5.2                   |
| 6  | 1                | 6                | 5   | 1                 | 5                 | 3289.639               | 3289.642                | -2.8                   |
| 6  | 0                | 6                | 5   | 0                 | 5                 | 3293.062               | 3293.069                | -7.2                   |
| 6  | 1                | 6                | 5   | 0                 | 5                 | 3294.428               | 3294.423                | 4.7                    |
| 5  | 1                | 4                | 4   | 1                 | 3                 | 3309.877               | 3309.877                | -0.3                   |
| 3  | 3                | 0                | 2   | 2                 | 0                 | 3371.696               | 3371.697                | -1.5                   |
| 5  | 3                | 3                | 4   | 3                 | 2                 | 3388.555               | 3388.548                | 7.1                    |
| 3  | 3                | 1                | 2   | 2                 | 1                 | 3413.795               | 3413.799                | -4.0                   |
| 5  | 4                | 2                | 4   | 4                 | 1                 | 3422.303               | 3422.292                | 10.5                   |
| 3  | 3                | 0                | 2   | 2                 | 1                 | 3428.512               | 3428.511                | 1.7                    |
| 5  | 3                | 2                | 4   | 3                 | 1                 | 3601.904               | 3601.887                | 16.9                   |
| 5  | 2                | 3                | 4   | 2                 | 2                 | 3660.216               | 3660.213                | 3.0                    |

| J' | K <sub>a</sub> ' | K <sub>c</sub> ' | J'' | K <sub>a</sub> '' | K <sub>c</sub> '' | $\nu_{obs}/\text{MHz}$ | $\nu_{calc}/\text{MHz}$ | $\Delta\nu/\text{kHz}$ |
|----|------------------|------------------|-----|-------------------|-------------------|------------------------|-------------------------|------------------------|
| 6  | 1                | 5                | 5   | 2                 | 4                 | 3677.718               | 3677.712                | 6.6                    |
| 6  | 2                | 5                | 5   | 2                 | 4                 | 3723.692               | 3723.681                | 11.4                   |
| 6  | 1                | 5                | 5   | 1                 | 4                 | 3796.544               | 3796.546                | -1.8                   |
| 7  | 0                | 7                | 6   | 1                 | 6                 | 3800.286               | 3800.283                | 2.8                    |
| 7  | 1                | 7                | 6   | 1                 | 6                 | 3800.641               | 3800.650                | -8.6                   |
| 7  | 0                | 7                | 6   | 0                 | 6                 | 3801.633               | 3801.637                | -4.0                   |
| 4  | 3                | 2                | 3   | 2                 | 1                 | 3910.841               | 3910.856                | -15.2                  |
| 4  | 2                | 3                | 3   | 1                 | 3                 | 3914.307               | 3914.287                | 19.5                   |
| 4  | 3                | 1                | 3   | 2                 | 1                 | 4003.967               | 4003.955                | 11.2                   |
| 6  | 3                | 4                | 5   | 3                 | 3                 | 4026.397               | 4026.395                | 2.4                    |
| 6  | 4                | 3                | 5   | 4                 | 2                 | 4123.840               | 4123.840                | -0.4                   |
| 4  | 3                | 2                | 3   | 2                 | 2                 | 4155.869               | 4155.862                | 7.1                    |
| 6  | 4                | 2                | 5   | 4                 | 1                 | 4213.775               | 4213.764                | 11.6                   |
| 4  | 3                | 1                | 3   | 2                 | 2                 | 4248.976               | 4248.961                | 14.8                   |
| 7  | 2                | 6                | 6   | 2                 | 5                 | 4253.046               | 4253.056                | -10.5                  |
| 7  | 1                | 6                | 6   | 1                 | 5                 | 4283.275               | 4283.278                | -2.9                   |
| 6  | 2                | 4                | 5   | 2                 | 3                 | 4297.779               | 4297.773                | 5.7                    |
| 8  | 1                | 8                | 7   | 1                 | 7                 | 4310.889               | 4310.894                | -4.8                   |
| 8  | 0                | 8                | 7   | 0                 | 7                 | 4311.158               | 4311.164                | -5.9                   |
| 5  | 2                | 3                | 4   | 1                 | 3                 | 4508.516               | 4508.511                | 5.6                    |
| 4  | 4                | 1                | 3   | 3                 | 1                 | 4619.401               | 4619.401                | -0.4                   |
| 4  | 4                | 0                | 3   | 3                 | 1                 | 4622.528               | 4622.527                | 1.0                    |
| 7  | 3                | 5                | 6   | 3                 | 4                 | 4627.512               | 4627.507                | 4.4                    |
| 5  | 3                | 2                | 4   | 2                 | 2                 | 4665.907               | 4665.913                | -6.1                   |
| 4  | 3                | 1                | 3   | 1                 | 2                 | 4688.545               | 4688.558                | -12.7                  |
| 8  | 2                | 7                | 7   | 2                 | 6                 | 4770.641               | 4770.639                | 1.1                    |

| J' | K <sub>a</sub> ' | K <sub>c</sub> ' | J'' | K <sub>a</sub> '' | K <sub>c</sub> '' | $\nu_{obs}/\text{MHz}$ | $\nu_{calc}/\text{MHz}$ | $\Delta\nu/\text{kHz}$ |
|----|------------------|------------------|-----|-------------------|-------------------|------------------------|-------------------------|------------------------|
| 8  | 1                | 7                | 7   | 1                 | 6                 | 4781.404               | 4781.404                | 0.3                    |
| 8  | 2                | 7                | 7   | 1                 | 6                 | 4786.389               | 4786.387                | 1.9                    |
| 7  | 4                | 4                | 6   | 4                 | 3                 | 4810.361               | 4810.357                | 4.3                    |
| 9  | 0                | 9                | 8   | 1                 | 8                 | 4820.921               | 4820.900                | 2.0                    |
| 9  | 1                | 9                | 8   | 1                 | 8                 | 4820.921               | 4820.925                | 2.0                    |
| 9  | 0                | 9                | 8   | 0                 | 8                 | 4820.988               | 4820.996                | -14.0                  |
| 9  | 1                | 9                | 8   | 0                 | 8                 | 4820.988               | 4821.021                | -14.0                  |
| 7  | 2                | 5                | 6   | 2                 | 4                 | 4839.146               | 4839.161                | -14.7                  |
| 7  | 5                | 2                | 6   | 5                 | 1                 | 4850.056               | 4850.046                | 9.2                    |
| 7  | 4                | 3                | 6   | 4                 | 2                 | 5038.100               | 5038.106                | -5.9                   |
| 7  | 3                | 4                | 6   | 3                 | 3                 | 5163.205               | 5163.224                | -18.2                  |
| 8  | 3                | 6                | 7   | 3                 | 5                 | 5193.319               | 5193.322                | -3.2                   |
| 9  | 2                | 8                | 8   | 2                 | 7                 | 5282.990               | 5282.995                | -4.4                   |
| 9  | 1                | 8                | 8   | 1                 | 7                 | 5286.485               | 5286.486                | -0.8                   |
| 8  | 2                | 6                | 7   | 2                 | 5                 | 5317.707               | 5317.713                | -5.5                   |
| 10 | 0                | 10               | 9   | 1                 | 9                 | 5330.920               | 5330.900                | 5.2                    |
| 10 | 1                | 10               | 9   | 1                 | 9                 | 5330.920               | 5330.906                | 5.2                    |
| 10 | 0                | 10               | 9   | 0                 | 9                 | 5330.920               | 5330.924                | 5.2                    |
| 10 | 1                | 10               | 9   | 0                 | 9                 | 5330.920               | 5330.930                | 5.2                    |
| 8  | 4                | 5                | 7   | 4                 | 4                 | 5467.316               | 5467.329                | -13.2                  |
| 6  | 2                | 4                | 5   | 1                 | 4                 | 5496.412               | 5496.407                | 5.0                    |
| 8  | 6                | 3                | 7   | 6                 | 2                 | 5503.835               | 5503.830                | 4.7                    |
| 8  | 6                | 2                | 7   | 6                 | 1                 | 5511.246               | 5511.250                | -4.3                   |
| 8  | 5                | 4                | 7   | 5                 | 3                 | 5537.140               | 5537.136                | 3.4                    |
| 8  | 5                | 3                | 7   | 5                 | 2                 | 5632.570               | 5632.588                | -18.2                  |
| 9  | 2                | 7                | 8   | 2                 | 6                 | 5789.443               | 5789.442                | 1.0                    |

| J' | K <sub>a</sub> ' | K <sub>c</sub> ' | J'' | K <sub>a</sub> '' | K <sub>c</sub> '' | $\nu_{obs}/\text{MHz}$ | $\nu_{calc}/\text{MHz}$ | $\Delta\nu/\text{kHz}$ |
|----|------------------|------------------|-----|-------------------|-------------------|------------------------|-------------------------|------------------------|
| 10 | 2                | 9                | 9   | 2                 | 8                 | 5793.449               | 5793.446                | 3.2                    |
| 10 | 1                | 9                | 9   | 1                 | 8                 | 5794.522               | 5794.509                | 12.7                   |
| 8  | 3                | 5                | 7   | 3                 | 4                 | 5823.184               | 5823.210                | -25.5                  |
| 5  | 5                | 1                | 4   | 4                 | 0                 | 5833.432               | 5833.432                | 0.5                    |
| 5  | 5                | 0                | 4   | 4                 | 0                 | 5834.034               | 5834.030                | 4.6                    |
| 5  | 5                | 1                | 4   | 4                 | 1                 | 5836.568               | 5836.558                | 10.6                   |
| 5  | 5                | 0                | 4   | 4                 | 1                 | 5837.163               | 5837.156                | 7.1                    |
| 11 | 0                | 11               | 10  | 1                 | 10                | 5840.877               | 5840.877                | 0.0                    |
| 11 | 1                | 11               | 10  | 1                 | 10                | 5840.877               | 5840.879                | 0.0                    |
| 11 | 0                | 11               | 10  | 0                 | 10                | 5840.877               | 5840.883                | 0.0                    |
| 11 | 1                | 11               | 10  | 0                 | 10                | 5840.877               | 5840.885                | 0.0                    |
| 6  | 4                | 3                | 5   | 3                 | 3                 | 6056.323               | 6056.323                | 0.3                    |
| 9  | 4                | 6                | 8   | 4                 | 5                 | 6085.936               | 6085.952                | -16.2                  |
| 10 | 3                | 8                | 9   | 3                 | 7                 | 6254.024               | 6254.017                | 7.1                    |
| 10 | 2                | 8                | 9   | 2                 | 7                 | 6276.588               | 6276.587                | 1.3                    |
| 11 | 2                | 10               | 10  | 2                 | 9                 | 6303.341               | 6303.332                | 9.0                    |
| 11 | 1                | 10               | 10  | 1                 | 9                 | 6303.641               | 6303.642                | -0.7                   |
| 12 | 0                | 12               | 11  | 1                 | 11                | 6350.849               | 6350.852                | -3.2                   |
| 12 | 1                | 12               | 11  | 1                 | 11                | 6350.849               | 6350.852                | -3.2                   |
| 9  | 3                | 6                | 8   | 3                 | 5                 | 6376.332               | 6376.329                | 3.1                    |
| 11 | 2                | 9                | 10  | 2                 | 8                 | 6775.813               | 6775.801                | 11.2                   |
| 10 | 3                | 7                | 9   | 3                 | 6                 | 6850.215               | 6850.231                | -15.7                  |
| 13 | 0                | 13               | 12  | 1                 | 12                | 6860.824               | 6860.826                | -2.4                   |
| 13 | 1                | 13               | 12  | 1                 | 12                | 6860.824               | 6860.826                | -2.4                   |
| 7  | 4                | 3                | 6   | 3                 | 4                 | 7184.274               | 7184.299                | -24.9                  |
| 12 | 3                | 10               | 11  | 3                 | 9                 | 7278.294               | 7278.286                | 8.4                    |



| J' | K <sub>a</sub> ' | K <sub>c</sub> ' | J'' | K <sub>a</sub> '' | K <sub>c</sub> '' | $\nu_{obs}/\text{MHz}$ | $\nu_{calc}/\text{MHz}$ | $\Delta\nu/\text{kHz}$ |
|----|------------------|------------------|-----|-------------------|-------------------|------------------------|-------------------------|------------------------|
| 12 | 2                | 10               | 11  | 2                 | 9                 | 7280.942               | 7280.930                | 11.3                   |

### 3.4 Frequency list of the xanthene-(H<sub>2</sub>O)<sub>3</sub> complex

Table S47: Assigned rotational transitions for the xanthene-(H<sub>2</sub>O)<sub>3</sub> complex, 3w-I.

| J' | K <sub>a</sub> ' | K <sub>c</sub> ' | J'' | K <sub>a</sub> '' | K <sub>c</sub> '' | $\nu_{obs}/\text{MHz}$ | $\nu_{calc}/\text{MHz}$ | $\Delta\nu/\text{kHz}$ |
|----|------------------|------------------|-----|-------------------|-------------------|------------------------|-------------------------|------------------------|
| 3  | 1                | 2                | 2   | 0                 | 2                 | 2489.939               | 2489.946                | -6.5                   |
| 5  | 1                | 4                | 4   | 2                 | 2                 | 2609.182               | 2609.163                | 19.9                   |
| 5  | 0                | 5                | 4   | 1                 | 3                 | 2661.717               | 2661.703                | 13.4                   |
| 3  | 2                | 1                | 2   | 1                 | 1                 | 2968.759               | 2968.768                | -8.4                   |
| 3  | 2                | 2                | 2   | 1                 | 2                 | 3083.555               | 3083.561                | -6.5                   |
| 6  | 0                | 6                | 5   | 1                 | 4                 | 3113.324               | 3113.316                | 8.6                    |
| 4  | 1                | 3                | 3   | 0                 | 3                 | 3263.005               | 3263.019                | -13.4                  |
| 6  | 1                | 5                | 5   | 2                 | 3                 | 3300.407               | 3300.410                | -2.8                   |
| 4  | 2                | 2                | 3   | 1                 | 2                 | 3616.591               | 3616.601                | -10.4                  |
| 3  | 3                | 0                | 2   | 2                 | 0                 | 3677.181               | 3677.175                | 5.7                    |
| 3  | 3                | 1                | 2   | 2                 | 1                 | 3681.666               | 3681.650                | 16.7                   |
| 4  | 2                | 3                | 3   | 1                 | 3                 | 3824.427               | 3824.436                | -8.6                   |
| 5  | 1                | 4                | 4   | 0                 | 4                 | 4071.604               | 4071.608                | -4.1                   |
| 5  | 2                | 3                | 4   | 1                 | 3                 | 4279.999               | 4280.010                | -11.0                  |
| 10 | 1                | 10               | 9   | 2                 | 8                 | 4311.563               | 4311.567                | -3.7                   |
| 4  | 3                | 1                | 3   | 2                 | 1                 | 4341.482               | 4341.482                | 0.1                    |
| 4  | 3                | 2                | 3   | 2                 | 2                 | 4362.910               | 4362.911                | -1.3                   |
| 5  | 2                | 4                | 4   | 1                 | 4                 | 4587.335               | 4587.331                | 4.1                    |

| J' | K <sub>a</sub> ' | K <sub>c</sub> ' | J'' | K <sub>a</sub> '' | K <sub>c</sub> '' | $\nu_{obs}/\text{MHz}$ | $\nu_{calc}/\text{MHz}$ | $\Delta\nu/\text{kHz}$ |
|----|------------------|------------------|-----|-------------------|-------------------|------------------------|-------------------------|------------------------|
| 6  | 1                | 5                | 5   | 0                 | 5                 | 4918.721               | 4918.717                | 4.1                    |
| 6  | 2                | 4                | 5   | 1                 | 4                 | 4969.550               | 4969.566                | -15.2                  |
| 5  | 3                | 2                | 4   | 2                 | 2                 | 4992.555               | 4992.567                | -12.2                  |
| 4  | 4                | 0                | 3   | 3                 | 0                 | 5016.381               | 5016.368                | 13.3                   |
| 4  | 4                | 1                | 3   | 3                 | 1                 | 5016.674               | 5016.663                | 10.4                   |
| 6  | 2                | 5                | 5   | 1                 | 5                 | 5371.760               | 5371.763                | -2.9                   |
| 6  | 3                | 3                | 5   | 2                 | 3                 | 5627.661               | 5627.673                | -12.0                  |
| 12 | 3                | 10               | 11  | 4                 | 8                 | 5656.562               | 5656.570                | -8.1                   |
| 5  | 4                | 1                | 4   | 3                 | 1                 | 5689.117               | 5689.104                | 12.2                   |
| 5  | 4                | 2                | 4   | 3                 | 2                 | 5691.130               | 5691.127                | 3.2                    |
| 7  | 2                | 5                | 6   | 1                 | 5                 | 5692.600               | 5692.614                | -13.7                  |
| 6  | 3                | 4                | 5   | 2                 | 4                 | 5754.266               | 5754.276                | -9.9                   |
| 7  | 1                | 6                | 6   | 0                 | 6                 | 5800.964               | 5800.947                | 16.9                   |
| 11 | 1                | 10               | 10  | 2                 | 8                 | 5893.099               | 5893.087                | 12.6                   |
| 7  | 2                | 6                | 6   | 1                 | 6                 | 6176.665               | 6176.648                | 16.6                   |
| 7  | 3                | 4                | 6   | 2                 | 4                 | 6250.759               | 6250.771                | -12.0                  |
| 6  | 4                | 2                | 5   | 3                 | 2                 | 6358.476               | 6358.482                | -6.1                   |
| 6  | 4                | 3                | 5   | 3                 | 3                 | 6366.319               | 6366.322                | -3.0                   |
| 8  | 2                | 6                | 7   | 1                 | 6                 | 6454.575               | 6454.560                | 14.8                   |
| 7  | 3                | 5                | 6   | 2                 | 5                 | 6471.122               | 6471.115                | 7.9                    |
| 7  | 4                | 8                | 6   | 3                 | 3                 | 7020.941               | 7020.950                | -9.8                   |
| 6  | 5                | 3                | 5   | 4                 | 1                 | 7027.312               | 7027.300                | 11.2                   |
| 6  | 5                | 1                | 5   | 4                 | 2                 | 7027.455               | 7027.443                | 12.4                   |
| 7  | 4                | 4                | 6   | 3                 | 4                 | 7043.437               | 7043.447                | -9.3                   |
| 8  | 3                | 6                | 7   | 2                 | 6                 | 7205.788               | 7205.797                | -9.2                   |
| 9  | 3                | 6                | 8   | 2                 | 6                 | 7509.244               | 7509.239                | 5.3                    |

| J' | K <sub>a</sub> ' | K <sub>c</sub> ' | J'' | K <sub>a</sub> '' | K <sub>c</sub> '' | $\nu_{obs}/\text{MHz}$ | $\nu_{calc}/\text{MHz}$ | $\Delta\nu/\text{kHz}$ |
|----|------------------|------------------|-----|-------------------|-------------------|------------------------|-------------------------|------------------------|
| 8  | 4                | 4                | 7   | 3                 | 4                 | 7671.724               | 7671.737                | -12.9                  |
| 7  | 5                | 6                | 6   | 4                 | 2                 | 7700.245               | 7700.235                | 10.5                   |
| 7  | 5                | 6                | 6   | 4                 | 3                 | 7700.933               | 7700.933                | -0.5                   |
| 8  | 4                | 4                | 7   | 3                 | 5                 | 7724.525               | 7724.542                | -17.3                  |
| 9  | 3                | 8                | 8   | 2                 | 7                 | 7960.202               | 7960.190                | 11.3                   |

### 3.5 Frequency list of the xanthene-(H<sub>2</sub>O)<sub>4</sub> complex

Table S48: Assigned rotational transitions for the xanthene-(H<sub>2</sub>O)<sub>4</sub> complex, 4w-II.

| J' | K <sub>a</sub> ' | K <sub>c</sub> ' | J'' | K <sub>a</sub> '' | K <sub>c</sub> '' | $\nu_{obs}/\text{MHz}$ | $\nu_{calc}/\text{MHz}$ | $\Delta\nu/\text{kHz}$ |
|----|------------------|------------------|-----|-------------------|-------------------|------------------------|-------------------------|------------------------|
| 5  | 0                | 5                | 4   | 1                 | 3                 | 2544.926               | 2544.923                | 2.9                    |
| 4  | 2                | 2                | 3   | 1                 | 2                 | 3127.570               | 3127.547                | 22.7                   |
| 6  | 0                | 6                | 5   | 1                 | 5                 | 3434.717               | 3434.714                | 2.9                    |
| 7  | 0                | 7                | 6   | 1                 | 6                 | 4039.636               | 4039.627                | 9.3                    |
| 4  | 4                | 0                | 3   | 3                 | 0                 | 4208.104               | 4208.105                | 1.9                    |
| 4  | 4                | 1                | 3   | 3                 | 0                 | 4208.104               | 4208.100                | 1.9                    |
| 4  | 4                | 1                | 3   | 3                 | 1                 | 4208.213               | 4208.212                | -2.1                   |
| 4  | 4                | 0                | 3   | 3                 | 1                 | 4208.213               | 4208.217                | -2.1                   |
| 5  | 3                | 3                | 4   | 2                 | 3                 | 4308.451               | 4308.451                | 0.0                    |
| 5  | 3                | 2                | 4   | 2                 | 3                 | 4311.563               | 4311.569                | -6.0                   |
| 5  | 4                | 2                | 4   | 3                 | 1                 | 4809.824               | 4809.803                | 0.6                    |
| 5  | 4                | 1                | 4   | 3                 | 1                 | 4809.824               | 4809.846                | 0.6                    |
| 5  | 4                | 2                | 4   | 3                 | 2                 | 4810.620               | 4810.589                | 8.7                    |
| 5  | 4                | 1                | 4   | 3                 | 2                 | 4810.620               | 4810.631                | 8.7                    |

| J' | K <sub>a</sub> ' | K <sub>c</sub> ' | J'' | K <sub>a</sub> '' | K <sub>c</sub> '' | $\nu_{obs}/\text{MHz}$ | $\nu_{calc}/\text{MHz}$ | $\Delta\nu/\text{kHz}$ |
|----|------------------|------------------|-----|-------------------|-------------------|------------------------|-------------------------|------------------------|
| 6  | 3                | 4                | 5   | 2                 | 3                 | 4851.023               | 4851.022                | 0.7                    |
| 6  | 3                | 3                | 5   | 2                 | 3                 | 4860.269               | 4860.257                | 11.8                   |
| 6  | 3                | 4                | 5   | 2                 | 4                 | 4924.324               | 4924.336                | -11.5                  |
| 9  | 0                | 9                | 8   | 1                 | 8                 | 5225.438               | 5225.436                | 1.5                    |
| 5  | 5                | 1                | 4   | 4                 | 0                 | 5324.449               | 5324.443                | 3.2                    |
| 5  | 5                | 1                | 4   | 4                 | 1                 | 5324.449               | 5324.448                | 3.2                    |
| 5  | 5                | 0                | 4   | 4                 | 0                 | 5324.449               | 5324.444                | 3.2                    |
| 5  | 5                | 0                | 4   | 4                 | 1                 | 5324.449               | 5324.448                | 3.2                    |
| 7  | 3                | 5                | 6   | 2                 | 4                 | 5409.046               | 5409.051                | -5.4                   |
| 6  | 4                | 3                | 5   | 3                 | 2                 | 5410.025               | 5410.014                | 10.4                   |
| 6  | 4                | 2                | 5   | 3                 | 2                 | 5410.226               | 5410.225                | 1.2                    |
| 6  | 4                | 3                | 5   | 3                 | 3                 | 5413.137               | 5413.132                | 4.8                    |
| 6  | 4                | 2                | 5   | 3                 | 3                 | 5413.340               | 5413.343                | -2.3                   |
| 7  | 3                | 4                | 6   | 2                 | 4                 | 5431.671               | 5431.665                | 6.5                    |
| 8  | 1                | 7                | 7   | 0                 | 7                 | 5669.935               | 5669.932                | 2.6                    |
| 10 | 0                | 10               | 9   | 1                 | 9                 | 5809.483               | 5809.503                | -20.0                  |
| 10 | 1                | 10               | 9   | 0                 | 9                 | 5843.194               | 5843.168                | 26.1                   |
| 7  | 4                | 4                | 6   | 3                 | 3                 | 6006.995               | 6007.001                | -5.8                   |
| 7  | 4                | 4                | 6   | 3                 | 4                 | 6016.235               | 6016.236                | -1.3                   |
| 7  | 4                | 3                | 6   | 3                 | 4                 | 6016.992               | 6017.002                | -10.3                  |
| 11 | 1                | 11               | 10  | 0                 | 10                | 6410.323               | 6410.339                | -15.7                  |
| 8  | 4                | 5                | 7   | 3                 | 5                 | 6620.652               | 6620.664                | -12.2                  |
| 8  | 4                | 4                | 7   | 3                 | 5                 | 6622.934               | 6622.938                | -4.0                   |
| 7  | 6                | 2                | 6   | 5                 | 1                 | 7042.935               | 7042.923                | 11.2                   |
| 7  | 6                | 2                | 6   | 5                 | 2                 | 7042.935               | 7042.925                | 11.2                   |
| 8  | 5                | 4                | 7   | 4                 | 3                 | 7129.441               | 7129.441                | -23.8                  |

| J' | K <sub>a</sub> ' | K <sub>c</sub> ' | J'' | K <sub>a</sub> '' | K <sub>c</sub> '' | $\nu_{obs}/\text{MHz}$ | $\nu_{calc}/\text{MHz}$ | $\Delta\nu/\text{kHz}$ |
|----|------------------|------------------|-----|-------------------|-------------------|------------------------|-------------------------|------------------------|
| 8  | 5                | 3                | 7   | 4                 | 3                 | 7129.441               | 7129.491                | -23.8                  |
| 8  | 5                | 4                | 7   | 4                 | 4                 | 7130.230               | 7130.206                | -2.5                   |
| 8  | 5                | 3                | 7   | 4                 | 4                 | 7130.230               | 7130.257                | -2.5                   |
| 9  | 4                | 5                | 8   | 3                 | 6                 | 7233.427               | 7233.411                | 15.6                   |

## References

- (1) Meng, E. C.; Goddard, T. D.; Pettersen, E. F.; Couch, G. S.; Pearson, Z. J.; Morris, J. H.; Ferrin, T. E. UCSF ChimeraX: Tools for structure building and analysis. *Protein Science* **2023**, *32*, e4792.
- (2) Johnson, E. R.; Keinan, S.; Mori-Sánchez, P.; Contreras-García, J.; Cohen, A. J.; Yang, W. Revealing noncovalent interactions. *Journal of the American Chemical Society* **2010**, *132*, 6498–6506.
- (3) Lu, T.; Chen, F. Multiwfn: A multifunctional wavefunction analyzer. *Journal of computational chemistry* **2012**, *33*, 580–592.
